# Supplementary material for: Construction of Potential miRNA-mRNA Regulatory Network in AMI Plasma by Bioinformatics Analysis
Source: Research Square preprint supplement (doi:10.21203/rs.3.rs-1250640/v1), 2022-01-17
Supplement: Supplementary file 1 [file 3c24a058026f059e69e5974c.xlsx]

## Sheet: GSE61741.top.table
ID	adj.P.Val	P.Value	t	B	logFC
hsa-miR-1245	0.000165	4.28e-06	4.76341	3.9686	1.66328
hsa-miR-1258	2.59e-05	1.81e-07	-5.46067	6.943	-2.18928
hsa-miR-1282	0.0047615	0.000522	-3.54204	-0.4798	-1.76038
hsa-miR-1283	6.99e-05	1.15e-06	5.05974	5.1975	1.88108
hsa-miR-132*	2.25e-05	1.06e-07	-5.57247	7.4459	-1.96814
hsa-miR-135b	0.0013543	7.67e-05	-4.06127	1.2831	-1.63832
hsa-miR-142-3p	6.26e-05	8.12e-07	-5.13745	5.5286	-2.23352
hsa-miR-1468	0.0001382	3.26e-06	-4.82603	4.2238	-1.99259
hsa-miR-154	0.0007762	3.2e-05	-4.28206	2.0916	-1.67688
hsa-miR-155*	0.0003323	1.14e-05	4.53435	3.0564	1.60187
hsa-miR-190b	0.00244	0.000204	-3.80246	0.3795	-1.7142
hsa-miR-200a	6.79e-05	1.02e-06	5.08744	5.3151	1.80041
hsa-miR-204	6.79e-05	1.04e-06	-5.08262	5.2946	-1.95806
hsa-miR-21*	0.0014471	8.53e-05	4.03357	1.1841	1.55826
hsa-miR-29c*	2.25e-05	9.29e-08	-5.60004	7.5709	-2.17687
hsa-miR-302b	0.0001118	2.24e-06	-4.91117	4.5747	-2.10467
hsa-miR-302d	0.0010578	4.87e-05	-4.17737	1.704	-1.58401
hsa-miR-31*	2.59e-05	2.14e-07	5.42492	6.7837	1.83878
hsa-miR-373	0.0014906	9.27e-05	-4.01216	1.1079	-1.57043
hsa-miR-375	2.25e-05	8.77e-08	-5.61196	7.6251	-2.35066
hsa-miR-483-3p	0.0024546	0.000211	-3.79332	0.3485	-1.58107
hsa-miR-488	0.0013133	7.07e-05	-4.08222	1.3583	-1.72767
hsa-miR-488*	3.49e-05	3.3e-07	5.33278	6.3763	1.55239
hsa-miR-508-3p	0.0011162	5.66e-05	-4.1388	1.5631	-1.74632
hsa-miR-515-5p	2.25e-05	8.85e-08	5.6101	7.6166	1.55744
hsa-miR-520c-3p	7.46e-05	1.32e-06	-5.02991	5.0714	-1.9432
hsa-miR-522	0.0014471	8.52e-05	-4.03403	1.1857	-1.65406
hsa-miR-545*	0.0011162	5.79e-05	4.13312	1.5425	1.51866
hsa-miR-576-5p	0.0003481	1.23e-05	-4.51511	2.9813	-1.55987
hsa-miR-578	0.0047979	0.000532	-3.53683	-0.4965	-1.55179
hsa-miR-601	0.000326	9.99e-06	-4.56493	3.1762	-1.83593
hsa-miR-609	0.000746	2.99e-05	-4.2991	2.1555	-1.92246
hsa-miR-942	0.0013133	7.27e-05	-4.07481	1.3317	-1.7262
hsa-miR-98	0.0057834	0.000716	-3.45121	-0.7673	-1.5809
