# Supplementary material for: Construction of Potential miRNA-mRNA Regulatory Network in AMI Plasma by Bioinformatics Analysis
Source: Research Square preprint supplement (doi:10.21203/rs.3.rs-1250640/v1), 2022-01-17
Supplement: Supplementary file 2 [file 6d89767e0556ddb660ca052a.xlsx]

## Sheet: GSE148153.top.table
ID	adj.P.Val	P.Value	t	B	logFC
hsa-miR-200b-3p	0.0203	0.0134	-2.90737	-3.6616	-9.0602
hsa-miR-200a-3p	0.0181	0.0118	-2.97862	-3.5323	-8.55071
hsa-miR-194-5p	0.0447	0.032	-2.43246	-4.5065	-7.97075
hsa-miR-24-1-5p	0.000113	5.41e-05	-6.15963	1.9583	-7.88299
hsa-miR-338-3p	0.00419	0.0024	-3.85358	-1.9337	-7.55914
hsa-miR-218-5p	0.00173	0.00093	-4.39066	-0.97	-7.44361
hsa-miR-363-3p	0.00383	0.00217	-3.90982	-1.8317	-7.27877
hsa-miR-340-3p	0.000153	7.39e-05	-5.95148	1.6362	-7.03407
hsa-miR-143-3p	0.0187	0.0122	-2.9585	-3.5688	-6.99741
hsa-miR-1-3p	0.00696	0.00419	-3.54331	-2.4996	-6.98433
hsa-miR-4328	0.00298	0.00166	-4.06064	-1.5592	-6.98135
hsa-miR-4508	0.000104	4.92e-05	-6.22329	2.0555	-6.92646
hsa-miR-582-5p	0.00149	0.000796	-4.48108	-0.8105	-6.89573
hsa-miR-192-3p	0.014	0.00895	-3.12813	-3.2598	-6.89533
hsa-miR-204-5p	0.000486	0.000246	-5.18314	0.3943	-6.72177
hsa-miR-375	0.0386	0.0271	-2.52361	-4.3473	-6.57776
hsa-miR-148a-3p	0.00953	0.00588	-3.35735	-2.8402	-6.47233
hsa-miR-192-5p	0.00946	0.00583	-3.36181	-2.8321	-6.46172
hsa-miR-154-5p	0.00299	0.00166	-4.059	-1.5621	-6.26867
hsa-miR-195-5p	0.000805	0.000418	-4.86161	-0.1497	-6.2389
hsa-miR-4655-3p	0.000415	0.000209	-5.28456	0.5629	-6.19161
hsa-miR-410-3p	0.0141	0.00901	-3.12483	-3.2658	-6.08195
hsa-miR-199a-3p	0.000512	0.000261	-5.14827	0.3359	-5.97657
hsa-miR-449a	0.00067	0.000345	-4.97695	0.047	-5.9672
hsa-miR-141-3p	0.0404	0.0286	-2.49537	-4.3968	-5.73423
hsa-miR-455-5p	0.00471	0.00273	-3.78043	-2.0667	-5.7294
hsa-let-7i-5p	0.000365	0.000183	-5.36832	0.7012	-5.66224
hsa-miR-215-5p	0.00936	0.00575	-3.37013	-2.8168	-5.61597
hsa-let-7g-5p	0.000621	0.000319	-5.0246	0.1278	-5.54727
hsa-miR-150-5p	0.00212	0.00116	-4.26577	-1.1917	-5.47295
hsa-miR-29c-5p	0.0103	0.00644	-3.30815	-2.9304	-5.37606
hsa-miR-140-5p	0.0102	0.00632	-3.3184	-2.9116	-5.36169
hsa-miR-495-3p	0.00485	0.00282	-3.76282	-2.0988	-5.3541
hsa-miR-34b-5p	0.00685	0.00412	-3.55321	-2.4815	-5.34621
hsa-miR-199b-5p	0.00585	0.00347	-3.64813	-2.308	-5.30491
hsa-miR-145-3p	0.0218	0.0145	-2.86618	-3.7361	-5.26692
hsa-miR-3912-5p	0.047	0.0337	-2.40377	-4.5562	-5.26535
hsa-miR-133b	0.00195	0.00106	-4.31643	-1.1016	-5.20532
hsa-let-7d-5p	0.00107	0.000565	-4.68281	-0.458	-5.20121
hsa-miR-7-5p	0.000564	0.000289	-5.0857	0.2309	-5.17989
hsa-miR-299-5p	0.00458	0.00265	-3.79648	-2.0375	-5.15778
hsa-miR-4770	0.00233	0.00127	-4.20977	-1.2916	-5.1316
hsa-miR-411-5p	0.00333	0.00186	-3.99603	-1.6757	-5.06789
hsa-miR-28-5p	0.00915	0.0056	-3.38392	-2.7916	-4.99561
hsa-miR-96-5p	0.000323	0.000161	-5.44935	0.834	-4.9775
hsa-miR-10b-5p	0.000341	0.000171	-5.41241	0.7736	-4.95315
hsa-miR-10a-5p	0.000193	9.42e-05	-5.79259	1.3863	-4.93581
hsa-miR-146b-5p	0.0102	0.00631	-3.31918	-2.9102	-4.90562
hsa-miR-34a-5p	0.000189	9.2e-05	-5.80794	1.4106	-4.88965
hsa-miR-98-5p	0.011	0.00686	-3.27336	-2.9941	-4.88492
hsa-miR-1915-5p	0.00689	0.00414	-3.54974	-2.4879	-4.82643
hsa-miR-4500	0.00114	0.000602	-4.64447	-0.5246	-4.82361
hsa-miR-429	0.00889	0.00543	-3.4011	-2.7601	-4.71976
hsa-miR-34c-5p	0.00935	0.00573	-3.3714	-2.8145	-4.68717
hsa-let-7e-5p	0.000354	0.000178	-5.38687	0.7317	-4.68252
hsa-miR-143-5p	0.047	0.0338	-2.4024	-4.5585	-4.67125
hsa-miR-497-5p	0.00158	0.000849	-4.44373	-0.8762	-4.63584
hsa-miR-20a-5p	0.000445	0.000225	-5.23971	0.4885	-4.61656
hsa-let-7c-5p	0.00402	0.00229	-3.87848	-1.8885	-4.56427
hsa-miR-3616-3p	0.00958	0.00592	-3.3543	-2.8458	-4.49603
hsa-miR-4510	0.00959	0.00593	-3.35317	-2.8479	-4.4475
hsa-miR-137	0.0369	0.0259	-2.54837	-4.3038	-4.44536
hsa-miR-592	0.00566	0.00333	-3.67018	-2.2677	-4.4074
hsa-miR-20b-5p	0.000551	0.000281	-5.10241	0.259	-4.3954
hsa-miR-191-5p	0.00826	0.00501	-3.44477	-2.6801	-4.38853
hsa-miR-153-3p	0.00918	0.00563	-3.38181	-2.7954	-4.37589
hsa-miR-369-5p	0.00359	0.00202	-3.9488	-1.7611	-4.37304
hsa-miR-4297	0.0336	0.0233	-2.60758	-4.1992	-4.35954
hsa-miR-223-3p	0.00213	0.00116	-4.26323	-1.1962	-4.23221
hsa-miR-30c-5p	0.000748	0.000387	-4.90844	-0.0696	-4.21612
hsa-miR-142-3p	0.00384	0.00217	-3.90855	-1.834	-4.20656
hsa-miR-6504-5p	0.0327	0.0226	-2.62498	-4.1683	-4.17661
hsa-miR-224-5p	0.00821	0.00498	-3.44879	-2.6727	-4.17575
hsa-miR-136-3p	0.0184	0.0121	-2.96597	-3.5552	-4.13261
hsa-let-7b-5p	0.00226	0.00123	-4.22842	-1.2583	-4.06785
hsa-miR-32-5p	0.0191	0.0126	-2.94264	-3.5976	-4.04943
hsa-miR-132-5p	0.0145	0.00929	-3.10832	-3.296	-4.01967
hsa-miR-145-5p	0.0212	0.014	-2.8837	-3.7044	-3.97868
hsa-miR-26b-5p	0.00209	0.00114	-4.27464	-1.1759	-3.91871
hsa-miR-15b-5p	0.00129	0.000689	-4.56586	-0.6618	-3.85121
hsa-miR-139-5p	0.0338	0.0234	-2.60445	-4.2048	-3.83791
hsa-miR-214-5p	0.0353	0.0246	-2.57754	-4.2523	-3.83595
hsa-miR-27b-3p	0.00455	0.00262	-3.80264	-2.0263	-3.76736
hsa-miR-126-5p	0.000561	0.000287	-5.09007	0.2382	-3.76146
hsa-miR-126-3p	0.00607	0.00361	-3.62564	-2.3491	-3.73519
hsa-miR-598-3p	8.68e-05	4.11e-05	-6.34639	2.242	-3.72577
hsa-miR-548am-5p	9.8e-05	4.65e-05	-6.26181	2.1141	-3.66349
hsa-miR-151a-5p	0.00289	0.0016	-4.07932	-1.5256	-3.66305
hsa-miR-183-5p	0.000153	7.39e-05	-5.95152	1.6363	-3.64847
hsa-miR-221-5p	0.0365	0.0256	-2.55551	-4.2912	-3.63613
hsa-miR-7-1-3p	0.0298	0.0203	-2.68132	-4.0681	-3.57034
hsa-miR-146a-5p	0.00424	0.00243	-3.8445	-1.9502	-3.55489
hsa-miR-326	0.00751	0.00453	-3.5005	-2.578	-3.49746
hsa-miR-199a-5p	0.00837	0.00509	-3.43608	-2.696	-3.49418
hsa-let-7f-5p	0.00421	0.00241	-3.85063	-1.9391	-3.49321
hsa-miR-200c-5p	0.0365	0.0256	-2.55529	-4.2916	-3.47379
hsa-miR-144-5p	0.013	0.00823	-3.17439	-3.1752	-3.44292
hsa-miR-30b-5p	0.00414	0.00236	-3.86157	-1.9192	-3.30587
hsa-miR-187-5p	0.00572	0.00337	-3.66351	-2.2799	-3.29711
hsa-miR-223-5p	0.0188	0.0123	-2.95452	-3.5761	-3.24992
hsa-miR-31-3p	0.00141	0.000756	-4.51104	-0.7578	-3.23624
hsa-let-7a-5p	0.00576	0.0034	-3.65883	-2.2884	-3.23403
hsa-miR-15a-5p	0.00615	0.00367	-3.61698	-2.3649	-3.23204
hsa-miR-16-5p	0.00542	0.00318	-3.6962	-2.2202	-3.23085
hsa-miR-133a-3p	0.000339	0.000169	-5.4174	0.7817	-3.20928
hsa-miR-21-5p	0.00576	0.0034	-3.65946	-2.2873	-3.12919
hsa-miR-337-5p	0.032	0.022	-2.63803	-4.1452	-3.12335
hsa-miR-323a-3p	0.0336	0.0232	-2.60877	-4.1971	-3.11912
hsa-miR-99a-5p	0.026	0.0175	-2.76302	-3.9219	-3.09996
hsa-miR-23b-3p	0.00195	0.00106	-4.31818	-1.0985	-3.04889
hsa-miR-152-3p	0.0117	0.00735	-3.23569	-3.0631	-3.02241
hsa-let-7c-3p	1.89e-07	7.41e-08	-11.8011	8.6682	-2.9991
hsa-miR-1-5p	1.89e-07	7.41e-08	-11.8011	8.6682	-2.9991
hsa-miR-103b	1.89e-07	7.41e-08	-11.8011	8.6682	-2.9991
hsa-miR-106a-3p	1.89e-07	7.41e-08	-11.8011	8.6682	-2.9991
hsa-miR-1178-3p	1.89e-07	7.41e-08	-11.8011	8.6682	-2.9991
hsa-miR-1178-5p	1.89e-07	7.41e-08	-11.8011	8.6682	-2.9991
hsa-miR-1179	1.89e-07	7.41e-08	-11.8011	8.6682	-2.9991
hsa-miR-1185-5p	1.89e-07	7.41e-08	-11.8011	8.6682	-2.9991
hsa-miR-1197	1.89e-07	7.41e-08	-11.8011	8.6682	-2.9991
hsa-miR-1200	1.89e-07	7.41e-08	-11.8011	8.6682	-2.9991
hsa-miR-1206	1.89e-07	7.41e-08	-11.8011	8.6682	-2.9991
hsa-miR-122-3p	1.89e-07	7.41e-08	-11.8011	8.6682	-2.9991
hsa-miR-1226-3p	1.89e-07	7.41e-08	-11.8011	8.6682	-2.9991
hsa-miR-1231	1.89e-07	7.41e-08	-11.8011	8.6682	-2.9991
hsa-miR-1245a	1.89e-07	7.41e-08	-11.8011	8.6682	-2.9991
hsa-miR-1245b-3p	1.89e-07	7.41e-08	-11.8011	8.6682	-2.9991
hsa-miR-1245b-5p	1.89e-07	7.41e-08	-11.8011	8.6682	-2.9991
hsa-miR-1248	1.89e-07	7.41e-08	-11.8011	8.6682	-2.9991
hsa-miR-1251-3p	1.89e-07	7.41e-08	-11.8011	8.6682	-2.9991
hsa-miR-1252-3p	1.89e-07	7.41e-08	-11.8011	8.6682	-2.9991
hsa-miR-1252-5p	1.89e-07	7.41e-08	-11.8011	8.6682	-2.9991
hsa-miR-1253	1.89e-07	7.41e-08	-11.8011	8.6682	-2.9991
hsa-miR-1255a	1.89e-07	7.41e-08	-11.8011	8.6682	-2.9991
hsa-miR-1255b-2-3p	1.89e-07	7.41e-08	-11.8011	8.6682	-2.9991
hsa-miR-1255b-5p	1.89e-07	7.41e-08	-11.8011	8.6682	-2.9991
hsa-miR-1256	1.89e-07	7.41e-08	-11.8011	8.6682	-2.9991
hsa-miR-1257	1.89e-07	7.41e-08	-11.8011	8.6682	-2.9991
hsa-miR-1263	1.89e-07	7.41e-08	-11.8011	8.6682	-2.9991
hsa-miR-1265	1.89e-07	7.41e-08	-11.8011	8.6682	-2.9991
hsa-miR-1269a	1.89e-07	7.41e-08	-11.8011	8.6682	-2.9991
hsa-miR-1269b	1.89e-07	7.41e-08	-11.8011	8.6682	-2.9991
hsa-miR-1271-3p	1.89e-07	7.41e-08	-11.8011	8.6682	-2.9991
hsa-miR-1273a	1.89e-07	7.41e-08	-11.8011	8.6682	-2.9991
hsa-miR-1277-3p	1.89e-07	7.41e-08	-11.8011	8.6682	-2.9991
hsa-miR-1278	1.89e-07	7.41e-08	-11.8011	8.6682	-2.9991
hsa-miR-1279	1.89e-07	7.41e-08	-11.8011	8.6682	-2.9991
hsa-miR-1282	1.89e-07	7.41e-08	-11.8011	8.6682	-2.9991
hsa-miR-1283	1.89e-07	7.41e-08	-11.8011	8.6682	-2.9991
hsa-miR-1287-3p	1.89e-07	7.41e-08	-11.8011	8.6682	-2.9991
hsa-miR-1289	1.89e-07	7.41e-08	-11.8011	8.6682	-2.9991
hsa-miR-1292-3p	1.89e-07	7.41e-08	-11.8011	8.6682	-2.9991
hsa-miR-1292-5p	1.89e-07	7.41e-08	-11.8011	8.6682	-2.9991
hsa-miR-1293	1.89e-07	7.41e-08	-11.8011	8.6682	-2.9991
hsa-miR-1294	1.89e-07	7.41e-08	-11.8011	8.6682	-2.9991
hsa-miR-1295b-5p	1.89e-07	7.41e-08	-11.8011	8.6682	-2.9991
hsa-miR-1297	1.89e-07	7.41e-08	-11.8011	8.6682	-2.9991
hsa-miR-1298-5p	1.89e-07	7.41e-08	-11.8011	8.6682	-2.9991
hsa-miR-1302	1.89e-07	7.41e-08	-11.8011	8.6682	-2.9991
hsa-miR-1304-5p	1.89e-07	7.41e-08	-11.8011	8.6682	-2.9991
hsa-miR-130b-5p	1.89e-07	7.41e-08	-11.8011	8.6682	-2.9991
hsa-miR-1324	1.89e-07	7.41e-08	-11.8011	8.6682	-2.9991
hsa-miR-133a-5p	1.89e-07	7.41e-08	-11.8011	8.6682	-2.9991
hsa-miR-1343-3p	1.89e-07	7.41e-08	-11.8011	8.6682	-2.9991
hsa-miR-135a-5p	1.89e-07	7.41e-08	-11.8011	8.6682	-2.9991
hsa-miR-135b-5p	1.89e-07	7.41e-08	-11.8011	8.6682	-2.9991
hsa-miR-1468-5p	1.89e-07	7.41e-08	-11.8011	8.6682	-2.9991
hsa-miR-146a-3p	1.89e-07	7.41e-08	-11.8011	8.6682	-2.9991
hsa-miR-146b-3p	1.89e-07	7.41e-08	-11.8011	8.6682	-2.9991
hsa-miR-148b-5p	1.89e-07	7.41e-08	-11.8011	8.6682	-2.9991
hsa-miR-152-5p	1.89e-07	7.41e-08	-11.8011	8.6682	-2.9991
hsa-miR-153-5p	1.89e-07	7.41e-08	-11.8011	8.6682	-2.9991
hsa-miR-1537-3p	1.89e-07	7.41e-08	-11.8011	8.6682	-2.9991
hsa-miR-1537-5p	1.89e-07	7.41e-08	-11.8011	8.6682	-2.9991
hsa-miR-155-3p	1.89e-07	7.41e-08	-11.8011	8.6682	-2.9991
hsa-miR-185-3p	1.89e-07	7.41e-08	-11.8011	8.6682	-2.9991
hsa-miR-187-3p	1.89e-07	7.41e-08	-11.8011	8.6682	-2.9991
hsa-miR-190a-3p	1.89e-07	7.41e-08	-11.8011	8.6682	-2.9991
hsa-miR-190a-5p	1.89e-07	7.41e-08	-11.8011	8.6682	-2.9991
hsa-miR-190b	1.89e-07	7.41e-08	-11.8011	8.6682	-2.9991
hsa-miR-1911-3p	1.89e-07	7.41e-08	-11.8011	8.6682	-2.9991
hsa-miR-1912	1.89e-07	7.41e-08	-11.8011	8.6682	-2.9991
hsa-miR-1976	1.89e-07	7.41e-08	-11.8011	8.6682	-2.9991
hsa-miR-19a-5p	1.89e-07	7.41e-08	-11.8011	8.6682	-2.9991
hsa-miR-19b-2-5p	1.89e-07	7.41e-08	-11.8011	8.6682	-2.9991
hsa-miR-202-5p	1.89e-07	7.41e-08	-11.8011	8.6682	-2.9991
hsa-miR-203a-5p	1.89e-07	7.41e-08	-11.8011	8.6682	-2.9991
hsa-miR-203b-5p	1.89e-07	7.41e-08	-11.8011	8.6682	-2.9991
hsa-miR-2052	1.89e-07	7.41e-08	-11.8011	8.6682	-2.9991
hsa-miR-2053	1.89e-07	7.41e-08	-11.8011	8.6682	-2.9991
hsa-miR-208a-3p	1.89e-07	7.41e-08	-11.8011	8.6682	-2.9991
hsa-miR-208b-5p	1.89e-07	7.41e-08	-11.8011	8.6682	-2.9991
hsa-miR-20b-3p	1.89e-07	7.41e-08	-11.8011	8.6682	-2.9991
hsa-miR-211-5p	1.89e-07	7.41e-08	-11.8011	8.6682	-2.9991
hsa-miR-2113	1.89e-07	7.41e-08	-11.8011	8.6682	-2.9991
hsa-miR-2115-3p	1.89e-07	7.41e-08	-11.8011	8.6682	-2.9991
hsa-miR-2115-5p	1.89e-07	7.41e-08	-11.8011	8.6682	-2.9991
hsa-miR-215-3p	1.89e-07	7.41e-08	-11.8011	8.6682	-2.9991
hsa-miR-216a-3p	1.89e-07	7.41e-08	-11.8011	8.6682	-2.9991
hsa-miR-216b-3p	1.89e-07	7.41e-08	-11.8011	8.6682	-2.9991
hsa-miR-218-1-3p	1.89e-07	7.41e-08	-11.8011	8.6682	-2.9991
hsa-miR-219a-1-3p	1.89e-07	7.41e-08	-11.8011	8.6682	-2.9991
hsa-miR-219a-2-3p	1.89e-07	7.41e-08	-11.8011	8.6682	-2.9991
hsa-miR-219b-3p	1.89e-07	7.41e-08	-11.8011	8.6682	-2.9991
hsa-miR-2276-5p	1.89e-07	7.41e-08	-11.8011	8.6682	-2.9991
hsa-miR-2467-5p	1.89e-07	7.41e-08	-11.8011	8.6682	-2.9991
hsa-miR-2682-3p	1.89e-07	7.41e-08	-11.8011	8.6682	-2.9991
hsa-miR-2682-5p	1.89e-07	7.41e-08	-11.8011	8.6682	-2.9991
hsa-miR-26a-2-3p	1.89e-07	7.41e-08	-11.8011	8.6682	-2.9991
hsa-miR-2909	1.89e-07	7.41e-08	-11.8011	8.6682	-2.9991
hsa-miR-29b-2-5p	1.89e-07	7.41e-08	-11.8011	8.6682	-2.9991
hsa-miR-301a-5p	1.89e-07	7.41e-08	-11.8011	8.6682	-2.9991
hsa-miR-301b-5p	1.89e-07	7.41e-08	-11.8011	8.6682	-2.9991
hsa-miR-302a-5p	1.89e-07	7.41e-08	-11.8011	8.6682	-2.9991
hsa-miR-302b-3p	1.89e-07	7.41e-08	-11.8011	8.6682	-2.9991
hsa-miR-302b-5p	1.89e-07	7.41e-08	-11.8011	8.6682	-2.9991
hsa-miR-302c-3p	1.89e-07	7.41e-08	-11.8011	8.6682	-2.9991
hsa-miR-302d-3p	1.89e-07	7.41e-08	-11.8011	8.6682	-2.9991
hsa-miR-302e	1.89e-07	7.41e-08	-11.8011	8.6682	-2.9991
hsa-miR-302f	1.89e-07	7.41e-08	-11.8011	8.6682	-2.9991
hsa-miR-3064-3p	1.89e-07	7.41e-08	-11.8011	8.6682	-2.9991
hsa-miR-3115	1.89e-07	7.41e-08	-11.8011	8.6682	-2.9991
hsa-miR-3117-5p	1.89e-07	7.41e-08	-11.8011	8.6682	-2.9991
hsa-miR-3118	1.89e-07	7.41e-08	-11.8011	8.6682	-2.9991
hsa-miR-3119	1.89e-07	7.41e-08	-11.8011	8.6682	-2.9991
hsa-miR-3121-5p	1.89e-07	7.41e-08	-11.8011	8.6682	-2.9991
hsa-miR-3123	1.89e-07	7.41e-08	-11.8011	8.6682	-2.9991
hsa-miR-3126-3p	1.89e-07	7.41e-08	-11.8011	8.6682	-2.9991
hsa-miR-3127-3p	1.89e-07	7.41e-08	-11.8011	8.6682	-2.9991
hsa-miR-3128	1.89e-07	7.41e-08	-11.8011	8.6682	-2.9991
hsa-miR-3129-3p	1.89e-07	7.41e-08	-11.8011	8.6682	-2.9991
hsa-miR-3129-5p	1.89e-07	7.41e-08	-11.8011	8.6682	-2.9991
hsa-miR-3133	1.89e-07	7.41e-08	-11.8011	8.6682	-2.9991
hsa-miR-3134	1.89e-07	7.41e-08	-11.8011	8.6682	-2.9991
hsa-miR-3135a	1.89e-07	7.41e-08	-11.8011	8.6682	-2.9991
hsa-miR-3136-3p	1.89e-07	7.41e-08	-11.8011	8.6682	-2.9991
hsa-miR-3139	1.89e-07	7.41e-08	-11.8011	8.6682	-2.9991
hsa-miR-3140-3p	1.89e-07	7.41e-08	-11.8011	8.6682	-2.9991
hsa-miR-3140-5p	1.89e-07	7.41e-08	-11.8011	8.6682	-2.9991
hsa-miR-3142	1.89e-07	7.41e-08	-11.8011	8.6682	-2.9991
hsa-miR-3143	1.89e-07	7.41e-08	-11.8011	8.6682	-2.9991
hsa-miR-3144-3p	1.89e-07	7.41e-08	-11.8011	8.6682	-2.9991
hsa-miR-3145-3p	1.89e-07	7.41e-08	-11.8011	8.6682	-2.9991
hsa-miR-3145-5p	1.89e-07	7.41e-08	-11.8011	8.6682	-2.9991
hsa-miR-3150a-3p	1.89e-07	7.41e-08	-11.8011	8.6682	-2.9991
hsa-miR-3150a-5p	1.89e-07	7.41e-08	-11.8011	8.6682	-2.9991
hsa-miR-3152-5p	1.89e-07	7.41e-08	-11.8011	8.6682	-2.9991
hsa-miR-3153	1.89e-07	7.41e-08	-11.8011	8.6682	-2.9991
hsa-miR-3156-3p	1.89e-07	7.41e-08	-11.8011	8.6682	-2.9991
hsa-miR-3157-3p	1.89e-07	7.41e-08	-11.8011	8.6682	-2.9991
hsa-miR-3157-5p	1.89e-07	7.41e-08	-11.8011	8.6682	-2.9991
hsa-miR-3160-5p	1.89e-07	7.41e-08	-11.8011	8.6682	-2.9991
hsa-miR-3165	1.89e-07	7.41e-08	-11.8011	8.6682	-2.9991
hsa-miR-3166	1.89e-07	7.41e-08	-11.8011	8.6682	-2.9991
hsa-miR-3167	1.89e-07	7.41e-08	-11.8011	8.6682	-2.9991
hsa-miR-3168	1.89e-07	7.41e-08	-11.8011	8.6682	-2.9991
hsa-miR-3171	1.89e-07	7.41e-08	-11.8011	8.6682	-2.9991
hsa-miR-3173-5p	1.89e-07	7.41e-08	-11.8011	8.6682	-2.9991
hsa-miR-3179	1.89e-07	7.41e-08	-11.8011	8.6682	-2.9991
hsa-miR-3184-5p	1.89e-07	7.41e-08	-11.8011	8.6682	-2.9991
hsa-miR-3186-5p	1.89e-07	7.41e-08	-11.8011	8.6682	-2.9991
hsa-miR-3191-3p	1.89e-07	7.41e-08	-11.8011	8.6682	-2.9991
hsa-miR-3192-3p	1.89e-07	7.41e-08	-11.8011	8.6682	-2.9991
hsa-miR-3199	1.89e-07	7.41e-08	-11.8011	8.6682	-2.9991
hsa-miR-3200-3p	1.89e-07	7.41e-08	-11.8011	8.6682	-2.9991
hsa-miR-3201	1.89e-07	7.41e-08	-11.8011	8.6682	-2.9991
hsa-miR-323b-3p	1.89e-07	7.41e-08	-11.8011	8.6682	-2.9991
hsa-miR-329-5p	1.89e-07	7.41e-08	-11.8011	8.6682	-2.9991
hsa-miR-337-3p	1.89e-07	7.41e-08	-11.8011	8.6682	-2.9991
hsa-miR-346	1.89e-07	7.41e-08	-11.8011	8.6682	-2.9991
hsa-miR-3529-3p	1.89e-07	7.41e-08	-11.8011	8.6682	-2.9991
hsa-miR-3529-5p	1.89e-07	7.41e-08	-11.8011	8.6682	-2.9991
hsa-miR-3591-3p	1.89e-07	7.41e-08	-11.8011	8.6682	-2.9991
hsa-miR-3591-5p	1.89e-07	7.41e-08	-11.8011	8.6682	-2.9991
hsa-miR-3605-3p	1.89e-07	7.41e-08	-11.8011	8.6682	-2.9991
hsa-miR-3606-3p	1.89e-07	7.41e-08	-11.8011	8.6682	-2.9991
hsa-miR-3606-5p	1.89e-07	7.41e-08	-11.8011	8.6682	-2.9991
hsa-miR-3609	1.89e-07	7.41e-08	-11.8011	8.6682	-2.9991
hsa-miR-3613-5p	1.89e-07	7.41e-08	-11.8011	8.6682	-2.9991
hsa-miR-3616-5p	1.89e-07	7.41e-08	-11.8011	8.6682	-2.9991
hsa-miR-3617-3p	1.89e-07	7.41e-08	-11.8011	8.6682	-2.9991
hsa-miR-3619-3p	1.89e-07	7.41e-08	-11.8011	8.6682	-2.9991
hsa-miR-363-5p	1.89e-07	7.41e-08	-11.8011	8.6682	-2.9991
hsa-miR-3653-5p	1.89e-07	7.41e-08	-11.8011	8.6682	-2.9991
hsa-miR-3657	1.89e-07	7.41e-08	-11.8011	8.6682	-2.9991
hsa-miR-3661	1.89e-07	7.41e-08	-11.8011	8.6682	-2.9991
hsa-miR-3664-5p	1.89e-07	7.41e-08	-11.8011	8.6682	-2.9991
hsa-miR-3667-3p	1.89e-07	7.41e-08	-11.8011	8.6682	-2.9991
hsa-miR-3668	1.89e-07	7.41e-08	-11.8011	8.6682	-2.9991
hsa-miR-367-5p	1.89e-07	7.41e-08	-11.8011	8.6682	-2.9991
hsa-miR-3670	1.89e-07	7.41e-08	-11.8011	8.6682	-2.9991
hsa-miR-3671	1.89e-07	7.41e-08	-11.8011	8.6682	-2.9991
hsa-miR-3672	1.89e-07	7.41e-08	-11.8011	8.6682	-2.9991
hsa-miR-3674	1.89e-07	7.41e-08	-11.8011	8.6682	-2.9991
hsa-miR-3675-5p	1.89e-07	7.41e-08	-11.8011	8.6682	-2.9991
hsa-miR-3677-5p	1.89e-07	7.41e-08	-11.8011	8.6682	-2.9991
hsa-miR-3681-3p	1.89e-07	7.41e-08	-11.8011	8.6682	-2.9991
hsa-miR-3681-5p	1.89e-07	7.41e-08	-11.8011	8.6682	-2.9991
hsa-miR-3682-5p	1.89e-07	7.41e-08	-11.8011	8.6682	-2.9991
hsa-miR-3683	1.89e-07	7.41e-08	-11.8011	8.6682	-2.9991
hsa-miR-3684	1.89e-07	7.41e-08	-11.8011	8.6682	-2.9991
hsa-miR-3688-3p	1.89e-07	7.41e-08	-11.8011	8.6682	-2.9991
hsa-miR-3688-5p	1.89e-07	7.41e-08	-11.8011	8.6682	-2.9991
hsa-miR-3689d	1.89e-07	7.41e-08	-11.8011	8.6682	-2.9991
hsa-miR-369-3p	1.89e-07	7.41e-08	-11.8011	8.6682	-2.9991
hsa-miR-3691-3p	1.89e-07	7.41e-08	-11.8011	8.6682	-2.9991
hsa-miR-3692-3p	1.89e-07	7.41e-08	-11.8011	8.6682	-2.9991
hsa-miR-370-5p	1.89e-07	7.41e-08	-11.8011	8.6682	-2.9991
hsa-miR-371b-3p	1.89e-07	7.41e-08	-11.8011	8.6682	-2.9991
hsa-miR-374a-3p	1.89e-07	7.41e-08	-11.8011	8.6682	-2.9991
hsa-miR-374b-3p	1.89e-07	7.41e-08	-11.8011	8.6682	-2.9991
hsa-miR-374c-3p	1.89e-07	7.41e-08	-11.8011	8.6682	-2.9991
hsa-miR-376a-2-5p	1.89e-07	7.41e-08	-11.8011	8.6682	-2.9991
hsa-miR-376b-5p	1.89e-07	7.41e-08	-11.8011	8.6682	-2.9991
hsa-miR-376c-5p	1.89e-07	7.41e-08	-11.8011	8.6682	-2.9991
hsa-miR-379-3p	1.89e-07	7.41e-08	-11.8011	8.6682	-2.9991
hsa-miR-380-3p	1.89e-07	7.41e-08	-11.8011	8.6682	-2.9991
hsa-miR-383-3p	1.89e-07	7.41e-08	-11.8011	8.6682	-2.9991
hsa-miR-384	1.89e-07	7.41e-08	-11.8011	8.6682	-2.9991
hsa-miR-3908	1.89e-07	7.41e-08	-11.8011	8.6682	-2.9991
hsa-miR-3910	1.89e-07	7.41e-08	-11.8011	8.6682	-2.9991
hsa-miR-3912-3p	1.89e-07	7.41e-08	-11.8011	8.6682	-2.9991
hsa-miR-3913-3p	1.89e-07	7.41e-08	-11.8011	8.6682	-2.9991
hsa-miR-3913-5p	1.89e-07	7.41e-08	-11.8011	8.6682	-2.9991
hsa-miR-3916	1.89e-07	7.41e-08	-11.8011	8.6682	-2.9991
hsa-miR-3920	1.89e-07	7.41e-08	-11.8011	8.6682	-2.9991
hsa-miR-3922-3p	1.89e-07	7.41e-08	-11.8011	8.6682	-2.9991
hsa-miR-3924	1.89e-07	7.41e-08	-11.8011	8.6682	-2.9991
hsa-miR-3925-3p	1.89e-07	7.41e-08	-11.8011	8.6682	-2.9991
hsa-miR-3927-3p	1.89e-07	7.41e-08	-11.8011	8.6682	-2.9991
hsa-miR-3927-5p	1.89e-07	7.41e-08	-11.8011	8.6682	-2.9991
hsa-miR-3929	1.89e-07	7.41e-08	-11.8011	8.6682	-2.9991
hsa-miR-3942-3p	1.89e-07	7.41e-08	-11.8011	8.6682	-2.9991
hsa-miR-3973	1.89e-07	7.41e-08	-11.8011	8.6682	-2.9991
hsa-miR-3974	1.89e-07	7.41e-08	-11.8011	8.6682	-2.9991
hsa-miR-3975	1.89e-07	7.41e-08	-11.8011	8.6682	-2.9991
hsa-miR-3977	1.89e-07	7.41e-08	-11.8011	8.6682	-2.9991
hsa-miR-410-5p	1.89e-07	7.41e-08	-11.8011	8.6682	-2.9991
hsa-miR-411-3p	1.89e-07	7.41e-08	-11.8011	8.6682	-2.9991
hsa-miR-412-3p	1.89e-07	7.41e-08	-11.8011	8.6682	-2.9991
hsa-miR-412-5p	1.89e-07	7.41e-08	-11.8011	8.6682	-2.9991
hsa-miR-4258	1.89e-07	7.41e-08	-11.8011	8.6682	-2.9991
hsa-miR-4262	1.89e-07	7.41e-08	-11.8011	8.6682	-2.9991
hsa-miR-4263	1.89e-07	7.41e-08	-11.8011	8.6682	-2.9991
hsa-miR-4264	1.89e-07	7.41e-08	-11.8011	8.6682	-2.9991
hsa-miR-4268	1.89e-07	7.41e-08	-11.8011	8.6682	-2.9991
hsa-miR-4272	1.89e-07	7.41e-08	-11.8011	8.6682	-2.9991
hsa-miR-4273	1.89e-07	7.41e-08	-11.8011	8.6682	-2.9991
hsa-miR-4275	1.89e-07	7.41e-08	-11.8011	8.6682	-2.9991
hsa-miR-4276	1.89e-07	7.41e-08	-11.8011	8.6682	-2.9991
hsa-miR-4282	1.89e-07	7.41e-08	-11.8011	8.6682	-2.9991
hsa-miR-4285	1.89e-07	7.41e-08	-11.8011	8.6682	-2.9991
hsa-miR-4295	1.89e-07	7.41e-08	-11.8011	8.6682	-2.9991
hsa-miR-4302	1.89e-07	7.41e-08	-11.8011	8.6682	-2.9991
hsa-miR-4305	1.89e-07	7.41e-08	-11.8011	8.6682	-2.9991
hsa-miR-4307	1.89e-07	7.41e-08	-11.8011	8.6682	-2.9991
hsa-miR-4308	1.89e-07	7.41e-08	-11.8011	8.6682	-2.9991
hsa-miR-4318	1.89e-07	7.41e-08	-11.8011	8.6682	-2.9991
hsa-miR-4320	1.89e-07	7.41e-08	-11.8011	8.6682	-2.9991
hsa-miR-4325	1.89e-07	7.41e-08	-11.8011	8.6682	-2.9991
hsa-miR-4326	1.89e-07	7.41e-08	-11.8011	8.6682	-2.9991
hsa-miR-433-3p	1.89e-07	7.41e-08	-11.8011	8.6682	-2.9991
hsa-miR-433-5p	1.89e-07	7.41e-08	-11.8011	8.6682	-2.9991
hsa-miR-4423-5p	1.89e-07	7.41e-08	-11.8011	8.6682	-2.9991
hsa-miR-4424	1.89e-07	7.41e-08	-11.8011	8.6682	-2.9991
hsa-miR-4426	1.89e-07	7.41e-08	-11.8011	8.6682	-2.9991
hsa-miR-4427	1.89e-07	7.41e-08	-11.8011	8.6682	-2.9991
hsa-miR-4431	1.89e-07	7.41e-08	-11.8011	8.6682	-2.9991
hsa-miR-4438	1.89e-07	7.41e-08	-11.8011	8.6682	-2.9991
hsa-miR-4445-5p	1.89e-07	7.41e-08	-11.8011	8.6682	-2.9991
hsa-miR-4446-5p	1.89e-07	7.41e-08	-11.8011	8.6682	-2.9991
hsa-miR-4452	1.89e-07	7.41e-08	-11.8011	8.6682	-2.9991
hsa-miR-4457	1.89e-07	7.41e-08	-11.8011	8.6682	-2.9991
hsa-miR-4460	1.89e-07	7.41e-08	-11.8011	8.6682	-2.9991
hsa-miR-4464	1.89e-07	7.41e-08	-11.8011	8.6682	-2.9991
hsa-miR-4467	1.89e-07	7.41e-08	-11.8011	8.6682	-2.9991
hsa-miR-4469	1.89e-07	7.41e-08	-11.8011	8.6682	-2.9991
hsa-miR-4473	1.89e-07	7.41e-08	-11.8011	8.6682	-2.9991
hsa-miR-4474-5p	1.89e-07	7.41e-08	-11.8011	8.6682	-2.9991
hsa-miR-4477a	1.89e-07	7.41e-08	-11.8011	8.6682	-2.9991
hsa-miR-4477b	1.89e-07	7.41e-08	-11.8011	8.6682	-2.9991
hsa-miR-448	1.89e-07	7.41e-08	-11.8011	8.6682	-2.9991
hsa-miR-4490	1.89e-07	7.41e-08	-11.8011	8.6682	-2.9991
hsa-miR-4493	1.89e-07	7.41e-08	-11.8011	8.6682	-2.9991
hsa-miR-4495	1.89e-07	7.41e-08	-11.8011	8.6682	-2.9991
hsa-miR-449c-3p	1.89e-07	7.41e-08	-11.8011	8.6682	-2.9991
hsa-miR-4503	1.89e-07	7.41e-08	-11.8011	8.6682	-2.9991
hsa-miR-4504	1.89e-07	7.41e-08	-11.8011	8.6682	-2.9991
hsa-miR-4509	1.89e-07	7.41e-08	-11.8011	8.6682	-2.9991
hsa-miR-450a-1-3p	1.89e-07	7.41e-08	-11.8011	8.6682	-2.9991
hsa-miR-450a-2-3p	1.89e-07	7.41e-08	-11.8011	8.6682	-2.9991
hsa-miR-450b-5p	1.89e-07	7.41e-08	-11.8011	8.6682	-2.9991
hsa-miR-4512	1.89e-07	7.41e-08	-11.8011	8.6682	-2.9991
hsa-miR-4517	1.89e-07	7.41e-08	-11.8011	8.6682	-2.9991
hsa-miR-452-3p	1.89e-07	7.41e-08	-11.8011	8.6682	-2.9991
hsa-miR-4520-5p	1.89e-07	7.41e-08	-11.8011	8.6682	-2.9991
hsa-miR-4523	1.89e-07	7.41e-08	-11.8011	8.6682	-2.9991
hsa-miR-4524a-3p	1.89e-07	7.41e-08	-11.8011	8.6682	-2.9991
hsa-miR-4524a-5p	1.89e-07	7.41e-08	-11.8011	8.6682	-2.9991
hsa-miR-4524b-3p	1.89e-07	7.41e-08	-11.8011	8.6682	-2.9991
hsa-miR-4527	1.89e-07	7.41e-08	-11.8011	8.6682	-2.9991
hsa-miR-4528	1.89e-07	7.41e-08	-11.8011	8.6682	-2.9991
hsa-miR-4529-5p	1.89e-07	7.41e-08	-11.8011	8.6682	-2.9991
hsa-miR-4536-3p	1.89e-07	7.41e-08	-11.8011	8.6682	-2.9991
hsa-miR-4536-5p	1.89e-07	7.41e-08	-11.8011	8.6682	-2.9991
hsa-miR-4537	1.89e-07	7.41e-08	-11.8011	8.6682	-2.9991
hsa-miR-454-5p	1.89e-07	7.41e-08	-11.8011	8.6682	-2.9991
hsa-miR-4540	1.89e-07	7.41e-08	-11.8011	8.6682	-2.9991
hsa-miR-4632-3p	1.89e-07	7.41e-08	-11.8011	8.6682	-2.9991
hsa-miR-4633-3p	1.89e-07	7.41e-08	-11.8011	8.6682	-2.9991
hsa-miR-4637	1.89e-07	7.41e-08	-11.8011	8.6682	-2.9991
hsa-miR-4639-3p	1.89e-07	7.41e-08	-11.8011	8.6682	-2.9991
hsa-miR-4641	1.89e-07	7.41e-08	-11.8011	8.6682	-2.9991
hsa-miR-4643	1.89e-07	7.41e-08	-11.8011	8.6682	-2.9991
hsa-miR-4650-5p	1.89e-07	7.41e-08	-11.8011	8.6682	-2.9991
hsa-miR-4652-5p	1.89e-07	7.41e-08	-11.8011	8.6682	-2.9991
hsa-miR-466	1.89e-07	7.41e-08	-11.8011	8.6682	-2.9991
hsa-miR-4661-3p	1.89e-07	7.41e-08	-11.8011	8.6682	-2.9991
hsa-miR-4662a-3p	1.89e-07	7.41e-08	-11.8011	8.6682	-2.9991
hsa-miR-4662a-5p	1.89e-07	7.41e-08	-11.8011	8.6682	-2.9991
hsa-miR-4662b	1.89e-07	7.41e-08	-11.8011	8.6682	-2.9991
hsa-miR-4663	1.89e-07	7.41e-08	-11.8011	8.6682	-2.9991
hsa-miR-4664-5p	1.89e-07	7.41e-08	-11.8011	8.6682	-2.9991
hsa-miR-4666a-3p	1.89e-07	7.41e-08	-11.8011	8.6682	-2.9991
hsa-miR-4666a-5p	1.89e-07	7.41e-08	-11.8011	8.6682	-2.9991
hsa-miR-4668-3p	1.89e-07	7.41e-08	-11.8011	8.6682	-2.9991
hsa-miR-4670-3p	1.89e-07	7.41e-08	-11.8011	8.6682	-2.9991
hsa-miR-4670-5p	1.89e-07	7.41e-08	-11.8011	8.6682	-2.9991
hsa-miR-4671-3p	1.89e-07	7.41e-08	-11.8011	8.6682	-2.9991
hsa-miR-4671-5p	1.89e-07	7.41e-08	-11.8011	8.6682	-2.9991
hsa-miR-4676-3p	1.89e-07	7.41e-08	-11.8011	8.6682	-2.9991
hsa-miR-4677-5p	1.89e-07	7.41e-08	-11.8011	8.6682	-2.9991
hsa-miR-4678	1.89e-07	7.41e-08	-11.8011	8.6682	-2.9991
hsa-miR-4679	1.89e-07	7.41e-08	-11.8011	8.6682	-2.9991
hsa-miR-4680-3p	1.89e-07	7.41e-08	-11.8011	8.6682	-2.9991
hsa-miR-4680-5p	1.89e-07	7.41e-08	-11.8011	8.6682	-2.9991
hsa-miR-4681	1.89e-07	7.41e-08	-11.8011	8.6682	-2.9991
hsa-miR-4684-5p	1.89e-07	7.41e-08	-11.8011	8.6682	-2.9991
hsa-miR-4693-3p	1.89e-07	7.41e-08	-11.8011	8.6682	-2.9991
hsa-miR-4693-5p	1.89e-07	7.41e-08	-11.8011	8.6682	-2.9991
hsa-miR-4694-5p	1.89e-07	7.41e-08	-11.8011	8.6682	-2.9991
hsa-miR-4699-3p	1.89e-07	7.41e-08	-11.8011	8.6682	-2.9991
hsa-miR-4699-5p	1.89e-07	7.41e-08	-11.8011	8.6682	-2.9991
hsa-miR-4703-3p	1.89e-07	7.41e-08	-11.8011	8.6682	-2.9991
hsa-miR-4703-5p	1.89e-07	7.41e-08	-11.8011	8.6682	-2.9991
hsa-miR-4704-3p	1.89e-07	7.41e-08	-11.8011	8.6682	-2.9991
hsa-miR-4705	1.89e-07	7.41e-08	-11.8011	8.6682	-2.9991
hsa-miR-4708-5p	1.89e-07	7.41e-08	-11.8011	8.6682	-2.9991
hsa-miR-4709-5p	1.89e-07	7.41e-08	-11.8011	8.6682	-2.9991
hsa-miR-4711-3p	1.89e-07	7.41e-08	-11.8011	8.6682	-2.9991
hsa-miR-4712-5p	1.89e-07	7.41e-08	-11.8011	8.6682	-2.9991
hsa-miR-4715-3p	1.89e-07	7.41e-08	-11.8011	8.6682	-2.9991
hsa-miR-4719	1.89e-07	7.41e-08	-11.8011	8.6682	-2.9991
hsa-miR-4720-3p	1.89e-07	7.41e-08	-11.8011	8.6682	-2.9991
hsa-miR-4720-5p	1.89e-07	7.41e-08	-11.8011	8.6682	-2.9991
hsa-miR-4722-3p	1.89e-07	7.41e-08	-11.8011	8.6682	-2.9991
hsa-miR-4724-3p	1.89e-07	7.41e-08	-11.8011	8.6682	-2.9991
hsa-miR-4727-5p	1.89e-07	7.41e-08	-11.8011	8.6682	-2.9991
hsa-miR-4731-5p	1.89e-07	7.41e-08	-11.8011	8.6682	-2.9991
hsa-miR-4733-3p	1.89e-07	7.41e-08	-11.8011	8.6682	-2.9991
hsa-miR-4735-3p	1.89e-07	7.41e-08	-11.8011	8.6682	-2.9991
hsa-miR-4735-5p	1.89e-07	7.41e-08	-11.8011	8.6682	-2.9991
hsa-miR-4738-5p	1.89e-07	7.41e-08	-11.8011	8.6682	-2.9991
hsa-miR-4742-3p	1.89e-07	7.41e-08	-11.8011	8.6682	-2.9991
hsa-miR-4743-3p	1.89e-07	7.41e-08	-11.8011	8.6682	-2.9991
hsa-miR-4744	1.89e-07	7.41e-08	-11.8011	8.6682	-2.9991
hsa-miR-4745-3p	1.89e-07	7.41e-08	-11.8011	8.6682	-2.9991
hsa-miR-4747-3p	1.89e-07	7.41e-08	-11.8011	8.6682	-2.9991
hsa-miR-4753-3p	1.89e-07	7.41e-08	-11.8011	8.6682	-2.9991
hsa-miR-4755-5p	1.89e-07	7.41e-08	-11.8011	8.6682	-2.9991
hsa-miR-4756-5p	1.89e-07	7.41e-08	-11.8011	8.6682	-2.9991
hsa-miR-4757-3p	1.89e-07	7.41e-08	-11.8011	8.6682	-2.9991
hsa-miR-4757-5p	1.89e-07	7.41e-08	-11.8011	8.6682	-2.9991
hsa-miR-4759	1.89e-07	7.41e-08	-11.8011	8.6682	-2.9991
hsa-miR-4760-3p	1.89e-07	7.41e-08	-11.8011	8.6682	-2.9991
hsa-miR-4760-5p	1.89e-07	7.41e-08	-11.8011	8.6682	-2.9991
hsa-miR-4761-3p	1.89e-07	7.41e-08	-11.8011	8.6682	-2.9991
hsa-miR-4761-5p	1.89e-07	7.41e-08	-11.8011	8.6682	-2.9991
hsa-miR-4762-5p	1.89e-07	7.41e-08	-11.8011	8.6682	-2.9991
hsa-miR-4764-3p	1.89e-07	7.41e-08	-11.8011	8.6682	-2.9991
hsa-miR-4765	1.89e-07	7.41e-08	-11.8011	8.6682	-2.9991
hsa-miR-4768-5p	1.89e-07	7.41e-08	-11.8011	8.6682	-2.9991
hsa-miR-4771	1.89e-07	7.41e-08	-11.8011	8.6682	-2.9991
hsa-miR-4772-3p	1.89e-07	7.41e-08	-11.8011	8.6682	-2.9991
hsa-miR-4772-5p	1.89e-07	7.41e-08	-11.8011	8.6682	-2.9991
hsa-miR-4774-3p	1.89e-07	7.41e-08	-11.8011	8.6682	-2.9991
hsa-miR-4775	1.89e-07	7.41e-08	-11.8011	8.6682	-2.9991
hsa-miR-4776-3p	1.89e-07	7.41e-08	-11.8011	8.6682	-2.9991
hsa-miR-4777-3p	1.89e-07	7.41e-08	-11.8011	8.6682	-2.9991
hsa-miR-4777-5p	1.89e-07	7.41e-08	-11.8011	8.6682	-2.9991
hsa-miR-4778-3p	1.89e-07	7.41e-08	-11.8011	8.6682	-2.9991
hsa-miR-4781-3p	1.89e-07	7.41e-08	-11.8011	8.6682	-2.9991
hsa-miR-4782-3p	1.89e-07	7.41e-08	-11.8011	8.6682	-2.9991
hsa-miR-4782-5p	1.89e-07	7.41e-08	-11.8011	8.6682	-2.9991
hsa-miR-4789-3p	1.89e-07	7.41e-08	-11.8011	8.6682	-2.9991
hsa-miR-4789-5p	1.89e-07	7.41e-08	-11.8011	8.6682	-2.9991
hsa-miR-4790-5p	1.89e-07	7.41e-08	-11.8011	8.6682	-2.9991
hsa-miR-4794	1.89e-07	7.41e-08	-11.8011	8.6682	-2.9991
hsa-miR-4795-3p	1.89e-07	7.41e-08	-11.8011	8.6682	-2.9991
hsa-miR-4795-5p	1.89e-07	7.41e-08	-11.8011	8.6682	-2.9991
hsa-miR-4796-3p	1.89e-07	7.41e-08	-11.8011	8.6682	-2.9991
hsa-miR-4796-5p	1.89e-07	7.41e-08	-11.8011	8.6682	-2.9991
hsa-miR-4797-3p	1.89e-07	7.41e-08	-11.8011	8.6682	-2.9991
hsa-miR-4798-3p	1.89e-07	7.41e-08	-11.8011	8.6682	-2.9991
hsa-miR-4798-5p	1.89e-07	7.41e-08	-11.8011	8.6682	-2.9991
hsa-miR-4799-3p	1.89e-07	7.41e-08	-11.8011	8.6682	-2.9991
hsa-miR-4799-5p	1.89e-07	7.41e-08	-11.8011	8.6682	-2.9991
hsa-miR-4800-3p	1.89e-07	7.41e-08	-11.8011	8.6682	-2.9991
hsa-miR-4802-5p	1.89e-07	7.41e-08	-11.8011	8.6682	-2.9991
hsa-miR-4804-3p	1.89e-07	7.41e-08	-11.8011	8.6682	-2.9991
hsa-miR-4804-5p	1.89e-07	7.41e-08	-11.8011	8.6682	-2.9991
hsa-miR-487a-5p	1.89e-07	7.41e-08	-11.8011	8.6682	-2.9991
hsa-miR-487b-5p	1.89e-07	7.41e-08	-11.8011	8.6682	-2.9991
hsa-miR-488-3p	1.89e-07	7.41e-08	-11.8011	8.6682	-2.9991
hsa-miR-488-5p	1.89e-07	7.41e-08	-11.8011	8.6682	-2.9991
hsa-miR-494-5p	1.89e-07	7.41e-08	-11.8011	8.6682	-2.9991
hsa-miR-495-5p	1.89e-07	7.41e-08	-11.8011	8.6682	-2.9991
hsa-miR-496	1.89e-07	7.41e-08	-11.8011	8.6682	-2.9991
hsa-miR-497-3p	1.89e-07	7.41e-08	-11.8011	8.6682	-2.9991
hsa-miR-4999-3p	1.89e-07	7.41e-08	-11.8011	8.6682	-2.9991
hsa-miR-499a-5p	1.89e-07	7.41e-08	-11.8011	8.6682	-2.9991
hsa-miR-499b-3p	1.89e-07	7.41e-08	-11.8011	8.6682	-2.9991
hsa-miR-499b-5p	1.89e-07	7.41e-08	-11.8011	8.6682	-2.9991
hsa-miR-5001-3p	1.89e-07	7.41e-08	-11.8011	8.6682	-2.9991
hsa-miR-5004-5p	1.89e-07	7.41e-08	-11.8011	8.6682	-2.9991
hsa-miR-5006-3p	1.89e-07	7.41e-08	-11.8011	8.6682	-2.9991
hsa-miR-5007-3p	1.89e-07	7.41e-08	-11.8011	8.6682	-2.9991
hsa-miR-5007-5p	1.89e-07	7.41e-08	-11.8011	8.6682	-2.9991
hsa-miR-5009-3p	1.89e-07	7.41e-08	-11.8011	8.6682	-2.9991
hsa-miR-5011-3p	1.89e-07	7.41e-08	-11.8011	8.6682	-2.9991
hsa-miR-504-5p	1.89e-07	7.41e-08	-11.8011	8.6682	-2.9991
hsa-miR-5047	1.89e-07	7.41e-08	-11.8011	8.6682	-2.9991
hsa-miR-5087	1.89e-07	7.41e-08	-11.8011	8.6682	-2.9991
hsa-miR-5089-5p	1.89e-07	7.41e-08	-11.8011	8.6682	-2.9991
hsa-miR-509-3p	1.89e-07	7.41e-08	-11.8011	8.6682	-2.9991
hsa-miR-511-5p	1.89e-07	7.41e-08	-11.8011	8.6682	-2.9991
hsa-miR-514a-3p	1.89e-07	7.41e-08	-11.8011	8.6682	-2.9991
hsa-miR-515-3p	1.89e-07	7.41e-08	-11.8011	8.6682	-2.9991
hsa-miR-515-5p	1.89e-07	7.41e-08	-11.8011	8.6682	-2.9991
hsa-miR-517a-3p	1.89e-07	7.41e-08	-11.8011	8.6682	-2.9991
hsa-miR-517c-3p	1.89e-07	7.41e-08	-11.8011	8.6682	-2.9991
hsa-miR-5186	1.89e-07	7.41e-08	-11.8011	8.6682	-2.9991
hsa-miR-5187-3p	1.89e-07	7.41e-08	-11.8011	8.6682	-2.9991
hsa-miR-518a-3p	1.89e-07	7.41e-08	-11.8011	8.6682	-2.9991
hsa-miR-518c-3p	1.89e-07	7.41e-08	-11.8011	8.6682	-2.9991
hsa-miR-518e-3p	1.89e-07	7.41e-08	-11.8011	8.6682	-2.9991
hsa-miR-518f-3p	1.89e-07	7.41e-08	-11.8011	8.6682	-2.9991
hsa-miR-5193	1.89e-07	7.41e-08	-11.8011	8.6682	-2.9991
hsa-miR-519b-3p	1.89e-07	7.41e-08	-11.8011	8.6682	-2.9991
hsa-miR-520a-3p	1.89e-07	7.41e-08	-11.8011	8.6682	-2.9991
hsa-miR-520f-5p	1.89e-07	7.41e-08	-11.8011	8.6682	-2.9991
hsa-miR-520g-3p	1.89e-07	7.41e-08	-11.8011	8.6682	-2.9991
hsa-miR-520g-5p	1.89e-07	7.41e-08	-11.8011	8.6682	-2.9991
hsa-miR-520h	1.89e-07	7.41e-08	-11.8011	8.6682	-2.9991
hsa-miR-521	1.89e-07	7.41e-08	-11.8011	8.6682	-2.9991
hsa-miR-522-3p	1.89e-07	7.41e-08	-11.8011	8.6682	-2.9991
hsa-miR-524-3p	1.89e-07	7.41e-08	-11.8011	8.6682	-2.9991
hsa-miR-525-3p	1.89e-07	7.41e-08	-11.8011	8.6682	-2.9991
hsa-miR-539-3p	1.89e-07	7.41e-08	-11.8011	8.6682	-2.9991
hsa-miR-544a	1.89e-07	7.41e-08	-11.8011	8.6682	-2.9991
hsa-miR-544b	1.89e-07	7.41e-08	-11.8011	8.6682	-2.9991
hsa-miR-545-5p	1.89e-07	7.41e-08	-11.8011	8.6682	-2.9991
hsa-miR-548a-3p	1.89e-07	7.41e-08	-11.8011	8.6682	-2.9991
hsa-miR-548a-5p	1.89e-07	7.41e-08	-11.8011	8.6682	-2.9991
hsa-miR-548ab	1.89e-07	7.41e-08	-11.8011	8.6682	-2.9991
hsa-miR-548ac	1.89e-07	7.41e-08	-11.8011	8.6682	-2.9991
hsa-miR-548ad-5p	1.89e-07	7.41e-08	-11.8011	8.6682	-2.9991
hsa-miR-548ag	1.89e-07	7.41e-08	-11.8011	8.6682	-2.9991
hsa-miR-548ah-5p	1.89e-07	7.41e-08	-11.8011	8.6682	-2.9991
hsa-miR-548aj-5p	1.89e-07	7.41e-08	-11.8011	8.6682	-2.9991
hsa-miR-548ak	1.89e-07	7.41e-08	-11.8011	8.6682	-2.9991
hsa-miR-548al	1.89e-07	7.41e-08	-11.8011	8.6682	-2.9991
hsa-miR-548am-3p	1.89e-07	7.41e-08	-11.8011	8.6682	-2.9991
hsa-miR-548an	1.89e-07	7.41e-08	-11.8011	8.6682	-2.9991
hsa-miR-548ao-5p	1.89e-07	7.41e-08	-11.8011	8.6682	-2.9991
hsa-miR-548ap-5p	1.89e-07	7.41e-08	-11.8011	8.6682	-2.9991
hsa-miR-548aq-5p	1.89e-07	7.41e-08	-11.8011	8.6682	-2.9991
hsa-miR-548ar-3p	1.89e-07	7.41e-08	-11.8011	8.6682	-2.9991
hsa-miR-548ar-5p	1.89e-07	7.41e-08	-11.8011	8.6682	-2.9991
hsa-miR-548as-3p	1.89e-07	7.41e-08	-11.8011	8.6682	-2.9991
hsa-miR-548as-5p	1.89e-07	7.41e-08	-11.8011	8.6682	-2.9991
hsa-miR-548at-3p	1.89e-07	7.41e-08	-11.8011	8.6682	-2.9991
hsa-miR-548at-5p	1.89e-07	7.41e-08	-11.8011	8.6682	-2.9991
hsa-miR-548au-3p	1.89e-07	7.41e-08	-11.8011	8.6682	-2.9991
hsa-miR-548au-5p	1.89e-07	7.41e-08	-11.8011	8.6682	-2.9991
hsa-miR-548av-3p	1.89e-07	7.41e-08	-11.8011	8.6682	-2.9991
hsa-miR-548av-5p	1.89e-07	7.41e-08	-11.8011	8.6682	-2.9991
hsa-miR-548ax	1.89e-07	7.41e-08	-11.8011	8.6682	-2.9991
hsa-miR-548ay-3p	1.89e-07	7.41e-08	-11.8011	8.6682	-2.9991
hsa-miR-548ay-5p	1.89e-07	7.41e-08	-11.8011	8.6682	-2.9991
hsa-miR-548az-3p	1.89e-07	7.41e-08	-11.8011	8.6682	-2.9991
hsa-miR-548az-5p	1.89e-07	7.41e-08	-11.8011	8.6682	-2.9991
hsa-miR-548b-3p	1.89e-07	7.41e-08	-11.8011	8.6682	-2.9991
hsa-miR-548b-5p	1.89e-07	7.41e-08	-11.8011	8.6682	-2.9991
hsa-miR-548ba	1.89e-07	7.41e-08	-11.8011	8.6682	-2.9991
hsa-miR-548bb-3p	1.89e-07	7.41e-08	-11.8011	8.6682	-2.9991
hsa-miR-548bb-5p	1.89e-07	7.41e-08	-11.8011	8.6682	-2.9991
hsa-miR-548d-3p	1.89e-07	7.41e-08	-11.8011	8.6682	-2.9991
hsa-miR-548d-5p	1.89e-07	7.41e-08	-11.8011	8.6682	-2.9991
hsa-miR-548e-5p	1.89e-07	7.41e-08	-11.8011	8.6682	-2.9991
hsa-miR-548f-5p	1.89e-07	7.41e-08	-11.8011	8.6682	-2.9991
hsa-miR-548h-3p	1.89e-07	7.41e-08	-11.8011	8.6682	-2.9991
hsa-miR-548h-5p	1.89e-07	7.41e-08	-11.8011	8.6682	-2.9991
hsa-miR-548i	1.89e-07	7.41e-08	-11.8011	8.6682	-2.9991
hsa-miR-548j-3p	1.89e-07	7.41e-08	-11.8011	8.6682	-2.9991
hsa-miR-548k	1.89e-07	7.41e-08	-11.8011	8.6682	-2.9991
hsa-miR-548l	1.89e-07	7.41e-08	-11.8011	8.6682	-2.9991
hsa-miR-548m	1.89e-07	7.41e-08	-11.8011	8.6682	-2.9991
hsa-miR-548n	1.89e-07	7.41e-08	-11.8011	8.6682	-2.9991
hsa-miR-548p	1.89e-07	7.41e-08	-11.8011	8.6682	-2.9991
hsa-miR-548s	1.89e-07	7.41e-08	-11.8011	8.6682	-2.9991
hsa-miR-548t-5p	1.89e-07	7.41e-08	-11.8011	8.6682	-2.9991
hsa-miR-548w	1.89e-07	7.41e-08	-11.8011	8.6682	-2.9991
hsa-miR-548y	1.89e-07	7.41e-08	-11.8011	8.6682	-2.9991
hsa-miR-550b-3p	1.89e-07	7.41e-08	-11.8011	8.6682	-2.9991
hsa-miR-552-3p	1.89e-07	7.41e-08	-11.8011	8.6682	-2.9991
hsa-miR-552-5p	1.89e-07	7.41e-08	-11.8011	8.6682	-2.9991
hsa-miR-553	1.89e-07	7.41e-08	-11.8011	8.6682	-2.9991
hsa-miR-554	1.89e-07	7.41e-08	-11.8011	8.6682	-2.9991
hsa-miR-555	1.89e-07	7.41e-08	-11.8011	8.6682	-2.9991
hsa-miR-556-3p	1.89e-07	7.41e-08	-11.8011	8.6682	-2.9991
hsa-miR-556-5p	1.89e-07	7.41e-08	-11.8011	8.6682	-2.9991
hsa-miR-5579-3p	1.89e-07	7.41e-08	-11.8011	8.6682	-2.9991
hsa-miR-5579-5p	1.89e-07	7.41e-08	-11.8011	8.6682	-2.9991
hsa-miR-558	1.89e-07	7.41e-08	-11.8011	8.6682	-2.9991
hsa-miR-5580-5p	1.89e-07	7.41e-08	-11.8011	8.6682	-2.9991
hsa-miR-5581-3p	1.89e-07	7.41e-08	-11.8011	8.6682	-2.9991
hsa-miR-5582-3p	1.89e-07	7.41e-08	-11.8011	8.6682	-2.9991
hsa-miR-5582-5p	1.89e-07	7.41e-08	-11.8011	8.6682	-2.9991
hsa-miR-5583-3p	1.89e-07	7.41e-08	-11.8011	8.6682	-2.9991
hsa-miR-5583-5p	1.89e-07	7.41e-08	-11.8011	8.6682	-2.9991
hsa-miR-5584-3p	1.89e-07	7.41e-08	-11.8011	8.6682	-2.9991
hsa-miR-5585-5p	1.89e-07	7.41e-08	-11.8011	8.6682	-2.9991
hsa-miR-5586-3p	1.89e-07	7.41e-08	-11.8011	8.6682	-2.9991
hsa-miR-5586-5p	1.89e-07	7.41e-08	-11.8011	8.6682	-2.9991
hsa-miR-5588-5p	1.89e-07	7.41e-08	-11.8011	8.6682	-2.9991
hsa-miR-5589-3p	1.89e-07	7.41e-08	-11.8011	8.6682	-2.9991
hsa-miR-559	1.89e-07	7.41e-08	-11.8011	8.6682	-2.9991
hsa-miR-5590-3p	1.89e-07	7.41e-08	-11.8011	8.6682	-2.9991
hsa-miR-5590-5p	1.89e-07	7.41e-08	-11.8011	8.6682	-2.9991
hsa-miR-5591-5p	1.89e-07	7.41e-08	-11.8011	8.6682	-2.9991
hsa-miR-561-3p	1.89e-07	7.41e-08	-11.8011	8.6682	-2.9991
hsa-miR-561-5p	1.89e-07	7.41e-08	-11.8011	8.6682	-2.9991
hsa-miR-562	1.89e-07	7.41e-08	-11.8011	8.6682	-2.9991
hsa-miR-568	1.89e-07	7.41e-08	-11.8011	8.6682	-2.9991
hsa-miR-5680	1.89e-07	7.41e-08	-11.8011	8.6682	-2.9991
hsa-miR-5682	1.89e-07	7.41e-08	-11.8011	8.6682	-2.9991
hsa-miR-5683	1.89e-07	7.41e-08	-11.8011	8.6682	-2.9991
hsa-miR-5689	1.89e-07	7.41e-08	-11.8011	8.6682	-2.9991
hsa-miR-569	1.89e-07	7.41e-08	-11.8011	8.6682	-2.9991
hsa-miR-5690	1.89e-07	7.41e-08	-11.8011	8.6682	-2.9991
hsa-miR-5692c	1.89e-07	7.41e-08	-11.8011	8.6682	-2.9991
hsa-miR-5693	1.89e-07	7.41e-08	-11.8011	8.6682	-2.9991
hsa-miR-5695	1.89e-07	7.41e-08	-11.8011	8.6682	-2.9991
hsa-miR-5697	1.89e-07	7.41e-08	-11.8011	8.6682	-2.9991
hsa-miR-5698	1.89e-07	7.41e-08	-11.8011	8.6682	-2.9991
hsa-miR-5702	1.89e-07	7.41e-08	-11.8011	8.6682	-2.9991
hsa-miR-5704	1.89e-07	7.41e-08	-11.8011	8.6682	-2.9991
hsa-miR-5705	1.89e-07	7.41e-08	-11.8011	8.6682	-2.9991
hsa-miR-5707	1.89e-07	7.41e-08	-11.8011	8.6682	-2.9991
hsa-miR-573	1.89e-07	7.41e-08	-11.8011	8.6682	-2.9991
hsa-miR-576-5p	1.89e-07	7.41e-08	-11.8011	8.6682	-2.9991
hsa-miR-577	1.89e-07	7.41e-08	-11.8011	8.6682	-2.9991
hsa-miR-578	1.89e-07	7.41e-08	-11.8011	8.6682	-2.9991
hsa-miR-579-3p	1.89e-07	7.41e-08	-11.8011	8.6682	-2.9991
hsa-miR-580-3p	1.89e-07	7.41e-08	-11.8011	8.6682	-2.9991
hsa-miR-580-5p	1.89e-07	7.41e-08	-11.8011	8.6682	-2.9991
hsa-miR-581	1.89e-07	7.41e-08	-11.8011	8.6682	-2.9991
hsa-miR-584-3p	1.89e-07	7.41e-08	-11.8011	8.6682	-2.9991
hsa-miR-586	1.89e-07	7.41e-08	-11.8011	8.6682	-2.9991
hsa-miR-587	1.89e-07	7.41e-08	-11.8011	8.6682	-2.9991
hsa-miR-590-3p	1.89e-07	7.41e-08	-11.8011	8.6682	-2.9991
hsa-miR-591	1.89e-07	7.41e-08	-11.8011	8.6682	-2.9991
hsa-miR-599	1.89e-07	7.41e-08	-11.8011	8.6682	-2.9991
hsa-miR-600	1.89e-07	7.41e-08	-11.8011	8.6682	-2.9991
hsa-miR-603	1.89e-07	7.41e-08	-11.8011	8.6682	-2.9991
hsa-miR-605-3p	1.89e-07	7.41e-08	-11.8011	8.6682	-2.9991
hsa-miR-606	1.89e-07	7.41e-08	-11.8011	8.6682	-2.9991
hsa-miR-607	1.89e-07	7.41e-08	-11.8011	8.6682	-2.9991
hsa-miR-6072	1.89e-07	7.41e-08	-11.8011	8.6682	-2.9991
hsa-miR-6078	1.89e-07	7.41e-08	-11.8011	8.6682	-2.9991
hsa-miR-6079	1.89e-07	7.41e-08	-11.8011	8.6682	-2.9991
hsa-miR-608	1.89e-07	7.41e-08	-11.8011	8.6682	-2.9991
hsa-miR-609	1.89e-07	7.41e-08	-11.8011	8.6682	-2.9991
hsa-miR-612	1.89e-07	7.41e-08	-11.8011	8.6682	-2.9991
hsa-miR-6128	1.89e-07	7.41e-08	-11.8011	8.6682	-2.9991
hsa-miR-613	1.89e-07	7.41e-08	-11.8011	8.6682	-2.9991
hsa-miR-616-5p	1.89e-07	7.41e-08	-11.8011	8.6682	-2.9991
hsa-miR-618	1.89e-07	7.41e-08	-11.8011	8.6682	-2.9991
hsa-miR-619-3p	1.89e-07	7.41e-08	-11.8011	8.6682	-2.9991
hsa-miR-621	1.89e-07	7.41e-08	-11.8011	8.6682	-2.9991
hsa-miR-624-5p	1.89e-07	7.41e-08	-11.8011	8.6682	-2.9991
hsa-miR-627-3p	1.89e-07	7.41e-08	-11.8011	8.6682	-2.9991
hsa-miR-633	1.89e-07	7.41e-08	-11.8011	8.6682	-2.9991
hsa-miR-641	1.89e-07	7.41e-08	-11.8011	8.6682	-2.9991
hsa-miR-642a-5p	1.89e-07	7.41e-08	-11.8011	8.6682	-2.9991
hsa-miR-642b-5p	1.89e-07	7.41e-08	-11.8011	8.6682	-2.9991
hsa-miR-644a	1.89e-07	7.41e-08	-11.8011	8.6682	-2.9991
hsa-miR-645	1.89e-07	7.41e-08	-11.8011	8.6682	-2.9991
hsa-miR-647	1.89e-07	7.41e-08	-11.8011	8.6682	-2.9991
hsa-miR-649	1.89e-07	7.41e-08	-11.8011	8.6682	-2.9991
hsa-miR-6499-3p	1.89e-07	7.41e-08	-11.8011	8.6682	-2.9991
hsa-miR-6499-5p	1.89e-07	7.41e-08	-11.8011	8.6682	-2.9991
hsa-miR-6501-3p	1.89e-07	7.41e-08	-11.8011	8.6682	-2.9991
hsa-miR-6502-3p	1.89e-07	7.41e-08	-11.8011	8.6682	-2.9991
hsa-miR-6502-5p	1.89e-07	7.41e-08	-11.8011	8.6682	-2.9991
hsa-miR-6504-3p	1.89e-07	7.41e-08	-11.8011	8.6682	-2.9991
hsa-miR-6505-3p	1.89e-07	7.41e-08	-11.8011	8.6682	-2.9991
hsa-miR-6506-3p	1.89e-07	7.41e-08	-11.8011	8.6682	-2.9991
hsa-miR-6506-5p	1.89e-07	7.41e-08	-11.8011	8.6682	-2.9991
hsa-miR-651-3p	1.89e-07	7.41e-08	-11.8011	8.6682	-2.9991
hsa-miR-651-5p	1.89e-07	7.41e-08	-11.8011	8.6682	-2.9991
hsa-miR-6510-3p	1.89e-07	7.41e-08	-11.8011	8.6682	-2.9991
hsa-miR-6513-3p	1.89e-07	7.41e-08	-11.8011	8.6682	-2.9991
hsa-miR-6514-3p	1.89e-07	7.41e-08	-11.8011	8.6682	-2.9991
hsa-miR-653-3p	1.89e-07	7.41e-08	-11.8011	8.6682	-2.9991
hsa-miR-653-5p	1.89e-07	7.41e-08	-11.8011	8.6682	-2.9991
hsa-miR-655-3p	1.89e-07	7.41e-08	-11.8011	8.6682	-2.9991
hsa-miR-655-5p	1.89e-07	7.41e-08	-11.8011	8.6682	-2.9991
hsa-miR-656-3p	1.89e-07	7.41e-08	-11.8011	8.6682	-2.9991
hsa-miR-656-5p	1.89e-07	7.41e-08	-11.8011	8.6682	-2.9991
hsa-miR-657	1.89e-07	7.41e-08	-11.8011	8.6682	-2.9991
hsa-miR-670-3p	1.89e-07	7.41e-08	-11.8011	8.6682	-2.9991
hsa-miR-6715a-3p	1.89e-07	7.41e-08	-11.8011	8.6682	-2.9991
hsa-miR-6715b-5p	1.89e-07	7.41e-08	-11.8011	8.6682	-2.9991
hsa-miR-6716-3p	1.89e-07	7.41e-08	-11.8011	8.6682	-2.9991
hsa-miR-6719-3p	1.89e-07	7.41e-08	-11.8011	8.6682	-2.9991
hsa-miR-6726-3p	1.89e-07	7.41e-08	-11.8011	8.6682	-2.9991
hsa-miR-6733-3p	1.89e-07	7.41e-08	-11.8011	8.6682	-2.9991
hsa-miR-6733-5p	1.89e-07	7.41e-08	-11.8011	8.6682	-2.9991
hsa-miR-6734-3p	1.89e-07	7.41e-08	-11.8011	8.6682	-2.9991
hsa-miR-6735-3p	1.89e-07	7.41e-08	-11.8011	8.6682	-2.9991
hsa-miR-6736-3p	1.89e-07	7.41e-08	-11.8011	8.6682	-2.9991
hsa-miR-6738-3p	1.89e-07	7.41e-08	-11.8011	8.6682	-2.9991
hsa-miR-6739-3p	1.89e-07	7.41e-08	-11.8011	8.6682	-2.9991
hsa-miR-6740-3p	1.89e-07	7.41e-08	-11.8011	8.6682	-2.9991
hsa-miR-6741-3p	1.89e-07	7.41e-08	-11.8011	8.6682	-2.9991
hsa-miR-6744-3p	1.89e-07	7.41e-08	-11.8011	8.6682	-2.9991
hsa-miR-6748-3p	1.89e-07	7.41e-08	-11.8011	8.6682	-2.9991
hsa-miR-6755-3p	1.89e-07	7.41e-08	-11.8011	8.6682	-2.9991
hsa-miR-6755-5p	1.89e-07	7.41e-08	-11.8011	8.6682	-2.9991
hsa-miR-6758-3p	1.89e-07	7.41e-08	-11.8011	8.6682	-2.9991
hsa-miR-676-3p	1.89e-07	7.41e-08	-11.8011	8.6682	-2.9991
hsa-miR-6762-3p	1.89e-07	7.41e-08	-11.8011	8.6682	-2.9991
hsa-miR-6764-3p	1.89e-07	7.41e-08	-11.8011	8.6682	-2.9991
hsa-miR-6764-5p	1.89e-07	7.41e-08	-11.8011	8.6682	-2.9991
hsa-miR-6768-3p	1.89e-07	7.41e-08	-11.8011	8.6682	-2.9991
hsa-miR-6769a-3p	1.89e-07	7.41e-08	-11.8011	8.6682	-2.9991
hsa-miR-6770-3p	1.89e-07	7.41e-08	-11.8011	8.6682	-2.9991
hsa-miR-6770-5p	1.89e-07	7.41e-08	-11.8011	8.6682	-2.9991
hsa-miR-6772-3p	1.89e-07	7.41e-08	-11.8011	8.6682	-2.9991
hsa-miR-6773-3p	1.89e-07	7.41e-08	-11.8011	8.6682	-2.9991
hsa-miR-6774-3p	1.89e-07	7.41e-08	-11.8011	8.6682	-2.9991
hsa-miR-6778-3p	1.89e-07	7.41e-08	-11.8011	8.6682	-2.9991
hsa-miR-6780a-3p	1.89e-07	7.41e-08	-11.8011	8.6682	-2.9991
hsa-miR-6780b-3p	1.89e-07	7.41e-08	-11.8011	8.6682	-2.9991
hsa-miR-6781-3p	1.89e-07	7.41e-08	-11.8011	8.6682	-2.9991
hsa-miR-6783-3p	1.89e-07	7.41e-08	-11.8011	8.6682	-2.9991
hsa-miR-6783-5p	1.89e-07	7.41e-08	-11.8011	8.6682	-2.9991
hsa-miR-6786-3p	1.89e-07	7.41e-08	-11.8011	8.6682	-2.9991
hsa-miR-6788-3p	1.89e-07	7.41e-08	-11.8011	8.6682	-2.9991
hsa-miR-6789-3p	1.89e-07	7.41e-08	-11.8011	8.6682	-2.9991
hsa-miR-6802-3p	1.89e-07	7.41e-08	-11.8011	8.6682	-2.9991
hsa-miR-6803-3p	1.89e-07	7.41e-08	-11.8011	8.6682	-2.9991
hsa-miR-6806-3p	1.89e-07	7.41e-08	-11.8011	8.6682	-2.9991
hsa-miR-6807-3p	1.89e-07	7.41e-08	-11.8011	8.6682	-2.9991
hsa-miR-6808-3p	1.89e-07	7.41e-08	-11.8011	8.6682	-2.9991
hsa-miR-6809-3p	1.89e-07	7.41e-08	-11.8011	8.6682	-2.9991
hsa-miR-6811-3p	1.89e-07	7.41e-08	-11.8011	8.6682	-2.9991
hsa-miR-6811-5p	1.89e-07	7.41e-08	-11.8011	8.6682	-2.9991
hsa-miR-6814-3p	1.89e-07	7.41e-08	-11.8011	8.6682	-2.9991
hsa-miR-6815-3p	1.89e-07	7.41e-08	-11.8011	8.6682	-2.9991
hsa-miR-6816-3p	1.89e-07	7.41e-08	-11.8011	8.6682	-2.9991
hsa-miR-6817-3p	1.89e-07	7.41e-08	-11.8011	8.6682	-2.9991
hsa-miR-6818-3p	1.89e-07	7.41e-08	-11.8011	8.6682	-2.9991
hsa-miR-6821-3p	1.89e-07	7.41e-08	-11.8011	8.6682	-2.9991
hsa-miR-6825-3p	1.89e-07	7.41e-08	-11.8011	8.6682	-2.9991
hsa-miR-6826-3p	1.89e-07	7.41e-08	-11.8011	8.6682	-2.9991
hsa-miR-6828-3p	1.89e-07	7.41e-08	-11.8011	8.6682	-2.9991
hsa-miR-6830-3p	1.89e-07	7.41e-08	-11.8011	8.6682	-2.9991
hsa-miR-6831-3p	1.89e-07	7.41e-08	-11.8011	8.6682	-2.9991
hsa-miR-6832-3p	1.89e-07	7.41e-08	-11.8011	8.6682	-2.9991
hsa-miR-6833-3p	1.89e-07	7.41e-08	-11.8011	8.6682	-2.9991
hsa-miR-6835-3p	1.89e-07	7.41e-08	-11.8011	8.6682	-2.9991
hsa-miR-6837-3p	1.89e-07	7.41e-08	-11.8011	8.6682	-2.9991
hsa-miR-6838-3p	1.89e-07	7.41e-08	-11.8011	8.6682	-2.9991
hsa-miR-6839-3p	1.89e-07	7.41e-08	-11.8011	8.6682	-2.9991
hsa-miR-6840-5p	1.89e-07	7.41e-08	-11.8011	8.6682	-2.9991
hsa-miR-6841-5p	1.89e-07	7.41e-08	-11.8011	8.6682	-2.9991
hsa-miR-6842-3p	1.89e-07	7.41e-08	-11.8011	8.6682	-2.9991
hsa-miR-6842-5p	1.89e-07	7.41e-08	-11.8011	8.6682	-2.9991
hsa-miR-6843-3p	1.89e-07	7.41e-08	-11.8011	8.6682	-2.9991
hsa-miR-6844	1.89e-07	7.41e-08	-11.8011	8.6682	-2.9991
hsa-miR-6846-3p	1.89e-07	7.41e-08	-11.8011	8.6682	-2.9991
hsa-miR-6847-3p	1.89e-07	7.41e-08	-11.8011	8.6682	-2.9991
hsa-miR-6852-3p	1.89e-07	7.41e-08	-11.8011	8.6682	-2.9991
hsa-miR-6853-3p	1.89e-07	7.41e-08	-11.8011	8.6682	-2.9991
hsa-miR-6854-5p	1.89e-07	7.41e-08	-11.8011	8.6682	-2.9991
hsa-miR-6856-3p	1.89e-07	7.41e-08	-11.8011	8.6682	-2.9991
hsa-miR-6859-3p	1.89e-07	7.41e-08	-11.8011	8.6682	-2.9991
hsa-miR-6864-3p	1.89e-07	7.41e-08	-11.8011	8.6682	-2.9991
hsa-miR-6866-3p	1.89e-07	7.41e-08	-11.8011	8.6682	-2.9991
hsa-miR-6866-5p	1.89e-07	7.41e-08	-11.8011	8.6682	-2.9991
hsa-miR-6867-3p	1.89e-07	7.41e-08	-11.8011	8.6682	-2.9991
hsa-miR-6871-3p	1.89e-07	7.41e-08	-11.8011	8.6682	-2.9991
hsa-miR-6873-3p	1.89e-07	7.41e-08	-11.8011	8.6682	-2.9991
hsa-miR-6874-3p	1.89e-07	7.41e-08	-11.8011	8.6682	-2.9991
hsa-miR-6876-3p	1.89e-07	7.41e-08	-11.8011	8.6682	-2.9991
hsa-miR-6878-3p	1.89e-07	7.41e-08	-11.8011	8.6682	-2.9991
hsa-miR-6879-3p	1.89e-07	7.41e-08	-11.8011	8.6682	-2.9991
hsa-miR-6881-3p	1.89e-07	7.41e-08	-11.8011	8.6682	-2.9991
hsa-miR-6882-3p	1.89e-07	7.41e-08	-11.8011	8.6682	-2.9991
hsa-miR-6883-3p	1.89e-07	7.41e-08	-11.8011	8.6682	-2.9991
hsa-miR-6887-3p	1.89e-07	7.41e-08	-11.8011	8.6682	-2.9991
hsa-miR-6888-3p	1.89e-07	7.41e-08	-11.8011	8.6682	-2.9991
hsa-miR-6888-5p	1.89e-07	7.41e-08	-11.8011	8.6682	-2.9991
hsa-miR-6894-3p	1.89e-07	7.41e-08	-11.8011	8.6682	-2.9991
hsa-miR-6895-3p	1.89e-07	7.41e-08	-11.8011	8.6682	-2.9991
hsa-miR-7-2-3p	1.89e-07	7.41e-08	-11.8011	8.6682	-2.9991
hsa-miR-708-3p	1.89e-07	7.41e-08	-11.8011	8.6682	-2.9991
hsa-miR-7107-3p	1.89e-07	7.41e-08	-11.8011	8.6682	-2.9991
hsa-miR-7110-3p	1.89e-07	7.41e-08	-11.8011	8.6682	-2.9991
hsa-miR-7112-3p	1.89e-07	7.41e-08	-11.8011	8.6682	-2.9991
hsa-miR-7113-3p	1.89e-07	7.41e-08	-11.8011	8.6682	-2.9991
hsa-miR-7151-5p	1.89e-07	7.41e-08	-11.8011	8.6682	-2.9991
hsa-miR-7154-5p	1.89e-07	7.41e-08	-11.8011	8.6682	-2.9991
hsa-miR-7156-5p	1.89e-07	7.41e-08	-11.8011	8.6682	-2.9991
hsa-miR-7158-5p	1.89e-07	7.41e-08	-11.8011	8.6682	-2.9991
hsa-miR-7160-3p	1.89e-07	7.41e-08	-11.8011	8.6682	-2.9991
hsa-miR-7161-3p	1.89e-07	7.41e-08	-11.8011	8.6682	-2.9991
hsa-miR-7162-5p	1.89e-07	7.41e-08	-11.8011	8.6682	-2.9991
hsa-miR-759	1.89e-07	7.41e-08	-11.8011	8.6682	-2.9991
hsa-miR-7702	1.89e-07	7.41e-08	-11.8011	8.6682	-2.9991
hsa-miR-7703	1.89e-07	7.41e-08	-11.8011	8.6682	-2.9991
hsa-miR-7705	1.89e-07	7.41e-08	-11.8011	8.6682	-2.9991
hsa-miR-7706	1.89e-07	7.41e-08	-11.8011	8.6682	-2.9991
hsa-miR-7843-3p	1.89e-07	7.41e-08	-11.8011	8.6682	-2.9991
hsa-miR-7843-5p	1.89e-07	7.41e-08	-11.8011	8.6682	-2.9991
hsa-miR-7849-3p	1.89e-07	7.41e-08	-11.8011	8.6682	-2.9991
hsa-miR-7852-3p	1.89e-07	7.41e-08	-11.8011	8.6682	-2.9991
hsa-miR-7973	1.89e-07	7.41e-08	-11.8011	8.6682	-2.9991
hsa-miR-7976	1.89e-07	7.41e-08	-11.8011	8.6682	-2.9991
hsa-miR-7978	1.89e-07	7.41e-08	-11.8011	8.6682	-2.9991
hsa-miR-8056	1.89e-07	7.41e-08	-11.8011	8.6682	-2.9991
hsa-miR-8058	1.89e-07	7.41e-08	-11.8011	8.6682	-2.9991
hsa-miR-8061	1.89e-07	7.41e-08	-11.8011	8.6682	-2.9991
hsa-miR-8062	1.89e-07	7.41e-08	-11.8011	8.6682	-2.9991
hsa-miR-8065	1.89e-07	7.41e-08	-11.8011	8.6682	-2.9991
hsa-miR-8066	1.89e-07	7.41e-08	-11.8011	8.6682	-2.9991
hsa-miR-8067	1.89e-07	7.41e-08	-11.8011	8.6682	-2.9991
hsa-miR-8068	1.89e-07	7.41e-08	-11.8011	8.6682	-2.9991
hsa-miR-8076	1.89e-07	7.41e-08	-11.8011	8.6682	-2.9991
hsa-miR-8081	1.89e-07	7.41e-08	-11.8011	8.6682	-2.9991
hsa-miR-8084	1.89e-07	7.41e-08	-11.8011	8.6682	-2.9991
hsa-miR-8086	1.89e-07	7.41e-08	-11.8011	8.6682	-2.9991
hsa-miR-873-3p	1.89e-07	7.41e-08	-11.8011	8.6682	-2.9991
hsa-miR-875-3p	1.89e-07	7.41e-08	-11.8011	8.6682	-2.9991
hsa-miR-876-3p	1.89e-07	7.41e-08	-11.8011	8.6682	-2.9991
hsa-miR-888-5p	1.89e-07	7.41e-08	-11.8011	8.6682	-2.9991
hsa-miR-889-3p	1.89e-07	7.41e-08	-11.8011	8.6682	-2.9991
hsa-miR-889-5p	1.89e-07	7.41e-08	-11.8011	8.6682	-2.9991
hsa-miR-891a-3p	1.89e-07	7.41e-08	-11.8011	8.6682	-2.9991
hsa-miR-891b	1.89e-07	7.41e-08	-11.8011	8.6682	-2.9991
hsa-miR-892a	1.89e-07	7.41e-08	-11.8011	8.6682	-2.9991
hsa-miR-922	1.89e-07	7.41e-08	-11.8011	8.6682	-2.9991
hsa-miR-924	1.89e-07	7.41e-08	-11.8011	8.6682	-2.9991
hsa-miR-941	1.89e-07	7.41e-08	-11.8011	8.6682	-2.9991
hsa-miR-942-5p	1.89e-07	7.41e-08	-11.8011	8.6682	-2.9991
hsa-miR-943	1.89e-07	7.41e-08	-11.8011	8.6682	-2.9991
hsa-miR-95-3p	1.89e-07	7.41e-08	-11.8011	8.6682	-2.9991
hsa-miR-95-5p	1.89e-07	7.41e-08	-11.8011	8.6682	-2.9991
hsa-miR-99a-3p	1.89e-07	7.41e-08	-11.8011	8.6682	-2.9991
hsa-miR-25-3p	0.00586	0.00348	-3.64627	-2.3114	-2.99238
hsa-miR-361-3p	0.0494	0.0357	-2.37267	-4.6098	-2.98175
hsa-miR-6872-3p	0.00277	0.00154	-4.10373	-1.4817	-2.96443
hsa-miR-378a-5p	0.000489	0.000248	-5.17876	0.3869	-2.91283
hsa-miR-29c-3p	0.00903	0.00552	-3.39203	-2.7767	-2.8925
hsa-miR-203a-3p	0.00732	0.00441	-3.51546	-2.5506	-2.88957
hsa-miR-421	1.18e-06	4.94e-07	-9.88662	6.7687	-2.86528
hsa-miR-4292	0.0143	0.00916	-3.11601	-3.2819	-2.85388
hsa-miR-29a-3p	0.00829	0.00504	-3.44237	-2.6845	-2.80031
hsa-miR-129-2-3p	0.000408	0.000206	-5.29538	0.5809	-2.79212
hsa-miR-107	0.01	0.00619	-3.32905	-2.8921	-2.78574
hsa-miR-181c-5p	0.0134	0.00851	-3.15596	-3.2089	-2.77881
hsa-miR-200a-5p	0.000898	0.000468	-4.79391	-0.266	-2.72677
hsa-miR-17-5p	0.0136	0.00865	-3.14694	-3.2254	-2.69994
hsa-miR-301a-3p	0.0283	0.0192	-2.71183	-4.0136	-2.69383
hsa-miR-4767	1.26e-05	5.69e-06	-7.79349	4.2776	-2.65447
hsa-miR-6832-5p	0.0337	0.0233	-2.60647	-4.2012	-2.64361
hsa-miR-29b-3p	0.0231	0.0154	-2.83162	-3.7985	-2.57739
hsa-miR-596	0.0025	0.00137	-4.16705	-1.3681	-2.52454
hsa-let-7i-3p	0.00528	0.00309	-3.71249	-2.1905	-2.52454
hsa-miR-626	0.00528	0.00309	-3.71249	-2.1905	-2.52454
hsa-miR-802	0.00528	0.00309	-3.71249	-2.1905	-2.52454
hsa-miR-767-3p	0.00233	0.00128	-4.20874	-1.2935	-2.51484
hsa-miR-593-5p	0.00239	0.00131	-4.19292	-1.3218	-2.51303
hsa-miR-216b-5p	0.00228	0.00125	-4.22283	-1.2683	-2.49899
hsa-miR-935	0.00316	0.00176	-4.02679	-1.6202	-2.49334
hsa-miR-888-3p	0.00344	0.00193	-3.97557	-1.7127	-2.48703
hsa-miR-380-5p	0.000261	0.000129	-5.58986	1.0621	-2.48074
hsa-miR-4774-5p	0.00871	0.00531	-3.41318	-2.7379	-2.48012
hsa-miR-34a-3p	0.00936	0.00575	-3.37018	-2.8167	-2.47325
hsa-miR-589-5p	0.000312	0.000155	-5.47285	0.8723	-2.47277
hsa-miR-1306-5p	0.00942	0.0058	-3.36481	-2.8266	-2.47239
hsa-miR-660-3p	0.0102	0.00637	-3.31358	-2.9204	-2.46402
hsa-miR-4802-3p	0.004	0.00227	-3.88271	-1.8808	-2.45807
hsa-miR-194-3p	0.00556	0.00327	-3.68074	-2.2484	-2.44704
hsa-miR-218-2-3p	0.00612	0.00365	-3.61993	-2.3595	-2.43962
hsa-miR-30a-3p	0.0195	0.0128	-2.93228	-3.6164	-2.4344
hsa-miR-1284	0.00537	0.00314	-3.70206	-2.2095	-2.43411
hsa-miR-4803	0.00562	0.0033	-3.67474	-2.2594	-2.43034
hsa-miR-34b-3p	0.0149	0.0096	-3.09003	-3.3293	-2.4251
hsa-miR-3663-3p	0.000108	5.12e-05	-6.1963	2.0143	-2.42324
hsa-miR-141-5p	0.0158	0.0102	-3.05766	-3.3884	-2.41912
hsa-miR-132-3p	0.00187	0.00101	-4.34226	-1.0557	-2.41566
hsa-miR-4692	0.00941	0.00579	-3.36597	-2.8245	-2.41537
hsa-miR-106b-5p	0.0231	0.0154	-2.83237	-3.7971	-2.41277
hsa-miR-6816-5p	0.00967	0.00598	-3.34851	-2.8564	-2.41257
hsa-miR-329-3p	0.018	0.0118	-2.97917	-3.5313	-2.40422
hsa-miR-668-5p	0.00124	0.00066	-4.59119	-0.6175	-2.40286
hsa-miR-376b-3p	0.019	0.0125	-2.94753	-3.5887	-2.39804
hsa-miR-4717-5p	0.0116	0.00727	-3.24187	-3.0518	-2.39499
hsa-miR-224-3p	0.0107	0.00666	-3.28983	-2.9639	-2.38904
hsa-miR-485-5p	0.00161	0.000869	-4.43009	-0.9003	-2.3878
hsa-miR-6787-3p	0.011	0.00687	-3.27239	-2.9959	-2.38616
hsa-miR-148b-3p	0.0162	0.0105	-3.04354	-3.4141	-2.38443
hsa-miR-643	0.0123	0.00776	-3.20632	-3.1168	-2.37504
hsa-miR-4780	0.0126	0.00792	-3.19498	-3.1376	-2.3731
hsa-miR-2355-5p	0.0127	0.00802	-3.18849	-3.1494	-2.37199
hsa-miR-7160-5p	0.013	0.00828	-3.1711	-3.1812	-2.36898
hsa-miR-4254	0.0134	0.0085	-3.15665	-3.2077	-2.36647
hsa-miR-7106-3p	0.0118	0.0074	-3.23186	-3.0701	-2.3628
hsa-miR-147a	0.0119	0.00749	-3.22558	-3.0816	-2.36174
hsa-miR-8083	0.012	0.00754	-3.22196	-3.0882	-2.36113
hsa-miR-330-5p	0.00256	0.00141	-4.15087	-1.3971	-2.35957
hsa-miR-4686	0.0123	0.00774	-3.20723	-3.1152	-2.35864
hsa-miR-203b-3p	0.0145	0.00933	-3.10586	-3.3004	-2.35749
hsa-miR-5189-3p	0.0125	0.00786	-3.19936	-3.1296	-2.35731
hsa-miR-4766-3p	0.0128	0.00808	-3.18382	-3.158	-2.35465
hsa-miR-4766-5p	0.013	0.00826	-3.17189	-3.1798	-2.3526
hsa-miR-1199-3p	0.014	0.00894	-3.12874	-3.2587	-2.3451
hsa-miR-4724-5p	0.0142	0.00909	-3.11968	-3.2752	-2.3435
hsa-miR-376a-5p	0.0296	0.0202	-2.68577	-4.0602	-2.34298
hsa-miR-1285-5p	0.00336	0.00188	-3.98905	-1.6883	-2.34183
hsa-miR-451b	0.0169	0.011	-3.01845	-3.4598	-2.34153
hsa-miR-4492	0.00338	0.00189	-3.98537	-1.695	-2.34141
hsa-miR-4650-3p	0.00349	0.00196	-3.96664	-1.7288	-2.33928
hsa-miR-6761-5p	0.00352	0.00198	-3.96104	-1.7389	-2.33864
hsa-miR-219b-5p	0.0174	0.0113	-3.0009	-3.4917	-2.33825
hsa-miR-6874-5p	0.00383	0.00216	-3.91044	-1.8305	-2.3328
hsa-miR-548ad-3p	0.00383	0.00216	-3.91041	-1.8306	-2.3328
hsa-miR-5587-3p	0.00389	0.0022	-3.90077	-1.8481	-2.33167
hsa-miR-4708-3p	0.00391	0.00222	-3.89701	-1.8549	-2.33123
hsa-miR-4479	0.00396	0.00225	-3.88961	-1.8683	-2.33036
hsa-miR-548ao-3p	0.00398	0.00226	-3.88618	-1.8745	-2.32996
hsa-miR-4781-5p	0.004	0.00228	-3.88222	-1.8817	-2.32949
hsa-miR-3649	0.0042	0.0024	-3.85194	-1.9367	-2.3259
hsa-miR-3169	0.00421	0.00241	-3.85116	-1.9381	-2.32581
hsa-miR-541-5p	0.0043	0.00247	-3.83584	-1.9659	-2.32397
hsa-miR-4456	0.00431	0.00248	-3.83503	-1.9674	-2.32387
hsa-miR-200b-5p	0.000473	0.000239	-5.20117	0.4243	-2.3213
hsa-miR-6869-3p	0.00447	0.00257	-3.81317	-2.0071	-2.32124
hsa-miR-1273h-3p	0.00457	0.00264	-3.79922	-2.0325	-2.31954
hsa-miR-6729-3p	0.00458	0.00265	-3.79774	-2.0352	-2.31936
hsa-miR-6829-3p	0.00473	0.00274	-3.77768	-2.0717	-2.31691
hsa-miR-4301	0.0211	0.014	-2.88467	-3.7027	-2.31577
hsa-miR-4690-3p	0.00484	0.00282	-3.76337	-2.0978	-2.31514
hsa-miR-151b	0.00557	0.00327	-3.67966	-2.2504	-2.31491
hsa-miR-6864-5p	0.0185	0.0121	-2.96329	-3.5601	-2.31485
hsa-miR-6071	0.00493	0.00287	-3.75324	-2.1162	-2.31389
hsa-miR-3612	0.00498	0.0029	-3.74709	-2.1274	-2.31312
hsa-miR-1180-5p	0.00498	0.0029	-3.74684	-2.1279	-2.31309
hsa-miR-30e-5p	0.00506	0.00295	-3.73771	-2.1445	-2.31106
hsa-miR-875-5p	0.00514	0.003	-3.72852	-2.1613	-2.3108
hsa-miR-450b-3p	0.0224	0.0149	-2.85088	-3.7637	-2.30899
hsa-miR-1273d	0.00533	0.00312	-3.70685	-2.2008	-2.30807
hsa-miR-103a-3p	0.0251	0.0168	-2.78647	-3.8798	-2.30626
hsa-miR-196a-5p	0.00128	0.000678	-4.57516	-0.6455	-2.30027
hsa-miR-6505-5p	0.00599	0.00356	-3.6337	-2.3343	-2.29867
hsa-miR-30e-3p	0.0214	0.0142	-2.87631	-3.7178	-2.29822
hsa-miR-514a-5p	0.00681	0.00409	-3.55681	-2.4749	-2.28847
hsa-miR-764	0.00795	0.00481	-3.4678	-2.6379	-2.27624
hsa-miR-3938	6.18e-08	3.24e-09	-15.6587	11.6918	-2.27371
hsa-miR-7855-5p	0.00843	0.00513	-3.43186	-2.7037	-2.27117
hsa-miR-222-5p	0.0318	0.0218	-2.64251	-4.1372	-2.26446
hsa-miR-186-3p	0.00936	0.00575	-3.36934	-2.8183	-2.26214
hsa-miR-6804-3p	0.0364	0.0255	-2.55841	-4.2861	-2.24504
hsa-miR-3194-3p	0.0123	0.00777	-3.20519	-3.1189	-2.2372
hsa-miR-6827-3p	0.0394	0.0278	-2.51089	-4.3696	-2.23366
hsa-miR-4747-5p	0.0133	0.00845	-3.15947	-3.2025	-2.22991
hsa-miR-1250-3p	0.0405	0.0287	-2.49344	-4.4002	-2.22941
hsa-miR-302d-5p	0.0135	0.00858	-3.15167	-3.2168	-2.22865
hsa-miR-381-5p	0.0145	0.00932	-3.10617	-3.2999	-2.22121
hsa-miR-130a-3p	0.0277	0.0188	-2.72485	-3.9904	-2.21823
hsa-miR-5681a	0.0171	0.0111	-3.01008	-3.475	-2.20494
hsa-miR-532-5p	0.00122	0.00065	-4.59971	-0.6026	-2.20149
hsa-miR-1264	0.0488	0.0352	-2.38055	-4.5963	-2.20085
hsa-miR-425-5p	0.0176	0.0115	-2.99429	-3.5038	-2.1998
hsa-miR-3691-5p	0.0189	0.0124	-2.94916	-3.5858	-2.19422
hsa-miR-620	0.0189	0.0125	-2.94866	-3.5867	-2.19413
hsa-miR-302a-3p	0.0191	0.0125	-2.94477	-3.5938	-2.19343
hsa-miR-4754	0.0147	0.00947	-3.09786	-3.315	-2.18974
hsa-miR-6802-5p	0.000798	0.000414	-4.86703	-0.1404	-2.18385
hsa-miR-323a-5p	0.021	0.0139	-2.88896	-3.6949	-2.1833
hsa-miR-5092	0.021	0.0139	-2.88872	-3.6953	-2.18325
hsa-miR-5196-5p	0.01	0.00621	-3.32785	-2.8943	-2.18194
hsa-miR-3909	0.0219	0.0145	-2.86418	-3.7397	-2.1787
hsa-miR-27a-3p	0.0484	0.0349	-2.38587	-4.5871	-2.17577
hsa-miR-4752	0.0227	0.0151	-2.84276	-3.7784	-2.17469
hsa-miR-4689	0.00398	0.00226	-3.8853	-1.8761	-2.17259
hsa-miR-4300	0.0245	0.0164	-2.79978	-3.8559	-2.16649
hsa-miR-4266	0.0247	0.0165	-2.79507	-3.8643	-2.16558
hsa-miR-6878-5p	0.0251	0.0168	-2.7852	-3.8821	-2.16367
hsa-miR-1251-5p	0.0251	0.0168	-2.78489	-3.8826	-2.16361
hsa-miR-7159-3p	0.0253	0.017	-2.77961	-3.8921	-2.16258
hsa-miR-3187-3p	0.0266	0.018	-2.74943	-3.9463	-2.15665
hsa-miR-6849-3p	0.0267	0.018	-2.7468	-3.951	-2.15613
hsa-miR-4723-3p	0.0268	0.0182	-2.74359	-3.9568	-2.15549
hsa-miR-3944-3p	0.027	0.0183	-2.74028	-3.9627	-2.15483
hsa-miR-195-3p	0.0393	0.0277	-2.51216	-4.3674	-2.1542
hsa-miR-3181	0.0284	0.0193	-2.71021	-4.0165	-2.1488
hsa-miR-4645-3p	0.0292	0.0199	-2.69448	-4.0446	-2.1456
hsa-miR-4525	0.0296	0.0201	-2.68707	-4.0579	-2.14409
hsa-miR-1273g-5p	0.0299	0.0204	-2.68036	-4.0698	-2.14271
hsa-miR-3942-5p	0.0303	0.0207	-2.67194	-4.0849	-2.14098
hsa-miR-628-5p	0.0304	0.0208	-2.66831	-4.0913	-2.14023
hsa-miR-4317	0.000342	0.000171	-5.41046	0.7703	-2.13833
hsa-miR-3928-3p	0.0342	0.0238	-2.59556	-4.2205	-2.12487
hsa-miR-6720-5p	0.0346	0.0241	-2.58885	-4.2324	-2.12342
hsa-miR-4764-5p	0.0348	0.0243	-2.58448	-4.2401	-2.12248
hsa-miR-4683	0.0353	0.0246	-2.57741	-4.2526	-2.12094
hsa-miR-3689a-5p	0.0356	0.0249	-2.57061	-4.2646	-2.11946
hsa-miR-4439	0.0397	0.028	-2.50584	-4.3785	-2.10505
hsa-miR-4265	0.0408	0.0289	-2.48889	-4.4081	-2.10119
hsa-miR-4463	0.00755	0.00456	-3.49652	-2.5853	-2.10082
hsa-miR-5197-3p	0.0419	0.0298	-2.47171	-4.4381	-2.09725
hsa-miR-4432	0.0428	0.0305	-2.45961	-4.4592	-2.09444
hsa-miR-23a-3p	0.0338	0.0234	-2.60395	-4.2056	-2.08982
hsa-miR-4696	0.047	0.0338	-2.40284	-4.5578	-2.08101
hsa-miR-135b-3p	0.0487	0.0351	-2.382	-4.5938	-2.07597
hsa-miR-4661-5p	0.0494	0.0357	-2.37324	-4.6089	-2.07383
hsa-miR-101-3p	0.0399	0.0282	-2.50218	-4.3849	-2.06292
hsa-miR-6088	0.000517	0.000264	-5.14154	0.3246	-2.06012
hsa-miR-147b	0.0401	0.0284	-2.4996	-4.3894	-2.04998
hsa-miR-96-3p	0.0401	0.0284	-2.4996	-4.3894	-2.04998
hsa-miR-26a-1-3p	0.0389	0.0274	-2.5181	-4.357	-2.04285
hsa-miR-208a-5p	1.04e-06	4.32e-07	-10.0141	6.9054	-2.03024
hsa-miR-324-5p	0.0369	0.0259	-2.54931	-4.3021	-2.01288
hsa-miR-4516	0.00152	0.000815	-4.46765	-0.8341	-1.9867
hsa-miR-323b-5p	0.0341	0.0237	-2.59748	-4.2171	-1.9796
hsa-miR-331-3p	0.000618	0.000318	-5.02753	0.1327	-1.97854
hsa-miR-105-3p	0.0354	0.0247	-2.57437	-4.2579	-1.97202
hsa-miR-342-3p	0.0315	0.0216	-2.64816	-4.1272	-1.95106
hsa-miR-920	0.0155	0.01	-3.06703	-3.3713	-1.94987
hsa-miR-6779-3p	0.046	0.033	-2.41535	-4.5361	-1.92612
hsa-miR-125a-5p	0.00633	0.00378	-3.59998	-2.396	-1.86181
hsa-miR-361-5p	0.0251	0.0169	-2.78364	-3.8849	-1.84894
hsa-miR-7974	1.32e-05	5.99e-06	-7.75369	4.2253	-1.83586
hsa-miR-217	0.0346	0.0241	-2.58957	-4.2311	-1.83549
hsa-miR-639	0.0413	0.0294	-2.48009	-4.4235	-1.83395
hsa-miR-4281	0.00108	0.000573	-4.67437	-0.4726	-1.81165
hsa-miR-4634	0.000327	0.000163	-5.44146	0.8211	-1.80861
hsa-miR-6850-5p	8.26e-05	3.91e-05	-6.3811	2.2941	-1.80013
hsa-miR-181b-5p	0.000209	0.000102	-5.73928	1.3016	-1.77126
hsa-miR-3195	2.96e-07	1.18e-07	-11.3039	8.2049	-1.7217
hsa-miR-1908-3p	0.000182	8.84e-05	-5.83354	1.451	-1.72125
hsa-miR-652-3p	0.0422	0.03	-2.46849	-4.4438	-1.69958
hsa-miR-4455	0.0311	0.0213	-2.65543	-4.1143	-1.6863
hsa-miR-6515-3p	0.000259	0.000128	-5.59586	1.0718	-1.66409
hsa-miR-6768-5p	9.59e-07	3.95e-07	-10.0991	6.9958	-1.64858
hsa-miR-373-5p	3.61e-06	1.57e-06	-8.84906	5.5948	-1.62887
hsa-miR-4739	0.00337	0.00189	-3.9878	-1.6906	-1.60867
hsa-miR-1238-3p	1.99e-06	8.46e-07	-9.3934	6.2246	-1.60559
hsa-miR-566	1.26e-05	5.71e-06	-7.79059	4.2738	-1.59169
hsa-miR-6800-3p	3.42e-05	1.58e-05	-7.02164	3.2269	-1.58903
hsa-miR-191-3p	3.14e-06	1.36e-06	-8.97321	5.7412	-1.56169
hsa-miR-4787-3p	0.000192	9.37e-05	-5.79613	1.3919	-1.55698
hsa-miR-6795-3p	1.81e-05	8.24e-06	-7.50777	3.8977	-1.52085
hsa-miR-6069	3.3e-05	1.52e-05	-7.04796	3.264	-1.51153
hsa-miR-7854-3p	0.00256	0.00141	4.15197	-1.3951	1.50215
hsa-miR-6774-5p	0.00585	0.00347	3.64832	-2.3076	1.50686
hsa-miR-575	0.00251	0.00138	4.1653	-1.3712	1.52618
hsa-miR-584-5p	0.0194	0.0128	2.93305	-3.615	1.53008
hsa-miR-4758-5p	0.043	0.0307	2.45636	-4.4649	1.56462
hsa-miR-6125	0.00555	0.00326	3.68241	-2.2454	1.58263
hsa-miR-296-3p	0.00996	0.00616	3.33204	-2.8866	1.5931
hsa-miR-6870-5p	4.42e-05	2.06e-05	6.83126	2.9556	1.59936
hsa-miR-4647	0.000223	0.000109	5.69826	1.2361	1.61172
hsa-miR-3667-5p	0.0127	0.00804	3.18711	-3.152	1.62791
hsa-miR-601	0.00456	0.00263	3.80164	-2.0281	1.62928
hsa-miR-610	0.014	0.00896	3.12789	-3.2602	1.63478
hsa-miR-3158-5p	0.00326	0.00182	4.00753	-1.6549	1.63575
hsa-miR-6867-5p	0.00421	0.00241	3.84914	-1.9418	1.69001
hsa-miR-624-3p	0.00611	0.00364	3.6212	-2.3572	1.69488
hsa-miR-1205	0.000693	0.000358	4.95569	0.0109	1.69504
hsa-miR-5006-5p	5.57e-05	2.61e-05	6.66215	2.7104	1.70271
hsa-miR-1539	0.0396	0.0279	2.50775	-4.3751	1.70505
hsa-miR-654-5p	0.000909	0.000475	4.78547	-0.2805	1.7057
hsa-miR-4459	0.00742	0.00447	3.5075	-2.5652	1.71175
hsa-miR-1227-3p	0.00302	0.00168	4.05296	-1.573	1.71825
hsa-miR-8060	0.00229	0.00125	4.22025	-1.2729	1.72737
hsa-miR-4538	0.0409	0.029	2.48718	-4.4111	1.73805
hsa-miR-6858-5p	5.47e-06	2.4e-06	8.48916	5.1604	1.74576
hsa-miR-6743-5p	0.0225	0.015	2.84743	-3.77	1.76639
hsa-miR-508-5p	0.000274	0.000136	5.55807	1.0107	1.77921
hsa-miR-3194-5p	0.00161	0.000866	4.43255	-0.896	1.78413
hsa-miR-6839-5p	0.000528	0.000269	5.12835	0.3025	1.78861
hsa-miR-7641	0.000148	7.14e-05	5.97417	1.6716	1.79512
hsa-miR-4755-3p	0.00798	0.00483	3.46542	-2.6422	1.79731
hsa-miR-7704	0.0033	0.00184	4.00047	-1.6677	1.79787
hsa-miR-4649-3p	0.0329	0.0227	2.62094	-4.1755	1.823
hsa-miR-6875-3p	1.57e-05	7.17e-06	7.61433	4.0406	1.82371
hsa-miR-139-3p	0.00633	0.00379	3.59946	-2.3969	1.84712
hsa-miR-6771-5p	5.8e-06	2.57e-06	8.43425	5.0928	1.84785
hsa-miR-4646-5p	0.000173	8.37e-05	5.86993	1.5084	1.86204
hsa-miR-5703	0.00298	0.00165	4.06187	-1.557	1.87369
hsa-miR-1266-3p	0.000304	0.000151	5.48923	0.899	1.88051
hsa-miR-636	0.0138	0.00884	3.13527	-3.2467	1.88491
hsa-miR-135a-3p	0.0067	0.00402	3.56637	-2.4574	1.88947
hsa-miR-4314	0.0205	0.0135	2.90329	-3.6689	1.90588
hsa-miR-6730-5p	0.0437	0.0313	2.44509	-4.4845	1.91219
hsa-miR-1299	0.00037	0.000186	5.35727	0.683	1.91233
hsa-miR-3945	0.00639	0.00382	3.59381	-2.4073	1.94983
hsa-let-7g-3p	1.15e-06	4.8e-07	9.91421	6.7985	1.95999
hsa-miR-6760-3p	0.0107	0.00667	3.28835	-2.9666	1.96165
hsa-miR-6833-5p	0.00108	0.000569	4.67849	-0.4655	1.96175
hsa-miR-138-5p	0.0309	0.0212	2.65966	-4.1067	1.96208
hsa-miR-483-3p	0.0175	0.0114	2.99708	-3.4987	1.99851
hsa-miR-3621	0.0185	0.0121	2.96514	-3.5568	2.01403
hsa-miR-663a	0.0175	0.0114	2.99916	-3.4949	2.01759
hsa-miR-501-5p	0.0427	0.0305	2.46006	-4.4585	2.01985
hsa-miR-3917	0.0134	0.00851	3.15557	-3.2096	2.03468
hsa-miR-5008-5p	0.00555	0.00326	3.68247	-2.2453	2.03585
hsa-miR-6793-3p	3.77e-06	1.65e-06	8.80953	5.5478	2.03916
hsa-miR-6511b-3p	5.89e-07	2.4e-07	10.5836	7.4975	2.04825
hsa-miR-3170	3.04e-06	1.32e-06	9.00256	5.7756	2.05731
hsa-miR-6742-5p	0.0454	0.0325	2.42376	-4.5216	2.07077
hsa-miR-370-3p	0.00178	0.000961	4.37205	-1.0029	2.11086
hsa-miR-10a-3p	0.00586	0.00348	3.64628	-2.3114	2.13229
hsa-miR-5008-3p	1.01e-06	4.18e-07	10.0446	6.9379	2.13986
hsa-miR-196b-3p	0.0469	0.0337	2.40466	-4.5546	2.15059
hsa-miR-6798-3p	0.00842	0.00513	3.4324	-2.7027	2.17102
hsa-miR-7155-5p	1.57e-05	7.14e-06	7.61764	4.045	2.17489
hsa-miR-3200-5p	0.000552	0.000282	5.1003	0.2554	2.18953
hsa-miR-1909-3p	3.57e-05	1.65e-05	6.98975	3.1818	2.19055
hsa-miR-6810-3p	5.73e-07	2.33e-07	10.6118	7.526	2.19596
hsa-miR-2392	0.00121	0.00064	4.60869	-0.5869	2.19919
hsa-miR-3065-5p	0.0379	0.0266	2.53423	-4.3286	2.20145
hsa-miR-4672	0.000317	0.000158	5.4613	0.8535	2.20688
hsa-miR-6732-3p	0.000148	7.1e-05	5.97851	1.6784	2.20758
hsa-miR-4738-3p	0.000234	0.000115	5.6634	1.1803	2.23814
hsa-miR-6785-3p	0.00214	0.00117	4.26009	-1.2018	2.2452
hsa-miR-6819-5p	4.4e-05	2.05e-05	6.83494	2.9609	2.24743
hsa-miR-1229-3p	0.000481	0.000244	5.19011	0.4059	2.25024
hsa-miR-520c-3p	0.0443	0.0317	2.43742	-4.4979	2.25297
hsa-miR-8070	0.0449	0.0322	2.43	-4.5107	2.25805
hsa-miR-6509-5p	1.76e-06	7.46e-07	9.50638	6.3514	2.26794
hsa-miR-4721	0.00034	0.00017	5.4153	0.7783	2.2708
hsa-miR-563	0.000478	0.000242	5.19397	0.4123	2.28021
hsa-miR-4743-5p	0.00946	0.00583	3.36213	-2.8315	2.28191
hsa-miR-1468-3p	0.0473	0.034	2.39918	-4.5641	2.28835
hsa-miR-5187-5p	0.033	0.0228	2.6186	-4.1797	2.31097
hsa-miR-1470	0.026	0.0175	2.76411	-3.92	2.33252
hsa-miR-4309	0.0347	0.0242	2.58664	-4.2363	2.33565
hsa-miR-567	4.4e-05	2.05e-05	6.83528	2.9614	2.3369
hsa-miR-541-3p	0.000239	0.000118	5.6485	1.1565	2.35936
hsa-miR-520d-3p	0.0328	0.0226	2.62326	-4.1714	2.36385
hsa-miR-1301-3p	3e-06	1.3e-06	9.01474	5.7898	2.36612
hsa-miR-1538	7.42e-05	3.5e-05	6.45735	2.4082	2.37571
hsa-miR-7111-3p	0.0434	0.031	2.45007	-4.4759	2.37761
hsa-miR-6772-5p	0.000175	8.5e-05	5.85977	1.4924	2.37803
hsa-miR-4801	0.0398	0.0281	2.50487	-4.3802	2.3785
hsa-miR-6849-5p	9.81e-07	4.05e-07	10.075	6.9702	2.37941
hsa-miR-6731-5p	0.000142	6.81e-05	6.00553	1.7204	2.40096
hsa-miR-4435	2.51e-06	1.08e-06	9.17627	5.9772	2.404
hsa-miR-4675	5.74e-06	2.54e-06	8.44352	5.1042	2.41439
hsa-miR-6885-5p	0.000175	8.52e-05	5.85788	1.4894	2.41939
hsa-miR-503-5p	0.00936	0.00576	3.36922	-2.8185	2.42024
hsa-miR-1295a	0.0106	0.00663	3.2917	-2.9605	2.43134
hsa-miR-6511b-5p	0.0358	0.025	2.56824	-4.2688	2.44215
hsa-miR-4776-5p	0.000975	0.000513	4.7397	-0.3595	2.45578
hsa-miR-4478	5.4e-05	2.52e-05	6.68683	2.7464	2.46007
hsa-let-7a-3p	0.00198	0.00108	4.30597	-1.1201	2.48118
hsa-miR-6877-3p	5.51e-06	2.43e-06	8.48102	5.1504	2.4912
hsa-miR-298	0.000122	5.81e-05	6.11152	1.8844	2.49709
hsa-miR-6732-5p	0.0165	0.0107	3.03016	-3.4385	2.50915
hsa-miR-4640-3p	0.00149	0.000797	4.48022	-0.812	2.52054
hsa-miR-632	1.18e-05	5.34e-06	7.8434	4.3429	2.52087
hsa-miR-6893-5p	0.000953	0.0005	4.75477	-0.3334	2.52138
hsa-miR-4709-3p	4.13e-05	1.92e-05	6.88155	3.0277	2.53161
hsa-miR-5572	0.00258	0.00143	4.146	-1.4058	2.55575
hsa-miR-6885-3p	1.89e-07	1.82e-08	13.4115	10.0436	2.56364
hsa-miR-101-5p	3.15e-05	1.45e-05	7.08291	3.3132	2.58369
hsa-miR-4316	0.0305	0.0209	2.66764	-4.0925	2.59397
hsa-miR-3619-5p	0.0296	0.0202	2.68644	-4.059	2.60327
hsa-miR-874-3p	1.7e-05	7.75e-06	7.55481	3.961	2.60461
hsa-miR-6130	0.0308	0.0211	2.66189	-4.1028	2.61946
hsa-miR-597-3p	0.0262	0.0177	2.75777	-3.9313	2.6231
hsa-miR-6791-3p	0.03	0.0205	2.67649	-4.0767	2.62854
hsa-miR-6805-5p	0.027	0.0182	2.74073	-3.9619	2.62934
hsa-miR-505-3p	1.88e-05	8.57e-06	7.47733	3.8566	2.6392
hsa-miR-502-3p	0.00607	0.00361	3.62521	-2.3498	2.65003
hsa-miR-4255	0.0257	0.0173	2.76933	-3.9106	2.65459
hsa-miR-105-5p	0.0287	0.0195	2.70449	-4.0268	2.65664
hsa-miR-5692b	0.0263	0.0177	2.75589	-3.9347	2.65833
hsa-miR-4682	0.00262	0.00145	4.13593	-1.4239	2.6587
hsa-miR-6792-3p	4.99e-07	2.02e-07	10.754	7.6689	2.6599
hsa-miR-8054	2.07e-05	9.51e-06	7.39875	3.75	2.66041
hsa-miR-4685-3p	0.000105	5e-05	6.2133	2.0403	2.67611
hsa-miR-516a-3p	0.0255	0.0171	2.77535	-3.8998	2.67828
hsa-miR-6501-5p	0.00074	0.000382	4.91542	-0.0577	2.67834
hsa-miR-6852-5p	1.3e-06	5.44e-07	9.7965	6.6711	2.6821
hsa-miR-507	0.0259	0.0175	2.76483	-3.9187	2.68239
hsa-miR-6880-3p	0.00129	0.000688	4.56685	-0.66	2.6828
hsa-miR-3658	0.00013	6.21e-05	6.06716	1.816	2.69014
hsa-miR-3177-5p	4.01e-07	1.61e-07	10.9812	7.8935	2.69032
hsa-miR-34c-3p	0.00115	0.00061	4.63695	-0.5377	2.70792
hsa-miR-6756-3p	5.65e-06	2.49e-06	8.45907	5.1234	2.72386
hsa-miR-7114-3p	1.3e-05	5.87e-06	7.76987	4.2466	2.74403
hsa-miR-6884-3p	1.89e-07	1.61e-08	13.5595	10.1613	2.74493
hsa-miR-3065-3p	0.0262	0.0177	2.7586	-3.9299	2.74527
hsa-miR-519d-3p	0.000143	6.85e-05	6.00193	1.7149	2.74554
hsa-miR-18b-3p	1.05e-07	6.55e-09	14.7057	11.0274	2.75069
hsa-miR-4444	0.0045	0.00259	3.80913	-2.0145	2.76352
hsa-miR-6729-5p	0.0254	0.0171	2.77719	-3.8965	2.77165
hsa-miR-6782-3p	6.86e-07	2.81e-07	10.4276	7.3382	2.77306
hsa-miR-4695-5p	0.00298	0.00165	4.06279	-1.5553	2.78573
hsa-miR-6500-5p	0.00383	0.00217	3.90965	-1.832	2.78817
hsa-miR-6851-3p	0.000276	0.000137	5.55267	1.002	2.79895
hsa-miR-8074	5.49e-05	2.57e-05	6.67363	2.7272	2.81436
hsa-miR-4713-5p	0.00414	0.00236	3.86175	-1.9189	2.81914
hsa-miR-5699-3p	0.0244	0.0163	2.80114	-3.8534	2.82108
hsa-miR-3197	0.00398	0.00226	3.88669	-1.8736	2.82321
hsa-miR-33b-3p	0.000584	0.000299	5.06412	0.1945	2.82417
hsa-miR-6857-3p	2.35e-08	7.01e-10	17.9377	13.1047	2.83035
hsa-miR-7108-3p	2.24e-08	6.01e-10	18.1811	13.2426	2.83781
hsa-miR-6880-5p	2.85e-07	1.13e-07	11.3493	8.248	2.84256
hsa-miR-6861-3p	1.89e-07	3.75e-08	12.5603	9.3393	2.8456
hsa-miR-493-3p	7.81e-05	3.69e-05	6.41973	2.352	2.8524
hsa-miR-4787-5p	0.000944	0.000494	4.7617	-0.3215	2.86893
hsa-miR-377-5p	0.000148	7.14e-05	5.97432	1.6719	2.86956
hsa-miR-6503-3p	1.09e-07	6.95e-09	14.6288	10.9716	2.87278
hsa-miR-3663-5p	1.89e-07	3.32e-08	12.7	9.4583	2.87513
hsa-miR-6507-3p	1.89e-07	2.32e-08	13.1239	9.811	2.87817
hsa-miR-149-3p	0.00357	0.00201	3.95137	-1.7564	2.88209
hsa-miR-3132	0.00151	0.000812	4.46949	-0.8309	2.88701
hsa-miR-4429	0.00354	0.00199	3.95652	-1.7471	2.88771
hsa-miR-512-5p	0.000861	0.000449	4.81968	-0.2216	2.89244
hsa-miR-616-3p	2.03e-05	9.28e-06	7.41698	3.7748	2.89734
hsa-miR-1307-3p	4.55e-08	1.86e-09	16.4531	12.2109	2.90173
hsa-miR-4785	2.24e-08	5.9e-10	18.2123	13.2601	2.90789
hsa-miR-6853-5p	3.12e-07	1.25e-07	11.2492	8.1527	2.90792
hsa-miR-6890-3p	7.01e-08	3.9e-09	15.4021	11.5176	2.90815
hsa-miR-1254	0.00203	0.0011	4.29287	-1.1435	2.91088
hsa-miR-1237-5p	9.53e-07	3.92e-07	10.1056	7.0026	2.92275
hsa-miR-4484	0.000152	7.32e-05	5.95815	1.6467	2.92343
hsa-miR-4278	0.000769	0.000399	4.89038	-0.1005	2.92547
hsa-miR-6799-3p	1.29e-07	8.4e-09	14.3806	10.7895	2.92578
hsa-miR-519e-5p	0.0161	0.0104	3.04569	-3.4102	2.95219
hsa-miR-665	9.65e-06	4.31e-06	8.01276	4.5622	2.953
hsa-miR-708-5p	7.66e-08	4.41e-09	15.2352	11.4024	2.95594
hsa-miR-125b-2-3p	0.00585	0.00347	3.64785	-2.3085	2.95872
hsa-miR-3176	0.00456	0.00264	3.80005	-2.031	2.96156
hsa-miR-3178	0.000323	0.000161	5.44967	0.8345	2.968
hsa-miR-6134	0.0088	0.00537	3.40694	-2.7494	2.98768
hsa-miR-890	5.78e-08	3.01e-09	15.763	11.7617	2.99368
hsa-miR-550b-2-5p	0.000235	0.000116	5.6589	1.1731	2.99666
hsa-miR-6776-5p	0.00281	0.00156	4.095	-1.4974	3.00184
hsa-miR-6857-5p	0.0142	0.00908	3.12063	-3.2735	3.00235
hsa-miR-6775-3p	0.000429	0.000216	5.26384	0.5286	3.01435
hsa-miR-6759-5p	0.0338	0.0235	2.60311	-4.2071	3.01693
hsa-miR-6894-5p	0.000925	0.000484	4.77412	-0.3	3.02708
hsa-let-7f-1-3p	1.89e-07	1.6e-08	13.5716	10.1708	3.03185
hsa-miR-4449	5.51e-05	2.58e-05	6.67016	2.7221	3.04173
hsa-miR-6762-5p	2.77e-08	8.94e-10	17.5567	12.8842	3.04253
hsa-miR-3144-5p	7.15e-05	3.37e-05	6.48298	2.4463	3.04639
hsa-miR-4793-5p	0.00113	0.000597	4.64985	-0.5152	3.0486
hsa-miR-6757-3p	1.89e-07	1.89e-08	13.3674	10.0083	3.05332
hsa-miR-3678-3p	1.33e-05	6.03e-06	7.74841	4.2183	3.0551
hsa-miR-4475	3.21e-06	1.39e-06	8.9529	5.7174	3.06154
hsa-miR-513b-5p	3.08e-05	1.42e-05	7.10021	3.3375	3.06613
hsa-miR-155-5p	0.000819	0.000426	4.85021	-0.1692	3.06692
hsa-miR-6743-3p	9.66e-06	4.32e-06	8.01085	4.5597	3.07421
hsa-miR-4750-3p	4.94e-06	2.17e-06	8.57572	5.2662	3.07712
hsa-miR-4725-5p	0.000227	0.000111	5.68334	1.2123	3.08348
hsa-miR-513a-5p	5.5e-06	2.42e-06	8.48315	5.153	3.08542
hsa-miR-3190-5p	2.77e-07	1.1e-07	11.3833	8.2802	3.08672
hsa-miR-6876-5p	0.00014	6.68e-05	6.01868	1.7409	3.08832
hsa-miR-4482-5p	0.0209	0.0138	2.89202	-3.6894	3.09008
hsa-miR-615-3p	0.000224	0.00011	5.69459	1.2303	3.09271
hsa-miR-196a-3p	0.0183	0.012	2.97109	-3.546	3.10597
hsa-miR-3151-3p	0.00468	0.00271	3.78427	-2.0597	3.10816
hsa-miR-422a	0.00578	0.00341	3.65662	-2.2925	3.11063
hsa-miR-6855-3p	1.65e-08	3.72e-10	18.9663	13.6719	3.11763
hsa-miR-4733-5p	3.47e-08	1.26e-09	17.0342	12.572	3.12697
hsa-miR-4310	1.14e-07	7.42e-09	14.5425	10.9087	3.12714
hsa-miR-506-5p	5.67e-06	2.51e-06	8.4543	5.1175	3.13082
hsa-miR-1238-5p	0.000367	0.000185	5.36296	0.6924	3.13432
hsa-miR-4746-5p	1.05e-07	6.68e-09	14.6801	11.0089	3.14354
hsa-miR-525-5p	1.89e-07	1.56e-08	13.6051	10.1972	3.14435
hsa-miR-3622b-3p	1.39e-06	5.83e-07	9.73233	6.6011	3.14527
hsa-miR-3154	0.00139	0.000741	4.52299	-0.7368	3.14905
hsa-miR-2110	0.000382	0.000192	5.33703	0.6497	3.15079
hsa-miR-2114-5p	0.0179	0.0117	2.98466	-3.5213	3.15238
hsa-miR-3660	0.00351	0.00197	3.96278	-1.7358	3.15364
hsa-miR-30b-3p	1.18e-05	5.34e-06	7.84345	4.3429	3.15401
hsa-miR-6824-3p	5.21e-08	2.44e-09	16.0617	11.9589	3.15476
hsa-miR-6784-3p	4.57e-06	2e-06	8.64408	5.3491	3.15493
hsa-miR-2276-3p	0.00214	0.00117	4.26	-1.202	3.15808
hsa-miR-204-3p	9.05e-06	4.04e-06	8.06436	4.6283	3.16578
hsa-miR-5685	5.72e-08	2.94e-09	15.799	11.7857	3.1686
hsa-miR-365b-5p	2.05e-06	8.74e-07	9.36403	6.1914	3.1689
hsa-miR-664a-3p	1.05e-07	6.63e-09	14.689	11.0153	3.17008
hsa-miR-574-3p	0.00169	0.000912	4.40245	-0.9491	3.17165
hsa-miR-128-1-5p	0.00619	0.0037	3.61243	-2.3732	3.17456
hsa-miR-23c	1.54e-07	1.05e-08	14.0903	10.572	3.17582
hsa-miR-6074	1.89e-07	5.51e-08	12.1273	8.9618	3.17927
hsa-miR-299-3p	6.02e-05	2.83e-05	6.60401	2.6252	3.18321
hsa-miR-1276	1.09e-06	4.5e-07	9.97387	6.8625	3.18408
hsa-miR-3158-3p	1.63e-06	6.89e-07	9.57974	6.4331	3.18506
hsa-miR-3918	2.57e-08	8.21e-10	17.6887	12.9613	3.19516
hsa-miR-4269	1.37e-07	9.19e-09	14.265	10.7035	3.1952
hsa-miR-6887-5p	1.68e-06	7.07e-07	9.55543	6.4061	3.19629
hsa-miR-6769b-3p	1.89e-07	5.29e-08	12.1717	9.0011	3.20017
hsa-miR-579-5p	2.48e-08	7.75e-10	17.7792	13.0137	3.2174
hsa-miR-542-5p	0.000648	0.000333	4.99847	0.0835	3.21839
hsa-miR-6727-3p	0.000138	6.58e-05	6.02823	1.7557	3.22029
hsa-miR-424-3p	1.89e-07	4.73e-08	12.2981	9.1123	3.22167
hsa-miR-423-5p	0.000901	0.000471	4.79096	-0.271	3.2234
hsa-miR-885-3p	4.56e-08	1.91e-09	16.4133	12.1856	3.23385
hsa-miR-7161-5p	1.89e-07	5.51e-08	12.1267	8.9612	3.23579
hsa-miR-3622a-5p	2.01e-06	8.53e-07	9.3855	6.2157	3.23599
hsa-let-7b-3p	4.02e-08	1.58e-09	16.6925	12.3615	3.24029
hsa-miR-7846-3p	0.00626	0.00374	3.60646	-2.3841	3.24121
hsa-miR-432-5p	0.00608	0.00362	3.62438	-2.3514	3.24251
hsa-miR-127-5p	7.49e-05	3.54e-05	6.44997	2.3972	3.24396
hsa-miR-4520-2-3p	5.87e-05	2.76e-05	6.62266	2.6526	3.24988
hsa-miR-6722-5p	8.74e-05	4.14e-05	6.34085	2.2336	3.25423
hsa-miR-4728-3p	1.89e-07	2.19e-08	13.1907	9.8655	3.26159
hsa-miR-6825-5p	4.48e-06	1.96e-06	8.66105	5.3697	3.26296
hsa-miR-4293	0.000592	0.000304	5.05444	0.1782	3.26423
hsa-miR-6820-3p	4.58e-08	2e-09	16.351	12.1458	3.27853
hsa-miR-1275	5.09e-06	2.23e-06	8.55068	5.2357	3.29986
hsa-miR-551b-5p	7.08e-08	4e-09	15.3707	11.496	3.3021
hsa-miR-6827-5p	1.09e-08	2.15e-10	19.9046	14.1558	3.3068
hsa-miR-3120-3p	1.17e-06	4.89e-07	9.89605	6.7789	3.30762
hsa-miR-874-5p	7.27e-08	4.13e-09	15.3247	11.4644	3.3117
hsa-miR-2116-5p	0.0161	0.0104	3.04425	-3.4128	3.31377
hsa-miR-4436b-5p	0.000594	0.000305	5.05233	0.1746	3.31688
hsa-miR-5587-5p	1.06e-08	1.93e-10	20.0922	14.2489	3.31827
hsa-miR-5093	2.64e-06	1.13e-06	9.13246	5.9267	3.32138
hsa-miR-4758-3p	3.8e-07	1.52e-07	11.0413	7.9521	3.32237
hsa-miR-634	6.48e-07	2.64e-07	10.4872	7.3993	3.32257
hsa-miR-2116-3p	1.81e-07	1.28e-08	13.8421	10.3821	3.32934
hsa-miR-4315	1.89e-07	3.88e-08	12.5228	9.3072	3.33085
hsa-miR-646	2.99e-06	1.29e-06	9.01987	5.7958	3.33787
hsa-miR-4312	1.33e-07	8.91e-09	14.3057	10.7338	3.34023
hsa-miR-1908-5p	9.95e-07	4.11e-07	10.0605	6.9548	3.34044
hsa-miR-658	2.67e-05	1.23e-05	7.20736	3.4869	3.35181
hsa-miR-3130-5p	0.00692	0.00416	3.54696	-2.4929	3.35552
hsa-miR-6731-3p	2.38e-08	7.32e-10	17.8681	13.0649	3.35612
hsa-miR-378f	0.000287	0.000142	5.52643	0.9595	3.36336
hsa-miR-1243	0.000172	8.35e-05	5.87091	1.5099	3.37224
hsa-miR-3939	6.83e-06	3.04e-06	8.29646	4.9216	3.37983
hsa-miR-6882-5p	9.72e-08	5.82e-09	14.8613	11.1392	3.3831
hsa-miR-671-3p	1.53e-07	1.04e-08	14.107	10.5846	3.38755
hsa-miR-6753-3p	6.36e-06	2.82e-06	8.35662	4.9966	3.38813
hsa-miR-4701-5p	1.64e-07	1.14e-08	13.9944	10.499	3.38944
hsa-miR-1270	3.52e-05	1.63e-05	7.00011	3.1965	3.40073
hsa-miR-3150b-5p	1.89e-07	5.45e-08	12.1383	8.9715	3.40174
hsa-miR-1228-5p	0.00107	0.000564	4.68348	-0.4568	3.41528
hsa-miR-6516-5p	1.23e-06	5.13e-07	9.85127	6.7305	3.42902
hsa-miR-4319	1.82e-05	8.3e-06	7.50227	3.8903	3.43021
hsa-miR-2681-3p	1.18e-05	5.31e-06	7.8477	4.3485	3.43433
hsa-miR-766-5p	8.65e-09	1.35e-10	20.7328	14.5586	3.43908
hsa-miR-6871-5p	0.00352	0.00198	3.96093	-1.7391	3.44941
hsa-miR-4436b-3p	1.89e-07	3.21e-08	12.7398	9.4919	3.47037
hsa-miR-510-3p	1.89e-07	3.7e-08	12.5759	9.3526	3.4788
hsa-miR-625-5p	0.00134	0.000713	4.5459	-0.6967	3.47962
hsa-miR-7844-5p	0.000511	0.00026	5.14975	0.3384	3.48751
hsa-miR-4673	3.9e-07	1.57e-07	11.0119	7.9235	3.49997
hsa-miR-942-3p	0.000159	7.7e-05	5.92424	1.5936	3.50326
hsa-miR-4717-3p	3.85e-08	1.48e-09	16.7858	12.4195	3.50919
hsa-miR-3617-5p	1.9e-07	7.48e-08	11.7907	8.6587	3.51271
hsa-miR-1291	9.16e-05	4.35e-05	6.30808	2.1842	3.51393
hsa-miR-3928-5p	4.07e-08	1.63e-09	16.6469	12.333	3.51394
hsa-let-7d-3p	1.89e-07	1.49e-08	13.6592	10.2397	3.52498
hsa-miR-4728-5p	1.89e-07	5.84e-08	12.0613	8.903	3.53941
hsa-miR-4494	2.34e-08	6.38e-10	18.0853	13.1886	3.53997
hsa-miR-5708	3.3e-08	1.17e-09	17.1466	12.6402	3.5413
hsa-miR-7851-3p	2.33e-06	9.98e-07	9.24575	6.0569	3.5426
hsa-miR-5580-3p	3.03e-08	1.01e-09	17.363	12.7698	3.54727
hsa-miR-7154-3p	4.85e-07	1.96e-07	10.7842	7.6989	3.54801
hsa-miR-4420	2.29e-06	9.79e-07	9.26274	6.0763	3.55443
hsa-miR-604	1.89e-07	4.7e-08	12.3033	9.1168	3.56671
hsa-miR-92b-3p	2.94e-07	1.17e-07	11.3144	8.2149	3.57335
hsa-miR-1273f	1.09e-06	4.53e-07	9.96917	6.8574	3.57443
hsa-miR-501-3p	1.41e-05	6.38e-06	7.7044	4.1602	3.57966
hsa-miR-4664-3p	5.24e-09	4.49e-11	22.8224	15.4839	3.58083
hsa-miR-4700-5p	1.04e-05	4.68e-06	7.94789	4.4786	3.58372
hsa-miR-518a-5p	0.00209	0.00114	4.27598	-1.1735	3.58696
hsa-miR-128-2-5p	2.01e-08	4.93e-10	18.5016	13.4206	3.59331
hsa-miR-1909-5p	7.28e-08	4.16e-09	15.3148	11.4575	3.59721
hsa-miR-2277-5p	2.24e-06	9.57e-07	9.28316	6.0996	3.60543
hsa-miR-3189-5p	2.35e-08	7.06e-10	17.9265	13.0984	3.60811
hsa-miR-4676-5p	5.7e-08	2.91e-09	15.8124	11.7946	3.60958
hsa-miR-6812-3p	1.75e-08	4.02e-10	18.8354	13.6019	3.61427
hsa-miR-6836-3p	7.01e-08	3.92e-09	15.398	11.5148	3.64148
hsa-miR-627-5p	2.87e-07	1.14e-07	11.3384	8.2376	3.64524
hsa-miR-2277-3p	0.000707	0.000366	4.94264	-0.0113	3.64607
hsa-miR-4476	0.000909	0.000475	4.78508	-0.2812	3.64769
hsa-miR-6806-5p	8.65e-08	5.12e-09	15.0349	11.2623	3.66544
hsa-miR-3174	0.0014	0.00075	4.5156	-0.7498	3.67022
hsa-miR-362-5p	0.00049	0.000249	5.17693	0.3839	3.67225
hsa-miR-3187-5p	1.87e-05	8.52e-06	7.48216	3.8631	3.67497
hsa-miR-6836-5p	3.91e-07	1.57e-07	11.0093	7.9209	3.67916
hsa-miR-4529-3p	4.52e-07	1.82e-07	10.8578	7.772	3.68947
hsa-miR-631	4.39e-09	2.79e-11	23.7897	15.8728	3.70237
hsa-miR-4640-5p	1.64e-06	6.9e-07	9.5776	6.4307	3.70341
hsa-miR-6830-5p	1.51e-07	1.02e-08	14.1306	10.6025	3.7098
hsa-miR-4287	0.000251	0.000124	5.61718	1.1061	3.71986
hsa-miR-5189-5p	0.0018	0.000974	4.36399	-1.0172	3.72214
hsa-miR-4740-5p	1.85e-08	4.32e-10	18.717	13.5381	3.72532
hsa-miR-1295b-3p	1.06e-08	1.98e-10	20.0498	14.228	3.7326
hsa-miR-514b-3p	2.81e-07	1.12e-07	11.3637	8.2617	3.73433
hsa-miR-583	0.00118	0.000624	4.62383	-0.5605	3.73871
hsa-miR-339-3p	4.7e-07	1.9e-07	10.8166	7.7312	3.74013
hsa-miR-6868-5p	4.77e-05	2.23e-05	6.77493	2.8744	3.75407
hsa-miR-513c-3p	3.94e-05	1.83e-05	6.91613	3.0772	3.76526
hsa-miR-6863	2.92e-06	1.26e-06	9.04181	5.8214	3.78242
hsa-miR-5011-5p	0.0323	0.0222	2.63257	-4.1549	3.79334
hsa-miR-6508-3p	0.0317	0.0218	2.64389	-4.1348	3.80323
hsa-miR-513c-5p	1.26e-05	5.7e-06	7.79237	4.2761	3.80619
hsa-miR-4736	6.13e-07	2.5e-07	10.5427	7.4559	3.80789
hsa-miR-6889-3p	3.11e-08	1.08e-09	17.2694	12.714	3.81041
hsa-miR-516b-5p	0.0172	0.0111	3.00902	-3.477	3.81521
hsa-miR-511-3p	6.63e-08	3.56e-09	15.529	11.6042	3.81906
hsa-miR-1321	1.89e-07	3.82e-08	12.5404	9.3223	3.82579
hsa-miR-2681-5p	1.26e-06	5.25e-07	9.82992	6.7074	3.83202
hsa-miR-6735-5p	1.67e-07	1.16e-08	13.9681	10.4789	3.83275
hsa-miR-378j	0.000397	0.0002	5.31332	0.6105	3.83359
hsa-miR-1258	2.19e-08	5.53e-10	18.3164	13.3182	3.85184
hsa-miR-5094	2.91e-06	1.25e-06	9.04561	5.8259	3.85417
hsa-miR-7856-5p	9.87e-08	6e-09	14.8216	11.1107	3.85879
hsa-miR-4462	0.000152	7.31e-05	5.95848	1.6472	3.86411
hsa-miR-1286	1.11e-05	4.98e-06	7.89929	4.4156	3.87819
hsa-miR-3978	1.89e-07	6.85e-08	11.8874	8.7466	3.88903
hsa-miR-372-5p	1.89e-07	5.01e-08	12.2334	9.0555	3.89257
hsa-miR-3152-3p	1.89e-07	3.21e-08	12.7396	9.4918	3.90833
hsa-miR-629-5p	1.09e-08	2.11e-10	19.9303	14.1686	3.91152
hsa-miR-6730-3p	3.67e-05	1.7e-05	6.96876	3.1521	3.93143
hsa-miR-7156-3p	1.89e-07	3.88e-08	12.523	9.3073	3.9323
hsa-miR-3944-5p	1.89e-07	6.36e-08	11.9674	8.8189	3.93606
hsa-miR-6892-5p	6.95e-09	7.92e-11	21.7182	15.0103	3.95611
hsa-miR-663b	1.89e-07	1.88e-08	13.3764	10.0155	3.96323
hsa-miR-6737-5p	4.56e-08	1.9e-09	16.4189	12.1891	3.96324
hsa-miR-6862-5p	6.95e-09	7.25e-11	21.8872	15.085	4.01533
hsa-miR-4518	2.02e-05	9.24e-06	7.42085	3.78	4.0191
hsa-miR-6745	6.18e-07	2.52e-07	10.5347	7.4478	4.02341
hsa-miR-378c	2.85e-07	1.13e-07	11.3506	8.2492	4.02678
hsa-miR-6718-5p	1.89e-07	1.84e-08	13.3989	10.0336	4.0307
hsa-miR-4660	1.89e-07	4.29e-08	12.4073	9.2074	4.0339
hsa-miR-6129	0.000228	0.000112	5.67953	1.2062	4.04948
hsa-miR-509-3-5p	8.81e-07	3.62e-07	10.1823	7.0834	4.05138
hsa-miR-4531	1.17e-06	4.88e-07	9.89842	6.7815	4.06743
hsa-miR-4535	1.15e-05	5.18e-06	7.86815	4.3752	4.07097
hsa-miR-431-3p	0.0189	0.0125	2.94849	-3.587	4.07175
hsa-miR-5010-5p	4.56e-09	3.37e-11	23.3967	15.7176	4.08947
hsa-miR-1301-5p	9.74e-08	5.87e-09	14.85	11.1311	4.09261
hsa-miR-3151-5p	3.94e-07	1.59e-07	10.9997	7.9115	4.09622
hsa-miR-4737	6.22e-09	5.8e-11	22.3162	15.2709	4.10407
hsa-miR-4436a	1.89e-07	4.72e-08	12.3002	9.1141	4.1184
hsa-miR-1307-5p	2.87e-07	1.14e-07	11.3405	8.2396	4.11982
hsa-miR-5089-3p	0.000135	6.46e-05	6.04079	1.7752	4.12655
hsa-miR-3064-5p	1.93e-08	4.59e-10	18.6184	13.4845	4.12704
hsa-miR-1273e	4.87e-09	3.98e-11	23.063	15.5828	4.1324
hsa-miR-3190-3p	6.95e-09	8.31e-11	21.6275	14.9699	4.13352
hsa-miR-4506	0.0011	0.000581	4.6663	-0.4866	4.14642
hsa-miR-3193	9.69e-07	4e-07	10.0871	6.983	4.15497
hsa-miR-6081	6.49e-07	2.65e-07	10.484	7.3961	4.15583
hsa-miR-99b-3p	8.72e-09	1.46e-10	20.5902	14.4907	4.18695
hsa-miR-4635	2.98e-07	1.19e-07	11.2981	8.1993	4.19238
hsa-miR-5195-5p	1.51e-05	6.88e-06	7.6455	4.0821	4.20444
hsa-miR-373-3p	1.33e-07	8.87e-09	14.3113	10.738	4.20643
hsa-miR-588	0.000213	0.000104	5.7268	1.2817	4.21556
hsa-miR-4749-5p	3.29e-09	1.89e-11	24.609	16.1846	4.21691
hsa-miR-6884-5p	1.23e-06	5.14e-07	9.84911	6.7282	4.22399
hsa-miR-3155a	9.91e-08	6.09e-09	14.8013	11.0962	4.2303
hsa-miR-4450	1.89e-07	5.32e-08	12.1656	8.9957	4.23918
hsa-miR-7111-5p	3.49e-08	1.27e-09	17.0135	12.5594	4.24229
hsa-miR-6511a-5p	6.22e-09	5.81e-11	22.3155	15.2706	4.24657
hsa-miR-188-3p	4.61e-05	2.15e-05	6.79992	2.9105	4.25586
hsa-miR-6083	1.52e-08	3.37e-10	19.1338	13.7605	4.25654
hsa-miR-8075	2.29e-07	9.01e-08	11.59	8.4739	4.25755
hsa-miR-500a-3p	0.00029	0.000144	5.51963	0.9484	4.26195
hsa-miR-509-5p	1.52e-08	3.38e-10	19.1258	13.7563	4.26273
hsa-miR-4421	6.66e-08	3.63e-09	15.5042	11.5873	4.26467
hsa-miR-2467-3p	8.65e-09	1.38e-10	20.689	14.5378	4.26715
hsa-miR-3936	0.000181	8.81e-05	5.83638	1.4555	4.26879
hsa-miR-367-3p	1.67e-07	1.17e-08	13.9618	10.4741	4.27591
hsa-miR-6858-3p	1.35e-06	5.66e-07	9.7598	6.6312	4.27654
hsa-miR-4451	5.66e-05	2.66e-05	6.64963	2.6921	4.29441
hsa-miR-10b-3p	0.000445	0.000225	5.24034	0.4896	4.29617
hsa-miR-6132	1.74e-06	7.34e-07	9.52162	6.3684	4.29931
hsa-miR-6859-5p	3.3e-08	1.16e-09	17.1523	12.6436	4.3034
hsa-miR-4725-3p	1.89e-07	2.5e-08	13.0313	9.7351	4.30673
hsa-miR-3680-3p	1.37e-06	5.76e-07	9.74382	6.6137	4.30804
hsa-miR-3177-3p	3.59e-08	1.33e-09	16.9539	12.523	4.31605
hsa-miR-513a-3p	5.54e-06	2.44e-06	8.4766	5.1449	4.3192
hsa-miR-4726-5p	1.44e-06	6.08e-07	9.69407	6.5592	4.32565
hsa-miR-6075	3.86e-08	1.5e-09	16.7672	12.4079	4.34413
hsa-miR-4642	1.36e-08	2.85e-10	19.4151	13.9071	4.35687
hsa-miR-4441	0.000758	0.000393	4.89941	-0.085	4.37306
hsa-miR-4768-3p	5.21e-08	2.47e-09	16.0461	11.9487	4.37622
hsa-miR-205-5p	9.53e-09	1.67e-10	20.3483	14.3743	4.38597
hsa-miR-3614-5p	2.84e-08	9.27e-10	17.5003	12.8511	4.38896
hsa-miR-605-5p	2.24e-08	5.81e-10	18.2362	13.2735	4.38925
hsa-miR-662	2.34e-08	6.5e-10	18.056	13.172	4.395
hsa-miR-7113-5p	1.62e-07	1.12e-08	14.0165	10.5159	4.3961
hsa-miR-4251	1.89e-07	1.37e-08	13.7654	10.3226	4.4015
hsa-miR-518c-5p	3.28e-07	1.31e-07	11.1936	8.0994	4.41383
hsa-miR-1203	2.32e-07	9.15e-08	11.5742	8.4592	4.42147
hsa-miR-3173-3p	7.4e-09	9.79e-11	21.321	14.8316	4.42284
hsa-miR-623	2.24e-08	5.98e-10	18.1896	13.2474	4.42656
hsa-miR-5192	1.89e-07	5.42e-08	12.1452	8.9776	4.44016
hsa-miR-6737-3p	1.29e-07	8.51e-09	14.3642	10.7773	4.44485
hsa-miR-617	8.17e-07	3.35e-07	10.2557	7.1603	4.44942
hsa-miR-371b-5p	8.36e-06	3.73e-06	8.12887	4.7105	4.45065
hsa-miR-4428	4.97e-07	2.01e-07	10.7578	7.6726	4.45721
hsa-miR-6790-3p	4.56e-08	1.93e-09	16.3967	12.175	4.4581
hsa-miR-3202	1.89e-07	1.98e-08	13.3082	9.9607	4.46057
hsa-miR-1298-3p	4.72e-06	2.07e-06	8.61512	5.3141	4.46665
hsa-miR-494-3p	5.18e-07	2.1e-07	10.716	7.6309	4.48587
hsa-miR-1249-5p	0.000143	6.87e-05	6.00025	1.7122	4.51507
hsa-miR-1182	3.13e-07	1.25e-07	11.2424	8.1462	4.51805
hsa-miR-6890-5p	1.89e-07	1.46e-08	13.6802	10.2561	4.52017
hsa-miR-4786-5p	1.76e-06	7.47e-07	9.50523	6.3502	4.52577
hsa-miR-4655-5p	1.89e-07	2.51e-08	13.0267	9.7312	4.52742
hsa-miR-4732-5p	1.89e-07	1.49e-08	13.6612	10.2413	4.54584
hsa-miR-2117	3.28e-06	1.43e-06	8.93192	5.6927	4.55394
hsa-miR-6787-5p	4.39e-09	3.08e-11	23.585	15.7924	4.55762
hsa-miR-4644	6.95e-09	8.38e-11	21.6124	14.9632	4.56364
hsa-miR-5684	2.48e-06	1.06e-06	9.19043	5.9935	4.56402
hsa-miR-572	1.35e-06	5.68e-07	9.75675	6.6278	4.57413
hsa-miR-3607-5p	0.000198	9.68e-05	5.7746	1.3577	4.57494
hsa-miR-4260	8.95e-07	3.68e-07	10.1666	7.0669	4.58669
hsa-miR-6817-5p	3.19e-06	1.38e-06	8.95798	5.7234	4.59601
hsa-miR-2114-3p	1.11e-07	7.13e-09	14.5945	10.9467	4.60159
hsa-miR-5588-3p	3.12e-06	1.35e-06	8.97895	5.748	4.62228
hsa-miR-6801-5p	3.22e-06	1.4e-06	8.94774	5.7113	4.62489
hsa-miR-6838-5p	2.22e-07	8.76e-08	11.6208	8.5024	4.62644
hsa-miR-1285-3p	2.38e-06	1.02e-06	9.22617	6.0345	4.63409
hsa-miR-6760-5p	9.03e-09	1.55e-10	20.4841	14.4399	4.64149
hsa-miR-4418	1.89e-07	6.63e-08	11.9231	8.7789	4.64935
hsa-miR-4654	1.06e-08	1.97e-10	20.0547	14.2304	4.65058
hsa-miR-6837-5p	4.81e-08	2.13e-09	16.2548	12.0841	4.65252
hsa-miR-5691	6.65e-07	2.72e-07	10.4596	7.3711	4.65752
hsa-miR-6796-5p	5.21e-08	2.42e-09	16.0747	11.9674	4.65963
hsa-miR-6886-5p	3.31e-08	1.18e-09	17.1258	12.6276	4.68122
hsa-miR-4685-5p	2.1e-05	9.64e-06	7.38825	3.7357	4.68447
hsa-miR-6500-3p	4.41e-08	1.78e-09	16.5135	12.2491	4.68667
hsa-miR-526b-5p	2.46e-07	9.74e-08	11.5076	8.3971	4.68926
hsa-miR-4684-3p	1.69e-06	7.15e-07	9.54538	6.3949	4.70284
hsa-miR-3935	7.61e-06	3.39e-06	8.20677	4.809	4.70712
hsa-miR-345-5p	7.4e-09	9.61e-11	21.3544	14.8469	4.70763
hsa-miR-550a-3-5p	4.56e-08	1.92e-09	16.4089	12.1828	4.72112
hsa-miR-938	6.87e-06	3.05e-06	8.29144	4.9154	4.72493
hsa-miR-6809-5p	6.54e-05	3.08e-05	6.54593	2.5396	4.73188
hsa-miR-4520-3p	1.89e-07	3.29e-08	12.7116	9.468	4.73532
hsa-miR-4296	1.89e-07	2.71e-08	12.9385	9.6582	4.73723
hsa-miR-7157-5p	2.88e-09	1.28e-11	25.4507	16.4892	4.73911
hsa-miR-8052	9.87e-08	6.03e-09	14.8153	11.1062	4.74022
hsa-miR-4430	0.000155	7.48e-05	5.94382	1.6243	4.74607
hsa-miR-5571-5p	6.59e-06	2.92e-06	8.32748	4.9604	4.749
hsa-miR-489-3p	6.24e-08	3.3e-09	15.6348	11.6757	4.76243
hsa-miR-6861-5p	1.89e-07	1.67e-08	13.5201	10.1301	4.76352
hsa-miR-5584-5p	4.87e-09	3.84e-11	23.1355	15.6124	4.76863
hsa-miR-4659a-3p	1.04e-07	6.5e-09	14.7156	11.0345	4.79797
hsa-miR-4294	0.000266	0.000132	5.57711	1.0415	4.80314
hsa-miR-4487	7.4e-09	9.69e-11	21.3396	14.8401	4.81136
hsa-miR-3934-5p	0.000366	0.000184	5.3661	0.6975	4.82588
hsa-miR-5696	8.65e-08	5.06e-09	15.0494	11.2725	4.8284
hsa-miR-198	0.000145	6.97e-05	5.99062	1.6973	4.84048
hsa-miR-6777-5p	6.95e-09	7.98e-11	21.7055	15.0047	4.84679
hsa-miR-6507-5p	4.67e-08	2.05e-09	16.3086	12.1187	4.86143
hsa-miR-7157-3p	6.66e-08	3.6e-09	15.5133	11.5935	4.88768
hsa-miR-3186-3p	9.91e-06	4.44e-06	7.99026	4.5332	4.90685
hsa-miR-512-3p	1.13e-07	7.27e-09	14.5683	10.9275	4.90727
hsa-miR-1208	2.61e-07	1.03e-07	11.4435	8.3369	4.90855
hsa-miR-4425	1.89e-07	6.48e-08	11.9482	8.8016	4.91313
hsa-miR-4753-5p	0.000814	0.000423	4.85437	-0.1621	4.94831
hsa-miR-4486	4.58e-08	1.99e-09	16.3516	12.1462	4.95052
hsa-miR-3666	3.02e-08	1e-09	17.3823	12.7813	4.95127
hsa-miR-4690-5p	2.88e-09	1.39e-11	25.2712	16.4255	4.95238
hsa-miR-4710	3.87e-06	1.69e-06	8.78704	5.5209	4.95862
hsa-miR-6720-3p	1.89e-07	4.74e-08	12.295	9.1096	4.97451
hsa-miR-6785-5p	7.51e-06	3.34e-06	8.21819	4.8234	4.98552
hsa-miR-6877-5p	4.01e-06	1.75e-06	8.7563	5.4842	4.99264
hsa-miR-4659b-5p	2.83e-06	1.22e-06	9.07121	5.8557	4.99504
hsa-miR-4657	5.65e-06	2.5e-06	8.45776	5.1218	5.00116
hsa-miR-3915	5.45e-07	2.21e-07	10.6634	7.578	5.00158
hsa-miR-4533	1.89e-07	1.63e-08	13.5497	10.1535	5.00696
hsa-miR-1247-3p	1.89e-07	1.37e-08	13.7595	10.318	5.01779
hsa-miR-4513	3.7e-08	1.38e-09	16.8919	12.485	5.02474
hsa-miR-1266-5p	3.76e-05	1.74e-05	6.95027	3.1258	5.04204
hsa-miR-6748-5p	5.7e-08	2.87e-09	15.8318	11.8075	5.05596
hsa-miR-4784	1.32e-08	2.68e-10	19.5224	13.9623	5.06183
hsa-miR-3692-5p	7.63e-06	3.4e-06	8.20331	4.8047	5.0676
hsa-miR-3147	2.35e-08	6.99e-10	17.9412	13.1067	5.07234
hsa-miR-4773	9.65e-08	5.74e-09	14.8799	11.1524	5.07458
hsa-miR-1180-3p	1.35e-09	1.05e-12	31.5912	18.3134	5.07729
hsa-miR-4502	8.65e-09	1.35e-10	20.7264	14.5555	5.08378
hsa-miR-4658	1.33e-07	8.83e-09	14.3171	10.7423	5.10686
hsa-miR-5001-5p	5.53e-08	2.75e-09	15.8934	11.8484	5.12258
hsa-miR-8073	2.01e-08	4.91e-10	18.5075	13.4238	5.13104
hsa-miR-3121-3p	2.95e-06	1.27e-06	9.03002	5.8077	5.13868
hsa-miR-4750-5p	3.86e-07	1.55e-07	11.0246	7.9359	5.14064
hsa-miR-6736-5p	1.89e-07	3.42e-08	12.6672	9.4304	5.15284
hsa-miR-934	4.07e-08	1.63e-09	16.6497	12.3348	5.15631
hsa-miR-3122	1.98e-07	7.77e-08	11.7497	8.6212	5.15664
hsa-miR-6823-5p	2.1e-06	8.93e-07	9.3449	6.1698	5.16914
hsa-miR-8078	5.26e-08	2.56e-09	15.9933	11.9141	5.1851
hsa-miR-6850-3p	2.17e-06	9.26e-07	9.31174	6.1321	5.19683
hsa-miR-6739-5p	1.56e-09	2.24e-12	29.5985	17.7893	5.21027
hsa-miR-4311	6.32e-08	3.37e-09	15.6059	11.6562	5.21397
hsa-miR-4756-3p	1.76e-06	7.44e-07	9.50948	6.3549	5.22881
hsa-miR-6815-5p	5.78e-08	3.02e-09	15.7613	11.7605	5.23065
hsa-miR-758-5p	9.59e-07	3.95e-07	10.0982	6.9947	5.231
hsa-miR-4519	2.46e-07	9.72e-08	11.5094	8.3988	5.24504
hsa-miR-1262	1.14e-06	4.72e-07	9.92915	6.8145	5.25055
hsa-miR-4483	1.12e-05	5.03e-06	7.89082	4.4046	5.25523
hsa-miR-4470	2.88e-09	1.46e-11	25.165	16.3875	5.25983
hsa-miR-921	1.89e-07	1.96e-08	13.3222	9.9719	5.31307
hsa-miR-640	7.52e-07	3.08e-07	10.3376	7.2454	5.31515
hsa-miR-6782-5p	4.9e-08	2.21e-09	16.2007	12.0492	5.32015
hsa-miR-6068	5.21e-08	2.5e-09	16.0288	11.9374	5.32196
hsa-miR-3124-5p	3.84e-08	1.45e-09	16.8196	12.4404	5.33804
hsa-miR-6847-5p	5.51e-05	2.58e-05	6.66991	2.7217	5.34313
hsa-miR-598-5p	1.89e-07	6.31e-08	11.9771	8.8276	5.34438
hsa-miR-4769-5p	7.01e-08	3.93e-09	15.3936	11.5117	5.34619
hsa-miR-8077	1.33e-08	2.75e-10	19.4786	13.9398	5.34738
hsa-miR-3926	2.88e-09	7.52e-12	26.6522	16.8985	5.40762
hsa-miR-4665-5p	5.21e-08	2.52e-09	16.0174	11.9299	5.4142
hsa-miR-519e-3p	5.7e-08	2.9e-09	15.8183	11.7986	5.42811
hsa-miR-6747-5p	2.88e-09	1.02e-11	25.9598	16.6662	5.42981
hsa-miR-1227-5p	1.31e-06	5.5e-07	9.78765	6.6615	5.43241
hsa-miR-711	2.34e-08	6.55e-10	18.0442	13.1654	5.47856
hsa-miR-6860	2.35e-08	7.12e-10	17.9125	13.0903	5.49713
hsa-miR-6788-5p	2.35e-08	6.82e-10	17.9795	13.1286	5.51634
hsa-miR-3682-3p	1.89e-07	2.05e-08	13.2692	9.9292	5.52534
hsa-miR-4498	5.31e-06	2.33e-06	8.51383	5.1906	5.54744
hsa-miR-6781-5p	1.89e-07	2.46e-08	13.0542	9.7538	5.56259
hsa-miR-936	4.85e-08	2.17e-09	16.2301	12.0682	5.56643
hsa-miR-6798-5p	1.81e-07	1.28e-08	13.8471	10.3859	5.57588
hsa-miR-8085	2.02e-08	5.03e-10	18.4684	13.4024	5.57825
hsa-miR-1261	4.39e-09	3.08e-11	23.584	15.792	5.57958
hsa-miR-8064	1.04e-07	6.45e-09	14.7261	11.0421	5.58964
hsa-miR-4522	7.72e-05	3.65e-05	6.42874	2.3655	5.59383
hsa-miR-4697-5p	2.5e-05	1.15e-05	7.25819	3.5572	5.60006
hsa-miR-7155-3p	2.35e-08	6.87e-10	17.9698	13.1231	5.6414
hsa-miR-4419b	8.65e-08	5.08e-09	15.0445	11.2691	5.66225
hsa-miR-3925-5p	1.89e-07	6.82e-08	11.8908	8.7498	5.66692
hsa-miR-4280	1.89e-07	3.37e-08	12.6851	9.4456	5.6722
hsa-miR-4740-3p	3.85e-08	1.48e-09	16.7876	12.4206	5.68975
hsa-miR-4778-5p	5.7e-05	2.68e-05	6.64437	2.6844	5.69482
hsa-miR-7162-3p	2.48e-08	7.81e-10	17.7663	13.0063	5.74597
hsa-miR-7109-5p	4.58e-08	2e-09	16.3507	12.1456	5.76021
hsa-miR-3163	7.96e-08	4.62e-09	15.1733	11.3593	5.82324
hsa-miR-6872-5p	4.02e-07	1.62e-07	10.9772	7.8896	5.8255
hsa-miR-3117-3p	5.62e-07	2.28e-07	10.6319	7.5463	5.83905
hsa-miR-500b-5p	1.43e-08	3.06e-10	19.2929	13.8438	5.86257
hsa-miR-4694-3p	1.15e-06	4.8e-07	9.91337	6.7975	5.86472
hsa-miR-452-5p	3.1e-08	1.06e-09	17.291	12.7269	5.90706
hsa-miR-3605-5p	2.02e-06	8.59e-07	9.37945	6.2089	5.93793
hsa-miR-3192-5p	8.72e-09	1.43e-10	20.6229	14.5063	5.96323
hsa-miR-206	5.2e-08	2.37e-09	16.1034	11.9861	5.97543
hsa-miR-4638-5p	2.37e-06	1.01e-06	9.23166	6.0408	6.03353
hsa-miR-765	5.53e-08	2.75e-09	15.8899	11.846	6.09989
hsa-miR-513b-3p	5.21e-08	2.49e-09	16.032	11.9395	6.10699
hsa-miR-6795-5p	1.89e-07	2.56e-08	13.0041	9.7126	6.15452
hsa-miR-6873-5p	1.09e-08	2.16e-10	19.893	14.15	6.15921
hsa-miR-622	1.89e-07	2.22e-08	13.1714	9.8498	6.16653
hsa-miR-193a-5p	3.09e-08	1.05e-09	17.3144	12.7409	6.17956
hsa-miR-3161	8.65e-09	1.26e-10	20.8488	14.6132	6.17973
hsa-miR-8055	7.01e-08	3.92e-09	15.3966	11.5138	6.20274
hsa-miR-6753-5p	4.26e-06	1.86e-06	8.70495	5.4226	6.29127
hsa-miR-7151-3p	5.21e-08	2.43e-09	16.0649	11.961	6.2952
hsa-miR-1193	1.89e-07	1.89e-08	13.3651	10.0064	6.36861
hsa-miR-1910-3p	1.56e-09	2.44e-12	29.385	17.7296	6.40211
hsa-miR-9500	3.29e-09	1.92e-11	24.5715	16.1707	6.43593
hsa-miR-1471	5.3e-08	2.6e-09	15.9703	11.899	6.46163
hsa-miR-6845-5p	2.88e-09	1.41e-11	25.2427	16.4154	6.51179
hsa-miR-4667-5p	7.57e-09	1.03e-10	21.2235	14.7871	6.64796
hsa-miR-193b-5p	6.44e-09	6.27e-11	22.1666	15.2067	6.72962
hsa-miR-6765-5p	8.65e-09	1.28e-10	20.8242	14.6017	6.74314
hsa-miR-4636	1.89e-07	2.77e-08	12.9112	9.6356	6.75007
hsa-miR-4446-3p	1.35e-09	6.01e-13	33.1558	18.6869	6.81553
hsa-miR-7515	6.95e-09	8.39e-11	21.61	14.9621	7.46025
hsa-miR-5699-5p	2.26e-09	4.39e-12	27.9263	17.3022	7.53657
hsa-miR-6082	2.88e-09	1.24e-11	25.515	16.5118	7.65119
hsa-miR-1273c	2.88e-09	1.12e-11	25.7437	16.5917	7.86332
hsa-miR-3654	8.65e-09	1.26e-10	20.8607	14.6188	7.92111
