# Supplementary material for: Construction of Potential miRNA-mRNA Regulatory Network in AMI Plasma by Bioinformatics Analysis
Source: Research Square preprint supplement (doi:10.21203/rs.3.rs-1250640/v1), 2022-01-17
Supplement: Supplementary file 3 [file 97cd9fafe64685c291f4a1d2.xlsx]

## Sheet: GSE31568.top.table
ID	adj.P.Val	P.Value	t	B	logFC
hsa-miR-302b	2.19e-06	3.31e-08	-6.03108	8.58184	-3.6444
hsa-miR-1290	1.34e-07	4.66e-10	-6.96608	12.6794	-3.62242
hsa-miR-508-3p	2.58e-05	9.26e-07	-5.25946	5.39248	-3.32377
hsa-miR-126*	5.43e-06	1.13e-07	-5.75127	7.40167	-3.28998
hsa-miR-1258	0.000122	5.92e-06	-4.80634	3.62695	-3.0678
hsa-miR-609	0.000181	1e-05	-4.67379	3.12801	-3.00346
hsa-miR-302d	3.96e-05	1.67e-06	-5.11816	4.83249	-2.86326
hsa-miR-1468	0.000174	8.91e-06	-4.70328	3.23827	-2.7974
hsa-miR-190b	0.00096	7.68e-05	-4.13916	1.20587	-2.72287
hsa-miR-520c-3p	0.000777	5.58e-05	-4.22549	1.50588	-2.70583
hsa-miR-548j	0.000896	6.95e-05	-4.16612	1.29911	-2.68311
hsa-miR-204	0.000827	6.14e-05	-4.19988	1.41642	-2.67914
hsa-miR-376a*	0.00206	0.00021	-3.85983	0.26464	-2.63529
hsa-miR-375	0.00145	0.000131	-3.99272	0.70669	-2.55779
hsa-miR-135a	0.00113	9.57e-05	-4.0789	0.99895	-2.52481
hsa-let-7b*	0.00253	0.000313	-3.74485	-0.10916	-2.47967
hsa-miR-142-3p	0.00321	0.000439	-3.64667	-0.42177	-2.46877
hsa-miR-942	0.00337	0.000481	-3.61971	-0.50653	-2.4338
hsa-miR-382	0.00337	0.000485	-3.6168	-0.51565	-2.40268
hsa-miR-455-5p	0.0011	9.14e-05	-4.09156	1.04226	-2.37485
hsa-miR-373	0.00235	0.00028	-3.77728	-0.00457	-2.37417
hsa-miR-92a-1*	0.00385	0.000594	-3.55694	-0.70207	-2.36366
hsa-miR-98	0.00612	0.00109	-3.37145	-1.26461	-2.36131
hsa-miR-516a-3p	0.00231	0.000273	-3.78453	0.0189	-2.34866
hsa-miR-556-3p	0.00337	0.000482	-3.61867	-0.5098	-2.34846
hsa-miR-876-3p	0.00226	0.000242	-3.81909	0.13124	-2.34287
hsa-miR-613	0.00735	0.00142	-3.28894	-1.50737	-2.26662
hsa-miR-483-3p	0.00513	0.000844	-3.45054	-1.02758	-2.25846
hsa-miR-154	0.00337	0.000497	-3.61012	-0.53658	-2.24975
hsa-miR-1262	0.00302	0.000405	-3.67	-0.34805	-2.2276
hsa-miR-1250	0.00325	0.000448	-3.64032	-0.44177	-2.22742
hsa-miR-132*	0.00253	0.000311	-3.74682	-0.10282	-2.20818
hsa-miR-299-3p	0.00527	0.000886	-3.43595	-1.07162	-2.19538
hsa-miR-369-5p	0.00226	0.000245	-3.81537	0.11912	-2.1587
hsa-miR-26a-2*	0.00469	0.000734	-3.49299	-0.89863	-2.1459
hsa-miR-548d-5p	0.00708	0.00134	-3.30848	-1.4503	-2.14344
hsa-miR-892b	0.000839	6.32e-05	-4.192	1.38899	-2.12928
hsa-miR-924	0.00538	0.00091	-3.42769	-1.09649	-2.12354
hsa-miR-19b-2*	0.00871	0.00175	-3.22345	-1.69666	-2.07291
hsa-miR-548c-5p	0.0102	0.0021	-3.16513	-1.86266	-2.07032
hsa-miR-576-3p	0.00496	0.00081	-3.46329	-0.98899	-2.06066
hsa-miR-520a-3p	0.0101	0.00206	-3.1704	-1.84775	-2.03455
hsa-miR-920	0.00226	0.000248	-3.81218	0.10874	-2.0344
hsa-miR-629	0.026	0.00732	-2.74228	-2.99185	-2.00546
hsa-miR-1204	0.0153	0.00369	-2.97898	-2.37616	-1.99055
hsa-miR-578	0.0134	0.00311	-3.03634	-2.22062	-1.97923
hsa-miR-203	0.00585	0.00101	-3.39574	-1.19228	-1.97403
hsa-miR-601	0.0152	0.00365	-2.98269	-2.36618	-1.96228
hsa-miR-34a	0.00602	0.00105	-3.38463	-1.22541	-1.92897
hsa-miR-450a	0.0176	0.00442	-2.91818	-2.53835	-1.9214
hsa-miR-581	0.015	0.00357	-2.99046	-2.34523	-1.92064
hsa-miR-30e*	0.00382	0.000584	-3.56164	-0.68752	-1.86649
hsa-miR-644	0.0401	0.0127	-2.5408	-3.4818	-1.81301
hsa-let-7f-2*	0.0201	0.0053	-2.85555	-2.70252	-1.80843
hsa-miR-140-5p	0.0211	0.00565	-2.83348	-2.75968	-1.80492
hsa-let-7g	0.00474	0.000749	-3.48692	-0.91714	-1.80318
hsa-miR-453	0.0211	0.00564	-2.83425	-2.75767	-1.79555
hsa-miR-454*	0.0163	0.00397	-2.95488	-2.44077	-1.78861
hsa-miR-615-3p	0.0132	0.00302	-3.0463	-2.19339	-1.78206
hsa-miR-323-5p	0.0107	0.00225	-3.14285	-1.92544	-1.77549
hsa-miR-23b*	0.0124	0.00282	-3.06858	-2.13214	-1.75572
hsa-miR-147	0.017	0.0042	-2.93578	-2.49169	-1.7366
hsa-miR-340*	0.0266	0.00761	-2.72862	-3.02609	-1.71779
hsa-let-7e	0.0218	0.00588	-2.81993	-2.79458	-1.70906
hsa-miR-135b	0.0281	0.0083	-2.69773	-3.10293	-1.70668
hsa-miR-1303	0.0167	0.00408	-2.9451	-2.46689	-1.69085
hsa-miR-379	0.0429	0.0138	-2.51118	-3.5511	-1.68532
hsa-miR-29c*	0.0369	0.0113	-2.5841	-3.37922	-1.67429
hsa-miR-26b*	0.0369	0.0113	-2.58533	-3.37628	-1.66094
hsa-miR-149	0.0173	0.00432	-2.92605	-2.51751	-1.63647
hsa-miR-330-5p	0.022	0.00596	-2.81494	-2.80739	-1.62452
hsa-miR-522	0.0449	0.0148	-2.48419	-3.61365	-1.60087
hsa-miR-29b-2*	0.0108	0.00231	-3.13355	-1.95156	-1.59291
hsa-miR-760	0.0493	0.0166	-2.4391	-3.7168	-1.56924
hsa-miR-130b*	0.0445	0.0146	-2.4888	-3.60301	-1.5628
hsa-miR-521	0.00196	0.000195	-3.88021	0.33174	-1.55239
hsa-miR-1299	0.0499	0.0169	-2.43308	-3.73044	-1.54411
hsa-miR-27a	5.12e-05	2.26e-06	-5.04445	4.54365	-1.51756
hsa-miR-95	0.0442	0.0144	-2.49411	-3.59073	-1.50938
hsa-miR-506	0.0411	0.0131	2.53007	-3.50699	1.51482
hsa-miR-1537	0.0265	0.00756	2.73099	-3.02016	1.51863
hsa-miR-767-5p	8.73e-05	4.15e-06	4.89481	3.96456	1.52587
hsa-miR-1910	0.0274	0.00789	2.71567	-3.05838	1.52715
hsa-miR-1277	0.0121	0.00268	3.08518	-2.08631	1.53507
hsa-miR-455-3p	0.000223	1.29e-05	4.60874	2.88623	1.54322
hsa-miR-767-3p	0.0212	0.00571	2.83015	-2.76827	1.55444
hsa-miR-127-5p	0.0205	0.00543	2.84743	-2.72359	1.55465
hsa-miR-545	0.009	0.00183	3.20828	-1.74006	1.55647
hsa-miR-1270	0.0467	0.0156	2.46363	-3.66088	1.56303
hsa-miR-922	0.00658	0.00123	3.33368	-1.37633	1.61776
hsa-miR-20a*	0.00118	0.000101	4.06434	0.94927	1.63192
hsa-miR-744*	0.0139	0.00324	3.02244	-2.25853	1.64169
hsa-miR-182*	0.00302	0.000403	3.67145	-0.34344	1.64647
hsa-miR-450b-3p	0.0176	0.00449	2.91282	-2.55252	1.65912
hsa-miR-379*	0.00872	0.00177	3.22012	-1.70619	1.67583
hsa-miR-200a*	0.012	0.00263	3.09119	-2.06965	1.68246
hsa-miR-146a*	0.00477	0.000774	3.47715	-0.94688	1.6895
hsa-miR-409-5p	0.000752	5.06e-05	4.252	1.59881	1.70014
hsa-miR-548p	0.000632	4.1e-05	4.3077	1.79539	1.70437
hsa-miR-1305	0.000947	7.46e-05	4.1469	1.23257	1.72385
hsa-miR-573	0.00474	0.000757	3.48366	-0.92707	1.73355
hsa-miR-218-1*	0.00337	0.00048	3.62028	-0.50477	1.75317
hsa-miR-514	0.0134	0.0031	3.03737	-2.2178	1.75667
hsa-miR-136*	0.00658	0.00123	3.33345	-1.37701	1.76498
hsa-miR-380*	0.00174	0.000167	3.92402	0.47684	1.77288
hsa-miR-545*	0.011	0.00236	3.12673	-1.97064	1.78217
hsa-miR-510	0.00716	0.00136	3.30311	-1.46601	1.78294
hsa-let-7f-1*	0.018	0.00462	2.90304	-2.57831	1.78484
hsa-miR-363*	0.00275	0.000353	3.71011	-0.22047	1.79216
hsa-miR-33a	0.00226	0.000244	3.81727	0.12531	1.79818
hsa-miR-24-1*	0.00226	0.000249	3.81055	0.10343	1.79916
hsa-miR-639	0.00226	0.000254	3.80585	0.08812	1.8167
hsa-miR-21*	0.00185	0.00018	3.90291	0.40677	1.82472
hsa-miR-589	0.00147	0.000134	3.98559	0.6827	1.86742
hsa-miR-646	0.000264	1.59e-05	4.55614	2.69228	1.87575
hsa-miR-371-5p	0.0075	0.00148	3.27717	-1.54161	1.89488
hsa-miR-1297	0.00474	0.000758	3.48339	-0.9279	1.90274
hsa-miR-1302	0.0131	0.00298	3.05001	-2.1832	1.91445
hsa-miR-1912	2.19e-06	3.3e-08	6.03168	8.58441	1.91484
hsa-miR-508-5p	4.16e-06	7.71e-08	5.83928	7.77021	1.92289
hsa-miR-518d-3p	0.00165	0.000154	3.94724	0.55422	1.92869
hsa-miR-124	0.00229	0.000267	3.79078	0.03916	1.92925
hsa-miR-411	0.00337	0.000489	3.61462	-0.52251	1.93107
hsa-miR-556-5p	3.96e-05	1.7e-06	5.11344	4.81389	1.9391
hsa-miR-100*	0.000722	4.77e-05	4.26752	1.65341	1.94162
hsa-miR-541	0.000437	2.79e-05	4.4097	2.1597	1.94787
hsa-miR-512-5p	2.96e-05	1.1e-06	5.21881	5.23056	1.95157
hsa-miR-181a*	0.0014	0.000123	4.00992	0.76465	1.95649
hsa-miR-509-5p	0.00201	0.000202	3.87034	0.29921	1.96508
hsa-miR-634	0.000823	6.01e-05	4.20568	1.43667	1.96731
hsa-miR-302b*	0.00621	0.00113	3.36044	-1.29729	1.97836
hsa-miR-181c*	0.00226	0.000254	3.80587	0.08821	1.99599
hsa-miR-330-3p	4.73e-06	9.32e-08	5.79581	7.58786	2.01374
hsa-miR-492	0.00195	0.000192	3.88469	0.34651	2.02775
hsa-miR-519b-5p	2.29e-05	7.97e-07	5.29531	5.53588	2.04126
hsa-miR-208a	0.00229	0.000268	3.78986	0.0362	2.07339
hsa-miR-873	0.00275	0.000353	3.71029	-0.2199	2.08365
hsa-miR-200a	0.000181	1.01e-05	4.67274	3.12407	2.09904
hsa-miR-889	0.00226	0.000257	3.80191	0.07531	2.11858
hsa-miR-373*	0.00302	0.000406	3.66975	-0.34883	2.14088
hsa-miR-1256	0.000264	1.62e-05	4.55026	2.67068	2.15104
hsa-miR-934	3.81e-05	1.5e-06	5.14334	4.93165	2.18275
hsa-miR-513b	0.00134	0.000117	4.02456	0.81416	2.19358
hsa-miR-20b*	4.05e-06	7.04e-08	5.85992	7.857	2.20271
hsa-miR-188-5p	2.99e-05	1.15e-06	5.20859	5.18993	2.22723
hsa-miR-487b	1.08e-05	2.89e-07	5.53463	6.50575	2.22923
hsa-miR-933	0.00101	8.18e-05	4.12178	1.14597	2.24947
hsa-miR-450b-5p	1.25e-05	3.48e-07	5.49083	6.32661	2.25067
hsa-miR-938	1.89e-05	5.46e-07	5.38492	5.8965	2.40398
hsa-miR-155*	5.97e-05	2.77e-06	4.99471	4.35006	2.40878
hsa-miR-139-5p	6.69e-06	1.49e-07	5.68825	7.13939	2.40932
hsa-miR-217	6.69e-06	1.55e-07	5.67891	7.10062	2.42198
hsa-miR-526a	3.93e-05	1.59e-06	5.12899	4.8751	2.44806
hsa-miR-591	2.19e-06	3.26e-08	6.0341	8.59472	2.46345
hsa-miR-145*	0.000777	5.55e-05	4.22699	1.51111	2.46809
hsa-miR-520h	0.000388	2.43e-05	4.44574	2.28974	2.4776
hsa-miR-516a-5p	2.04e-05	6.43e-07	5.34646	5.74132	2.48146
hsa-miR-1245	0.000185	1.05e-05	4.66101	3.08034	2.48371
hsa-miR-616*	0.000174	9.08e-06	4.69875	3.2213	2.58413
hsa-miR-802	0.000181	9.82e-06	4.67883	3.1468	2.58926
hsa-miR-298	2.04e-05	6.61e-07	5.33959	5.71366	2.6596
hsa-miR-568	2.1e-05	7.05e-07	5.32457	5.65327	2.67044
hsa-miR-520d-5p	3.08e-06	4.99e-08	5.93798	8.18643	2.69493
hsa-miR-1291	3.21e-07	2.23e-09	6.62778	11.173	2.70428
hsa-miR-515-5p	3.9e-07	4.07e-09	6.49638	10.5946	2.70448
hsa-miR-1278	7.56e-07	8.76e-09	6.32749	9.85737	2.72815
hsa-miR-488*	3.59e-07	3.33e-09	6.53998	10.7861	2.82797
hsa-miR-566	3.59e-07	3.22e-09	6.54778	10.8204	2.91617
hsa-miR-10b*	6.77e-06	1.73e-07	5.65414	6.99795	2.92882
hsa-miR-491-3p	2.04e-05	6.32e-07	5.35038	5.7571	2.92979
hsa-miR-31*	8.67e-08	2.01e-10	7.14594	13.4893	2.94672
hsa-miR-1201	5.84e-05	2.64e-06	5.0061	4.39428	2.97091
hsa-miR-518a-3p	3.21e-07	2.07e-09	6.64402	11.2447	2.97144
hsa-miR-519e*	3.21e-07	1.92e-09	6.66054	11.3178	3.10991
hsa-miR-1283	8.15e-13	9.44e-16	9.69451	25.3133	4.10131
