# Supplementary material for: Construction of Potential miRNA-mRNA Regulatory Network in AMI Plasma by Bioinformatics Analysis
Source: Research Square preprint supplement (doi:10.21203/rs.3.rs-1250640/v1), 2022-01-17
Supplement: Supplementary file 4 [file aa4822a3cb0fa7c20317f800.xlsx]

## Sheet: 表4-miR-gene
ID	Gene
hsa-mir-142-3p	ACACA
hsa-mir-142-3p	AGTR2
hsa-mir-142-3p	AK4
hsa-mir-142-3p	ALAD
hsa-mir-142-3p	APC
hsa-mir-142-3p	XIAP
hsa-mir-142-3p	ARF4
hsa-mir-142-3p	ARNTL
hsa-mir-142-3p	ATP2A2
hsa-mir-142-3p	ATP2B1
hsa-mir-142-3p	AZF1
hsa-mir-142-3p	BACH1
hsa-mir-142-3p	BAK1
hsa-mir-142-3p	ZFP36L2
hsa-mir-142-3p	C2
hsa-mir-142-3p	C4BPB
hsa-mir-142-3p	CALM1
hsa-mir-142-3p	SERPINH1
hsa-mir-142-3p	CCNG1
hsa-mir-142-3p	CCNT2
hsa-mir-142-3p	ENTPD1
hsa-mir-142-3p	CDC6
hsa-mir-142-3p	CDC25C
hsa-mir-142-3p	CDKN1B
hsa-mir-142-3p	CLTA
hsa-mir-142-3p	CNN3
hsa-mir-142-3p	COPA
hsa-mir-142-3p	CPS1
hsa-mir-142-3p	CRH
hsa-mir-142-3p	CSNK1G3
hsa-mir-142-3p	CSRP2
hsa-mir-142-3p	CTNNB1
hsa-mir-142-3p	DAG1
hsa-mir-142-3p	ECT2
hsa-mir-142-3p	EGR2
hsa-mir-142-3p	EIF5
hsa-mir-142-3p	STX2
hsa-mir-142-3p	NR2F6
hsa-mir-142-3p	ESR1
hsa-mir-142-3p	EVI2B
hsa-mir-142-3p	ACSL1
hsa-mir-142-3p	ACSL4
hsa-mir-142-3p	GPC4
hsa-mir-142-3p	LRRC32
hsa-mir-142-3p	GFI1
hsa-mir-142-3p	GNAQ
hsa-mir-142-3p	GNAS
hsa-mir-142-3p	GNB2
hsa-mir-142-3p	GOLGA1
hsa-mir-142-3p	HMGB1
hsa-mir-142-3p	HMGA1
hsa-mir-142-3p	HOXA7
hsa-mir-142-3p	HOXA9
hsa-mir-142-3p	HOXA10
hsa-mir-142-3p	HOXA13
hsa-mir-142-3p	HSBP1
hsa-mir-142-3p	HSD17B4
hsa-mir-142-3p	HSPA1B
hsa-mir-142-3p	IFNAR2
hsa-mir-142-3p	CYR61
hsa-mir-142-3p	IL1A
hsa-mir-142-3p	IL6
hsa-mir-142-3p	IL6ST
hsa-mir-142-3p	INCENP
hsa-mir-142-3p	INPP5A
hsa-mir-142-3p	IRAK1
hsa-mir-142-3p	IRF1
hsa-mir-142-3p	ITGAV
hsa-mir-142-3p	KCND3
hsa-mir-142-3p	KIF5A
hsa-mir-142-3p	KIF5B
hsa-mir-142-3p	TNPO1
hsa-mir-142-3p	LAMC1
hsa-mir-142-3p	LOX
hsa-mir-142-3p	LPP
hsa-mir-142-3p	SH2D1A
hsa-mir-142-3p	MARCKS
hsa-mir-142-3p	MEF2D
hsa-mir-142-3p	ATXN3
hsa-mir-142-3p	MKLN1
hsa-mir-142-3p	KMT2A
hsa-mir-142-3p	AFF1
hsa-mir-142-3p	TRIM37
hsa-mir-142-3p	NAP1L2
hsa-mir-142-3p	NEFH
hsa-mir-142-3p	OSBP
hsa-mir-142-3p	SERPINA4
hsa-mir-142-3p	PIK3CG
hsa-mir-142-3p	PPP1R2
hsa-mir-142-3p	PPP2R2C
hsa-mir-142-3p	PRKCA
hsa-mir-142-3p	PSMB5
hsa-mir-142-3p	PSMD11
hsa-mir-142-3p	PSMD12
hsa-mir-142-3p	TWF1
hsa-mir-142-3p	PTPRJ
hsa-mir-142-3p	RAB2A
hsa-mir-142-3p	RGL2
hsa-mir-142-3p	RAC1
hsa-mir-142-3p	RAD51
hsa-mir-142-3p	RPE
hsa-mir-142-3p	RPS19
hsa-mir-142-3p	S100A11
hsa-mir-142-3p	VPS52
hsa-mir-142-3p	SCD
hsa-mir-142-3p	SKP2
hsa-mir-142-3p	TROVE2
hsa-mir-142-3p	SS18
hsa-mir-142-3p	SYPL1
hsa-mir-142-3p	SYT4
hsa-mir-142-3p	TGFBR1
hsa-mir-142-3p	THBS4
hsa-mir-142-3p	TSPAN6
hsa-mir-142-3p	NR2C1
hsa-mir-142-3p	TSPYL1
hsa-mir-142-3p	UGT2B17
hsa-mir-142-3p	UCK2
hsa-mir-142-3p	NSD2
hsa-mir-142-3p	XRCC1
hsa-mir-142-3p	YES1
hsa-mir-142-3p	YWHAE
hsa-mir-142-3p	YWHAH
hsa-mir-142-3p	ZFX
hsa-mir-142-3p	ZNF24
hsa-mir-142-3p	ZNF217
hsa-mir-142-3p	ZNF236
hsa-mir-142-3p	BTG2
hsa-mir-142-3p	DDX39B
hsa-mir-142-3p	DGS2
hsa-mir-142-3p	STAM
hsa-mir-142-3p	CCDC6
hsa-mir-142-3p	CUL5
hsa-mir-142-3p	HMGA2
hsa-mir-142-3p	FZD7
hsa-mir-142-3p	HIST1H4D
hsa-mir-142-3p	NCK2
hsa-mir-142-3p	DYRK3
hsa-mir-142-3p	RGS5
hsa-mir-142-3p	PPFIA1
hsa-mir-142-3p	LGR5
hsa-mir-142-3p	CDC14B
hsa-mir-142-3p	TNKS
hsa-mir-142-3p	PROM1
hsa-mir-142-3p	KAT2B
hsa-mir-142-3p	RTL8C
hsa-mir-142-3p	CHRNA6
hsa-mir-142-3p	WASL
hsa-mir-142-3p	CLDN12
hsa-mir-142-3p	HGS
hsa-mir-142-3p	VAPB
hsa-mir-142-3p	SOCS6
hsa-mir-142-3p	ZNF264
hsa-mir-142-3p	ABCG2
hsa-mir-142-3p	ROCK2
hsa-mir-142-3p	TBX4
hsa-mir-142-3p	SCAMP1
hsa-mir-142-3p	TMEM59
hsa-mir-142-3p	CLOCK
hsa-mir-142-3p	MORF4L2
hsa-mir-142-3p	MTFR1
hsa-mir-142-3p	SOCS5
hsa-mir-142-3p	PUM1
hsa-mir-142-3p	USP6NL
hsa-mir-142-3p	BCLAF1
hsa-mir-142-3p	KIAA0232
hsa-mir-142-3p	IP6K1
hsa-mir-142-3p	EPM2AIP1
hsa-mir-142-3p	GOLGA5
hsa-mir-142-3p	PARP2
hsa-mir-142-3p	DNAJB6
hsa-mir-142-3p	ABCC9
hsa-mir-142-3p	SLC25A13
hsa-mir-142-3p	STX6
hsa-mir-142-3p	CALCOCO2
hsa-mir-142-3p	TFG
hsa-mir-142-3p	SEC23A
hsa-mir-142-3p	DDX17
hsa-mir-142-3p	NCKAP1
hsa-mir-142-3p	ZNF460
hsa-mir-142-3p	SDCCAG3
hsa-mir-142-3p	FRS2
hsa-mir-142-3p	MALT1
hsa-mir-142-3p	MAN1A2
hsa-mir-142-3p	MORF4L1
hsa-mir-142-3p	PAPD7
hsa-mir-142-3p	DNAJB4
hsa-mir-142-3p	SLC7A9
hsa-mir-142-3p	KAT7
hsa-mir-142-3p	FICD
hsa-mir-142-3p	POLI
hsa-mir-142-3p	CA5B
hsa-mir-142-3p	MGLL
hsa-mir-142-3p	ATF5
hsa-mir-142-3p	COPG1
hsa-mir-142-3p	FNDC3A
hsa-mir-142-3p	INPP5F
hsa-mir-142-3p	MON1B
hsa-mir-142-3p	ELL2
hsa-mir-142-3p	SMG1
hsa-mir-142-3p	CLUAP1
hsa-mir-142-3p	TAB2
hsa-mir-142-3p	GPD1L
hsa-mir-142-3p	ZCCHC14
hsa-mir-142-3p	DIP2A
hsa-mir-142-3p	PSME4
hsa-mir-142-3p	SIK2
hsa-mir-142-3p	U2SURP
hsa-mir-142-3p	MMD
hsa-mir-142-3p	ZMYND8
hsa-mir-142-3p	SLC7A11
hsa-mir-142-3p	TMEM245
hsa-mir-142-3p	MTCH1
hsa-mir-142-3p	CBY1
hsa-mir-142-3p	TPSG1
hsa-mir-142-3p	HECTD1
hsa-mir-142-3p	DCAF12
hsa-mir-142-3p	ZNF473
hsa-mir-142-3p	INTS7
hsa-mir-142-3p	PTPN23
hsa-mir-142-3p	CLIC4
hsa-mir-142-3p	FAM98A
hsa-mir-142-3p	KBTBD2
hsa-mir-142-3p	TIPARP
hsa-mir-142-3p	GLCE
hsa-mir-142-3p	RTL8A
hsa-mir-142-3p	IRF2BP1
hsa-mir-142-3p	PITPNC1
hsa-mir-142-3p	FBXO3
hsa-mir-142-3p	SLC17A5
hsa-mir-142-3p	AFF4
hsa-mir-142-3p	RAB30
hsa-mir-142-3p	EML4
hsa-mir-142-3p	FLVCR1
hsa-mir-142-3p	CNIH4
hsa-mir-142-3p	EEF2K
hsa-mir-142-3p	STRN3
hsa-mir-142-3p	RRM2B
hsa-mir-142-3p	TAS2R7
hsa-mir-142-3p	TMED7
hsa-mir-142-3p	GOLT1B
hsa-mir-142-3p	INSIG2
hsa-mir-142-3p	HSD17B12
hsa-mir-142-3p	DCTN4
hsa-mir-142-3p	SUCO
hsa-mir-142-3p	GINS2
hsa-mir-142-3p	RBM27
hsa-mir-142-3p	CCNJ
hsa-mir-142-3p	ARL15
hsa-mir-142-3p	TBC1D13
hsa-mir-142-3p	OTUD4
hsa-mir-142-3p	RAB39A
hsa-mir-142-3p	FAM208B
hsa-mir-142-3p	SLC35F6
hsa-mir-142-3p	FKBP14
hsa-mir-142-3p	CDCA4
hsa-mir-142-3p	ATG16L1
hsa-mir-142-3p	PRPF38B
hsa-mir-142-3p	AKIRIN2
hsa-mir-142-3p	CEP192
hsa-mir-142-3p	ETNK2
hsa-mir-142-3p	PCMTD2
hsa-mir-142-3p	UBE2W
hsa-mir-142-3p	SLC39A9
hsa-mir-142-3p	STRBP
hsa-mir-142-3p	LRRC59
hsa-mir-142-3p	YOD1
hsa-mir-142-3p	TRIM36
hsa-mir-142-3p	DOCK10
hsa-mir-142-3p	DEPDC1
hsa-mir-142-3p	PEX26
hsa-mir-142-3p	SLC30A6
hsa-mir-142-3p	BTBD7
hsa-mir-142-3p	FAM222B
hsa-mir-142-3p	ENAH
hsa-mir-142-3p	ZNF701
hsa-mir-142-3p	NSFL1C
hsa-mir-142-3p	PCDHGA10
hsa-mir-142-3p	PCDHGA2
hsa-mir-142-3p	PCDHB14
hsa-mir-142-3p	RNF20
hsa-mir-142-3p	C11orf16
hsa-mir-142-3p	PNO1
hsa-mir-142-3p	AKR1B10
hsa-mir-142-3p	TWSG1
hsa-mir-142-3p	PDSS2
hsa-mir-142-3p	LYRM4
hsa-mir-142-3p	SCYL3
hsa-mir-142-3p	KIAA1191
hsa-mir-142-3p	ZNF608
hsa-mir-142-3p	MTUS1
hsa-mir-142-3p	TAOK1
hsa-mir-142-3p	DOCK6
hsa-mir-142-3p	PHF12
hsa-mir-142-3p	USP37
hsa-mir-142-3p	ZNF529
hsa-mir-142-3p	WIZ
hsa-mir-142-3p	MANBAL
hsa-mir-142-3p	ACBD3
hsa-mir-142-3p	CREB3L2
hsa-mir-142-3p	MTMR9
hsa-mir-142-3p	TSEN34
hsa-mir-142-3p	SECISBP2
hsa-mir-142-3p	ATG9A
hsa-mir-142-3p	FYCO1
hsa-mir-142-3p	RIPOR1
hsa-mir-142-3p	PANK3
hsa-mir-142-3p	AGBL2
hsa-mir-142-3p	TUBAL3
hsa-mir-142-3p	TNIP3
hsa-mir-142-3p	SLC35E1
hsa-mir-142-3p	SLC35F5
hsa-mir-142-3p	C16orf70
hsa-mir-142-3p	EDEM3
hsa-mir-142-3p	KLHL15
hsa-mir-142-3p	PPP1R14C
hsa-mir-142-3p	RNF170
hsa-mir-142-3p	NBPF3
hsa-mir-142-3p	SLC37A3
hsa-mir-142-3p	BRMS1L
hsa-mir-142-3p	AKT1S1
hsa-mir-142-3p	TMEM101
hsa-mir-142-3p	MSANTD4
hsa-mir-142-3p	LCOR
hsa-mir-142-3p	TNRC18
hsa-mir-142-3p	SPPL2A
hsa-mir-142-3p	TBRG1
hsa-mir-142-3p	NFATC2IP
hsa-mir-142-3p	PPP1R15B
hsa-mir-142-3p	TMEM209
hsa-mir-142-3p	KRTAP4-5
hsa-mir-142-3p	PPIL4
hsa-mir-142-3p	SIGLEC10
hsa-mir-142-3p	MCFD2
hsa-mir-142-3p	ZNF682
hsa-mir-142-3p	BOD1
hsa-mir-142-3p	ACBD5
hsa-mir-142-3p	TIFA
hsa-mir-142-3p	DTD1
hsa-mir-142-3p	MMGT1
hsa-mir-142-3p	MRFAP1
hsa-mir-142-3p	ARHGAP12
hsa-mir-142-3p	ADPRHL1
hsa-mir-142-3p	MBD6
hsa-mir-142-3p	KCTD12
hsa-mir-142-3p	PSTK
hsa-mir-142-3p	C11orf74
hsa-mir-142-3p	ARL14EP
hsa-mir-142-3p	SPPL3
hsa-mir-142-3p	WHAMM
hsa-mir-142-3p	SNTN
hsa-mir-142-3p	CPEB2
hsa-mir-142-3p	C5orf24
hsa-mir-142-3p	MPLKIP
hsa-mir-142-3p	C7orf31
hsa-mir-142-3p	EIF5AL1
hsa-mir-142-3p	MESP2
hsa-mir-142-3p	C18orf25
hsa-mir-142-3p	SIK1
hsa-mir-142-3p	ARL6IP6
hsa-mir-142-3p	RNF38
hsa-mir-142-3p	FREM1
hsa-mir-142-3p	HSFY2
hsa-mir-142-3p	TMTC3
hsa-mir-142-3p	ZFPM1
hsa-mir-142-3p	ZNF676
hsa-mir-142-3p	TOR1AIP2
hsa-mir-142-3p	FAM209A
hsa-mir-142-3p	TET3
hsa-mir-142-3p	C9orf72
hsa-mir-142-3p	TMEM136
hsa-mir-142-3p	ARL5B
hsa-mir-142-3p	TMED4
hsa-mir-142-3p	RICTOR
hsa-mir-142-3p	IPMK
hsa-mir-142-3p	NUDT8
hsa-mir-142-3p	MFSD8
hsa-mir-142-3p	SGMS1
hsa-mir-142-3p	MRGPRX1
hsa-mir-142-3p	FAM177A1
hsa-mir-142-3p	ARL10
hsa-mir-142-3p	DPY19L4
hsa-mir-142-3p	CLEC4D
hsa-mir-142-3p	ZNF678
hsa-mir-142-3p	VSIG1
hsa-mir-142-3p	BMP8A
hsa-mir-142-3p	MROH7
hsa-mir-142-3p	SRRD
hsa-mir-142-3p	H3F3C
hsa-mir-142-3p	LINC00598
hsa-mir-375	PARP1
hsa-mir-375	JAG1
hsa-mir-375	BIRC3
hsa-mir-375	XIAP
hsa-mir-375	RHOA
hsa-mir-375	ARHGDIA
hsa-mir-375	AXL
hsa-mir-375	BAK1
hsa-mir-375	BCL2
hsa-mir-375	ZFP36L2
hsa-mir-375	C1QBP
hsa-mir-375	CALU
hsa-mir-375	CASP3
hsa-mir-375	RUNX3
hsa-mir-375	CDC42
hsa-mir-375	CDKN2B
hsa-mir-375	CDR2
hsa-mir-375	CENPF
hsa-mir-375	CFL2
hsa-mir-375	CTSC
hsa-mir-375	CHGB
hsa-mir-375	CNN3
hsa-mir-375	COL12A1
hsa-mir-375	MAP3K8
hsa-mir-375	CPOX
hsa-mir-375	CRABP2
hsa-mir-375	CSTF2
hsa-mir-375	CTGF
hsa-mir-375	CTNNB1
hsa-mir-375	CXADR
hsa-mir-375	TIMM8A
hsa-mir-375	DLG4
hsa-mir-375	DNMT3B
hsa-mir-375	DPYSL3
hsa-mir-375	DR1
hsa-mir-375	DUSP6
hsa-mir-375	DUT
hsa-mir-375	EFNB2
hsa-mir-375	EIF2S1
hsa-mir-375	EIF4EBP2
hsa-mir-375	ELAVL2
hsa-mir-375	ELAVL4
hsa-mir-375	EMP1
hsa-mir-375	ERBB2
hsa-mir-375	EXT1
hsa-mir-375	F3
hsa-mir-375	ACSL3
hsa-mir-375	ACSL4
hsa-mir-375	FAH
hsa-mir-375	FKBP1A
hsa-mir-375	FKBP1B
hsa-mir-375	FOLR1
hsa-mir-375	KDSR
hsa-mir-375	IFI6
hsa-mir-375	GAS8
hsa-mir-375	GATA6
hsa-mir-375	GOLGA4
hsa-mir-375	RAPGEF1
hsa-mir-375	HK2
hsa-mir-375	MR1
hsa-mir-375	HOXB3
hsa-mir-375	HSP90AA1
hsa-mir-375	NDST1
hsa-mir-375	SP110
hsa-mir-375	IFIT1
hsa-mir-375	IGF1R
hsa-mir-375	IGFBP3
hsa-mir-375	RBPJ
hsa-mir-375	IL1RAP
hsa-mir-375	ITGB1
hsa-mir-375	ITIH4
hsa-mir-375	JAK2
hsa-mir-375	KCNN4
hsa-mir-375	KCNQ2
hsa-mir-375	KHK
hsa-mir-375	KPNA4
hsa-mir-375	KRT8
hsa-mir-375	LDHB
hsa-mir-375	LRP5
hsa-mir-375	MRE11
hsa-mir-375	MST1R
hsa-mir-375	MYBL1
hsa-mir-375	MYC
hsa-mir-375	MYCN
hsa-mir-375	NCAM1
hsa-mir-375	NPPB
hsa-mir-375	ODF2
hsa-mir-375	OPA1
hsa-mir-375	OTX1
hsa-mir-375	PEBP1
hsa-mir-375	PAFAH1B1
hsa-mir-375	PAFAH2
hsa-mir-375	PRDX1
hsa-mir-375	PDK1
hsa-mir-375	PIK3CA
hsa-mir-375	PLAG1
hsa-mir-375	PPP1R2
hsa-mir-375	PRKCA
hsa-mir-375	MAPK3
hsa-mir-375	EIF2AK2
hsa-mir-375	PRKX
hsa-mir-375	KLK10
hsa-mir-375	PTPN1
hsa-mir-375	PTPN12
hsa-mir-375	RAB3B
hsa-mir-375	RAB6A
hsa-mir-375	RBBP8
hsa-mir-375	RCN2
hsa-mir-375	RLF
hsa-mir-375	RPGR
hsa-mir-375	RPN1
hsa-mir-375	RPN2
hsa-mir-375	RTN2
hsa-mir-375	SDC1
hsa-mir-375	MAP2K4
hsa-mir-375	SET
hsa-mir-375	SLC6A6
hsa-mir-375	SLC7A1
hsa-mir-375	SNAPC1
hsa-mir-375	SNRPA1
hsa-mir-375	SON
hsa-mir-375	SOX2
hsa-mir-375	SP1
hsa-mir-375	STAT3
hsa-mir-375	STX3
hsa-mir-375	TAF2
hsa-mir-375	TCF12
hsa-mir-375	TFRC
hsa-mir-375	TGFB2
hsa-mir-375	TGM2
hsa-mir-375	THRA
hsa-mir-375	TNNI3
hsa-mir-375	TNS1
hsa-mir-375	TP53
hsa-mir-375	TPR
hsa-mir-375	TRPS1
hsa-mir-375	UBE3A
hsa-mir-375	UCHL3
hsa-mir-375	UGCG
hsa-mir-375	USP1
hsa-mir-375	YWHAZ
hsa-mir-375	ALMS1
hsa-mir-375	REEP5
hsa-mir-375	DEK
hsa-mir-375	CUL5
hsa-mir-375	PTP4A2
hsa-mir-375	PUDP
hsa-mir-375	FZD4
hsa-mir-375	FZD8
hsa-mir-375	SPOP
hsa-mir-375	EEA1
hsa-mir-375	DGKD
hsa-mir-375	AP3B1
hsa-mir-375	NUMB
hsa-mir-375	EIF4G3
hsa-mir-375	DNAH11
hsa-mir-375	B3GALNT1
hsa-mir-375	TNFSF13
hsa-mir-375	PEX11B
hsa-mir-375	ASAP2
hsa-mir-375	BCL10
hsa-mir-375	BSN
hsa-mir-375	MBD2
hsa-mir-375	SPAG9
hsa-mir-375	SLC7A6
hsa-mir-375	CLDN1
hsa-mir-375	TBX19
hsa-mir-375	USP10
hsa-mir-375	EXO1
hsa-mir-375	EBAG9
hsa-mir-375	ZBED1
hsa-mir-375	XPR1
hsa-mir-375	NOLC1
hsa-mir-375	CRLF1
hsa-mir-375	KLF4
hsa-mir-375	EFTUD2
hsa-mir-375	RAB28
hsa-mir-375	HOMER2
hsa-mir-375	AKAP7
hsa-mir-375	PIGB
hsa-mir-375	LITAF
hsa-mir-375	RAB3D
hsa-mir-375	WTAP
hsa-mir-375	SEC24C
hsa-mir-375	VGLL4
hsa-mir-375	HERPUD1
hsa-mir-375	PHACTR2
hsa-mir-375	SNPH
hsa-mir-375	MLEC
hsa-mir-375	KIAA0513
hsa-mir-375	KIAA0232
hsa-mir-375	TBC1D5
hsa-mir-375	RIMS3
hsa-mir-375	SERTAD2
hsa-mir-375	DAZAP2
hsa-mir-375	NUP58
hsa-mir-375	TSC22D2
hsa-mir-375	RB1CC1
hsa-mir-375	ARHGAP11A
hsa-mir-375	TRIM66
hsa-mir-375	WDR1
hsa-mir-375	AMMECR1
hsa-mir-375	BCL2L11
hsa-mir-375	CTDSP2
hsa-mir-375	ABI2
hsa-mir-375	SLC25A15
hsa-mir-375	LHFPL2
hsa-mir-375	STX6
hsa-mir-375	GPHN
hsa-mir-375	RIDA
hsa-mir-375	FSTL3
hsa-mir-375	BCAS2
hsa-mir-375	RRAGB
hsa-mir-375	YAP1
hsa-mir-375	TIMM17A
hsa-mir-375	FAM3C
hsa-mir-375	HOXB13
hsa-mir-375	SEC23A
hsa-mir-375	CREB3
hsa-mir-375	SYNCRIP
hsa-mir-375	UNC13B
hsa-mir-375	SEMA3C
hsa-mir-375	ATG7
hsa-mir-375	PROCR
hsa-mir-375	CELF2
hsa-mir-375	AHCYL1
hsa-mir-375	SEC24A
hsa-mir-375	SDCCAG3
hsa-mir-375	RAB10
hsa-mir-375	SUB1
hsa-mir-375	PRDX3
hsa-mir-375	LMAN2
hsa-mir-375	NUDT21
hsa-mir-375	PSIP1
hsa-mir-375	BAZ1A
hsa-mir-375	RASSF8
hsa-mir-375	CBX3
hsa-mir-375	COG2
hsa-mir-375	PHLDA1
hsa-mir-375	DNAJC8
hsa-mir-375	CHSY1
hsa-mir-375	CARD8
hsa-mir-375	ELL2
hsa-mir-375	SLC4A1AP
hsa-mir-375	NT5C2
hsa-mir-375	DIP2C
hsa-mir-375	STK38L
hsa-mir-375	SAMD4A
hsa-mir-375	ERP44
hsa-mir-375	SIPA1L3
hsa-mir-375	DCUN1D4
hsa-mir-375	PSME4
hsa-mir-375	PHLPP1
hsa-mir-375	WWC1
hsa-mir-375	AGTPBP1
hsa-mir-375	IQCE
hsa-mir-375	ICOSLG
hsa-mir-375	RPGRIP1L
hsa-mir-375	DPY19L1
hsa-mir-375	RHOQ
hsa-mir-375	SLC35A3
hsa-mir-375	HEY1
hsa-mir-375	PHF3
hsa-mir-375	LEPROTL1
hsa-mir-375	SUZ12
hsa-mir-375	TNPO3
hsa-mir-375	GTPBP4
hsa-mir-375	ARL2BP
hsa-mir-375	CORO1C
hsa-mir-375	MKRN1
hsa-mir-375	SH3BP4
hsa-mir-375	IL17RA
hsa-mir-375	FBXO8
hsa-mir-375	CKAP2
hsa-mir-375	DNAJC2
hsa-mir-375	ANKRD1
hsa-mir-375	SERP1
hsa-mir-375	SESN1
hsa-mir-375	DESI1
hsa-mir-375	MAT2B
hsa-mir-375	C11orf54
hsa-mir-375	CCDC59
hsa-mir-375	SENP1
hsa-mir-375	NRBP1
hsa-mir-375	TMED5
hsa-mir-375	PHF20L1
hsa-mir-375	RDH11
hsa-mir-375	INSIG2
hsa-mir-375	JPT1
hsa-mir-375	NAGPA
hsa-mir-375	NIN
hsa-mir-375	CRIM1
hsa-mir-375	ZNF571
hsa-mir-375	CRLF3
hsa-mir-375	NELFCD
hsa-mir-375	SCLY
hsa-mir-375	RASD1
hsa-mir-375	CAB39
hsa-mir-375	NUP54
hsa-mir-375	GDAP1
hsa-mir-375	NLE1
hsa-mir-375	TMX3
hsa-mir-375	EXOC6
hsa-mir-375	MINDY2
hsa-mir-375	TMEM106B
hsa-mir-375	NCAPG2
hsa-mir-375	NSD3
hsa-mir-375	PPP2R3C
hsa-mir-375	RMDN3
hsa-mir-375	APPL2
hsa-mir-375	NAT10
hsa-mir-375	OGFOD1
hsa-mir-375	YY1AP1
hsa-mir-375	PGM2
hsa-mir-375	TMEM74B
hsa-mir-375	AGPAT5
hsa-mir-375	MNS1
hsa-mir-375	STRBP
hsa-mir-375	PIP4P2
hsa-mir-375	CDCA7L
hsa-mir-375	VEZT
hsa-mir-375	STAP2
hsa-mir-375	G2E3
hsa-mir-375	MREG
hsa-mir-375	CCDC88A
hsa-mir-375	ENAH
hsa-mir-375	METTL2B
hsa-mir-375	EMC3
hsa-mir-375	CMAS
hsa-mir-375	NXT2
hsa-mir-375	NSFL1C
hsa-mir-375	KLHL7
hsa-mir-375	PDGFC
hsa-mir-375	ZC3HAV1
hsa-mir-375	BDH2
hsa-mir-375	IFT46
hsa-mir-375	C1GALT1
hsa-mir-375	ARNTL2
hsa-mir-375	CHPT1
hsa-mir-375	PHTF2
hsa-mir-375	KIAA1191
hsa-mir-375	PBXIP1
hsa-mir-375	CYP20A1
hsa-mir-375	USP31
hsa-mir-375	NUFIP2
hsa-mir-375	IFT80
hsa-mir-375	CIP2A
hsa-mir-375	GATAD1
hsa-mir-375	RAP2C
hsa-mir-375	ENOPH1
hsa-mir-375	ABHD4
hsa-mir-375	RRAGC
hsa-mir-375	AZI2
hsa-mir-375	MPP5
hsa-mir-375	MOSPD3
hsa-mir-375	TNS3
hsa-mir-375	DEPTOR
hsa-mir-375	USP46
hsa-mir-375	PLEKHA3
hsa-mir-375	MAPKAP1
hsa-mir-375	CHPF
hsa-mir-375	ADIPOR2
hsa-mir-375	PPCS
hsa-mir-375	BBS10
hsa-mir-375	ZDHHC11
hsa-mir-375	LPCAT1
hsa-mir-375	WWC2
hsa-mir-375	DGLUCY
hsa-mir-375	GPR157
hsa-mir-375	ZNF614
hsa-mir-375	UXS1
hsa-mir-375	GKAP1
hsa-mir-375	CEP70
hsa-mir-375	LIMD2
hsa-mir-375	CEP44
hsa-mir-375	ZFP91
hsa-mir-375	SETD7
hsa-mir-375	NETO2
hsa-mir-375	APH1B
hsa-mir-375	SYT15
hsa-mir-375	TAF3
hsa-mir-375	SNX25
hsa-mir-375	KCTD10
hsa-mir-375	FAM96A
hsa-mir-375	FYTTD1
hsa-mir-375	CCDC115
hsa-mir-375	PCGF5
hsa-mir-375	GFM2
hsa-mir-375	MAP3K21
hsa-mir-375	DCTN5
hsa-mir-375	C15orf41
hsa-mir-375	EBPL
hsa-mir-375	TMEM25
hsa-mir-375	RPUSD4
hsa-mir-375	TMTC4
hsa-mir-375	SLC35B4
hsa-mir-375	ATOH8
hsa-mir-375	CEP19
hsa-mir-375	PAQR8
hsa-mir-375	ZFHX2
hsa-mir-375	DISP2
hsa-mir-375	CCDC32
hsa-mir-375	STPG1
hsa-mir-375	ZNF799
hsa-mir-375	C12orf29
hsa-mir-375	OXNAD1
hsa-mir-375	MTDH
hsa-mir-375	TRMT10A
hsa-mir-375	MED8
hsa-mir-375	CYP2U1
hsa-mir-375	PIK3IP1
hsa-mir-375	MAL2
hsa-mir-375	OSBPL8
hsa-mir-375	PTPMT1
hsa-mir-375	VASN
hsa-mir-375	BATF2
hsa-mir-375	NUS1
hsa-mir-375	COX20
hsa-mir-375	AEBP2
hsa-mir-375	TMEM170A
hsa-mir-375	LSM12
hsa-mir-375	TPRG1L
hsa-mir-375	GALM
hsa-mir-375	GRPEL2
hsa-mir-375	UBLCP1
hsa-mir-375	ADAT2
hsa-mir-375	NCOA7
hsa-mir-375	MTPN
hsa-mir-375	WFDC6
hsa-mir-375	GSC
hsa-mir-375	CEP128
hsa-mir-375	TTC7B
hsa-mir-375	CMTM4
hsa-mir-375	ZNF785
hsa-mir-375	SAMD11
hsa-mir-375	CBWD2
hsa-mir-375	SGO2
hsa-mir-375	SH3D19
hsa-mir-375	VPS37D
hsa-mir-375	ANKRD46
hsa-mir-375	SPRED1
hsa-mir-375	ZNF540
hsa-mir-375	TOR1AIP2
hsa-mir-375	SGMS2
hsa-mir-375	PAPD4
hsa-mir-375	KLHDC8B
hsa-mir-375	SLC39A11
hsa-mir-375	REEP3
hsa-mir-375	UBN2
hsa-mir-375	BOD1L1
hsa-mir-375	AQP11
hsa-mir-375	POC1B
hsa-mir-375	CCDC88B
hsa-mir-375	TMED8
hsa-mir-375	TMEM145
hsa-mir-375	LYPD5
hsa-mir-375	SLC25A42
hsa-mir-375	FAM126B
hsa-mir-375	PRRT3
hsa-mir-375	DOK7
hsa-mir-375	FAM200B
hsa-mir-375	CEP57L1
hsa-mir-375	METTL2A
hsa-mir-375	ESPNL
hsa-mir-375	ZNF404
hsa-mir-375	SOX2-OT
hsa-mir-375	SKA2
hsa-mir-375	SFT2D2
hsa-mir-375	FAM89A
hsa-mir-375	MALAT1
hsa-mir-375	KMT5A
hsa-mir-375	ZNF470
hsa-mir-375	MIR17HG
hsa-mir-375	IDNK
hsa-mir-375	CBWD3
hsa-mir-375	ZBTB8A
hsa-mir-375	FAM196B
hsa-mir-578	SERPINC1
hsa-mir-578	BRCA2
hsa-mir-578	CDH7
hsa-mir-578	CDKN1A
hsa-mir-578	CLCN6
hsa-mir-578	COL19A1
hsa-mir-578	CPOX
hsa-mir-578	CREB1
hsa-mir-578	VCAN
hsa-mir-578	ELAVL4
hsa-mir-578	EPHB1
hsa-mir-578	ACSL4
hsa-mir-578	FUT6
hsa-mir-578	GM2A
hsa-mir-578	HINT1
hsa-mir-578	HNRNPU
hsa-mir-578	IFIT1
hsa-mir-578	KCNJ10
hsa-mir-578	LIPA
hsa-mir-578	NHS
hsa-mir-578	PLSCR1
hsa-mir-578	PPP3R1
hsa-mir-578	PRKAA2
hsa-mir-578	PRKAB1
hsa-mir-578	TMPRSS15
hsa-mir-578	PSG4
hsa-mir-578	PURB
hsa-mir-578	RARB
hsa-mir-578	RFX1
hsa-mir-578	RPS27A
hsa-mir-578	CXCL5
hsa-mir-578	AURKA
hsa-mir-578	TACR3
hsa-mir-578	THBD
hsa-mir-578	TPI1
hsa-mir-578	WNT5A
hsa-mir-578	ZNF37A
hsa-mir-578	ZNF90
hsa-mir-578	KCNAB1
hsa-mir-578	STAM
hsa-mir-578	STK24
hsa-mir-578	RGS5
hsa-mir-578	STC2
hsa-mir-578	SPAG9
hsa-mir-578	DLGAP2
hsa-mir-578	TBX4
hsa-mir-578	SOCS5
hsa-mir-578	G3BP2
hsa-mir-578	FAM20B
hsa-mir-578	ZBTB40
hsa-mir-578	FEM1B
hsa-mir-578	RBM7
hsa-mir-578	PATJ
hsa-mir-578	SMNDC1
hsa-mir-578	CITED2
hsa-mir-578	DLC1
hsa-mir-578	PGRMC2
hsa-mir-578	LYPLA1
hsa-mir-578	KIF1C
hsa-mir-578	PNRC1
hsa-mir-578	EBNA1BP2
hsa-mir-578	YWHAQ
hsa-mir-578	PAPD7
hsa-mir-578	TPPP
hsa-mir-578	SEC63
hsa-mir-578	OIP5
hsa-mir-578	HABP4
hsa-mir-578	GOLGA8A
hsa-mir-578	FRMD4B
hsa-mir-578	PPIP5K2
hsa-mir-578	MGRN1
hsa-mir-578	DNAJC16
hsa-mir-578	RRP8
hsa-mir-578	LEPROTL1
hsa-mir-578	LRRC8B
hsa-mir-578	LSM5
hsa-mir-578	AAR2
hsa-mir-578	UBXN7
hsa-mir-578	ZBTB20
hsa-mir-578	TIMM8B
hsa-mir-578	FOXP1
hsa-mir-578	AGO2
hsa-mir-578	RBMS3
hsa-mir-578	RABGEF1
hsa-mir-578	MCTS1
hsa-mir-578	TMOD2
hsa-mir-578	OLA1
hsa-mir-578	NAA20
hsa-mir-578	ZDHHC2
hsa-mir-578	ZNF117
hsa-mir-578	AZIN1
hsa-mir-578	TRIM33
hsa-mir-578	TM6SF1
hsa-mir-578	PXK
hsa-mir-578	TMEM70
hsa-mir-578	MSL2
hsa-mir-578	TMEM100
hsa-mir-578	ZNF654
hsa-mir-578	GALNT10
hsa-mir-578	LUC7L
hsa-mir-578	EIF5A2
hsa-mir-578	C5orf15
hsa-mir-578	TULP4
hsa-mir-578	PELI1
hsa-mir-578	ARID1B
hsa-mir-578	TAOK1
hsa-mir-578	NYAP2
hsa-mir-578	GPR107
hsa-mir-578	SRPRB
hsa-mir-578	CACNG8
hsa-mir-578	AFAP1
hsa-mir-578	AZI2
hsa-mir-578	ZMAT3
hsa-mir-578	FYCO1
hsa-mir-578	NDNF
hsa-mir-578	PANK3
hsa-mir-578	TMC7
hsa-mir-578	POF1B
hsa-mir-578	CXXC4
hsa-mir-578	STARD5
hsa-mir-578	SLC25A32
hsa-mir-578	SLC38A1
hsa-mir-578	KCNK16
hsa-mir-578	RASSF4
hsa-mir-578	HOOK3
hsa-mir-578	HIST1H2BK
hsa-mir-578	MIDN
hsa-mir-578	STPG1
hsa-mir-578	SNAP47
hsa-mir-578	GSTO2
hsa-mir-578	ATP6V1G3
hsa-mir-578	FAM168B
hsa-mir-578	PRRC1
hsa-mir-578	KLHL23
hsa-mir-578	AWAT2
hsa-mir-578	DOK6
hsa-mir-578	CADM2
hsa-mir-578	CNEP1R1
hsa-mir-578	IGSF10
hsa-mir-578	SLCO4C1
hsa-mir-578	PTCHD3
hsa-mir-578	LHFPL3
hsa-mir-578	FIBIN
hsa-mir-578	TMEM233
hsa-mir-578	NUGGC
hsa-mir-578	GOLGA8B
hsa-mir-578	LOH12CR2
hsa-mir-578	LINC00598
hsa-mir-578	KRTAP4-9
hsa-mir-578	ARL17B
hsa-mir-609	ACP1
hsa-mir-609	GRK3
hsa-mir-609	CHD3
hsa-mir-609	COX6B1
hsa-mir-609	CPM
hsa-mir-609	DHODH
hsa-mir-609	EEF2
hsa-mir-609	GLUD1
hsa-mir-609	KCND3
hsa-mir-609	MAX
hsa-mir-609	ALDH6A1
hsa-mir-609	MPP2
hsa-mir-609	NFIC
hsa-mir-609	RAB5B
hsa-mir-609	RAP2B
hsa-mir-609	RPL23A
hsa-mir-609	RPS24
hsa-mir-609	VASP
hsa-mir-609	ZNF131
hsa-mir-609	SMC1A
hsa-mir-609	ARID1A
hsa-mir-609	FXR2
hsa-mir-609	PARP2
hsa-mir-609	ZNF385A
hsa-mir-609	CHTOP
hsa-mir-609	C16orf72
hsa-mir-609	PLAC8
hsa-mir-609	ALKBH5
hsa-mir-609	DPPA4
hsa-mir-609	UBE2Q1
hsa-mir-609	DIABLO
hsa-mir-609	ZMIZ1
hsa-mir-609	GPBP1L1
hsa-mir-609	C16orf58
hsa-mir-609	MED28
hsa-mir-609	ZNF394
hsa-mir-609	ZBED3
hsa-mir-609	GLIS2
hsa-mir-609	PPP1R9B
hsa-mir-609	TIMM29
hsa-mir-609	ZNF682
hsa-mir-609	PRRT2
hsa-mir-609	PALM2
hsa-mir-609	WHAMM
hsa-mir-609	SYT2
hsa-mir-609	NACC2
hsa-mir-609	TMPRSS6
hsa-mir-609	FOXK1
hsa-mir-609	TMED4
hsa-mir-609	MYO1H
hsa-mir-609	DPY19L4
hsa-mir-609	LRRC10
hsa-mir-190b	ADCYAP1R1
hsa-mir-190b	BCL2
hsa-mir-190b	KLF6
hsa-mir-190b	DAB2
hsa-mir-190b	GPC5
hsa-mir-190b	FOXN2
hsa-mir-190b	IGF1
hsa-mir-190b	IL6ST
hsa-mir-190b	IL7R
hsa-mir-190b	LDHA
hsa-mir-190b	MAP3K9
hsa-mir-190b	OMD
hsa-mir-190b	OVOL1
hsa-mir-190b	PTEN
hsa-mir-190b	PTPRJ
hsa-mir-190b	TRA2B
hsa-mir-190b	ZNF223
hsa-mir-190b	CSDE1
hsa-mir-190b	CDKL2
hsa-mir-190b	MTMR6
hsa-mir-190b	ZNF264
hsa-mir-190b	SDC3
hsa-mir-190b	KIAA0232
hsa-mir-190b	TATDN2
hsa-mir-190b	SIGMAR1
hsa-mir-190b	STAMBP
hsa-mir-190b	MAP3K2
hsa-mir-190b	HBS1L
hsa-mir-190b	ZNF460
hsa-mir-190b	ADAMTS8
hsa-mir-190b	DUSP10
hsa-mir-190b	BCL2L13
hsa-mir-190b	INVS
hsa-mir-190b	SERP1
hsa-mir-190b	RAB30
hsa-mir-190b	TNRC6A
hsa-mir-190b	KCNMB4
hsa-mir-190b	MED4
hsa-mir-190b	FAM13B
hsa-mir-190b	KLHL24
hsa-mir-190b	PCDHB11
hsa-mir-190b	MKL2
hsa-mir-190b	ZNF608
hsa-mir-190b	MSANTD4
hsa-mir-190b	TRIM5
hsa-mir-190b	CALML4
hsa-mir-190b	PIGM
hsa-mir-190b	CYGB
hsa-mir-190b	LRRC58
hsa-mir-190b	PM20D2
hsa-mir-190b	TMEM161B
hsa-mir-190b	SPRED1
hsa-mir-190b	SGMS2
hsa-mir-190b	ZNF850
hsa-mir-190b	CCDC160
hsa-mir-190b	ENO4
hsa-mir-190b	NOTCH2NL
hsa-mir-190b	HACD4
hsa-mir-190b	PGAM4
hsa-mir-190b	ATXN7L3B
hsa-mir-190b	MTRNR2L8
hsa-mir-190b	MTRNR2L10
